# Supplementary material for: Visible-light-driven electron donor–acceptor complex induced sulfonylation of diazonium salts with sulfinates
Source: Royal Society of Chemistry journal article supplement (doi:10.1039/d1gc03239a), 2021-01-01
Supplement: d1gc03239a1.pdf [file d1gc03239a1.pdf]

# Supporting Information

## Visible-Light-Driven Electron Donor–Acceptor Complex Induced Sulfonylation of Diazonium Salts with Sulfinates

Xin Liang,<sup>†a</sup> Yufei Li,<sup>†a</sup> Qing Xia,<sup>\*a</sup> Lan Cheng,<sup>a</sup> Jianbo Guo,<sup>a</sup> Pei Zhang,<sup>a</sup> Weihua Zhang,<sup>\*a</sup> and Qingmin Wang<sup>\*b</sup>

<sup>a</sup>Jiangsu Key Laboratory of Pesticide Science, College of Sciences, Nanjing Agricultural University, Nanjing 210095, China.

<sup>b</sup>State Key Laboratory of Elemento-Organic Chemistry, Research Institute of Elemento-Organic Chemistry, College of Chemistry, Collaborative Innovation Center of Chemical Science and Engineering (Tianjin), Nankai University, Tianjin 300071, China.

### Table of Contents

|                                                                          |     |
|--------------------------------------------------------------------------|-----|
| 1. General Information.....                                              | S2  |
| 2. Synthesis of Diazonium Salts.....                                     | S2  |
| 3. Synthesis of Sodium Sulfinates.....                                   | S3  |
| 4. Optimization Experiments.....                                         | S3  |
| 5. General Protocol for the Synthesis of Sulfonylation Products.....     | S4  |
| 6. Gram-scale Experiments.....                                           | S4  |
| 7. Characterization of the Target Products.....                          | S4  |
| 8. Mechanistic Studies                                                   |     |
| 8.1 TEMPO radical trapping experiments.....                              | S14 |
| 8.2 UV/vis absorption spectrometry between <b>1a</b> and <b>2a</b> ..... | S15 |
| 8.3 Stoichiometry of the EDA complex <b>1a+2a</b> .....                  | S16 |
| 8.4 Substrate replaced reaction.....                                     | S17 |
| 9. <sup>1</sup> H NMR and <sup>13</sup> C NMR Spectra.....               | S18 |
| 10. References.....                                                      | S55 |

## 1. General Information

Chemicals and anhydrous solvents were purchased from commercial suppliers and used as received.  $^1\text{H}$  NMR,  $^{13}\text{C}$  NMR, and  $^{19}\text{F}$  NMR spectras were recorded by Bruker AV 400 or Bruker AV 500 spectrometers. Chemical shifts ( $\delta$ ) were given in parts per million (ppm) and were measured downfield from internal tetramethylsilane. All High-Resolution Mass Spectra (HRMS) were obtained from AB SCIEX Triple TOF 5600<sup>+</sup> spectrometer. UV-Vis absorption spectra were recorded by using Shimadzu UV-1800 UV/Vis spectrometer. Flash column chromatography was performed over silica gel (200-300 mesh). The light source was used 18 W LEDs (manufacturer: Xuzhou Facai Lighting Co. Ltd. of China, wavelength: 400 nm purple LEDs, 460 nm blue LEDs, 510 nm green LEDs and white LEDs), less than 1 cm from the light source to the irradiation vessel.

## 2. Synthesis of Diazonium Salts

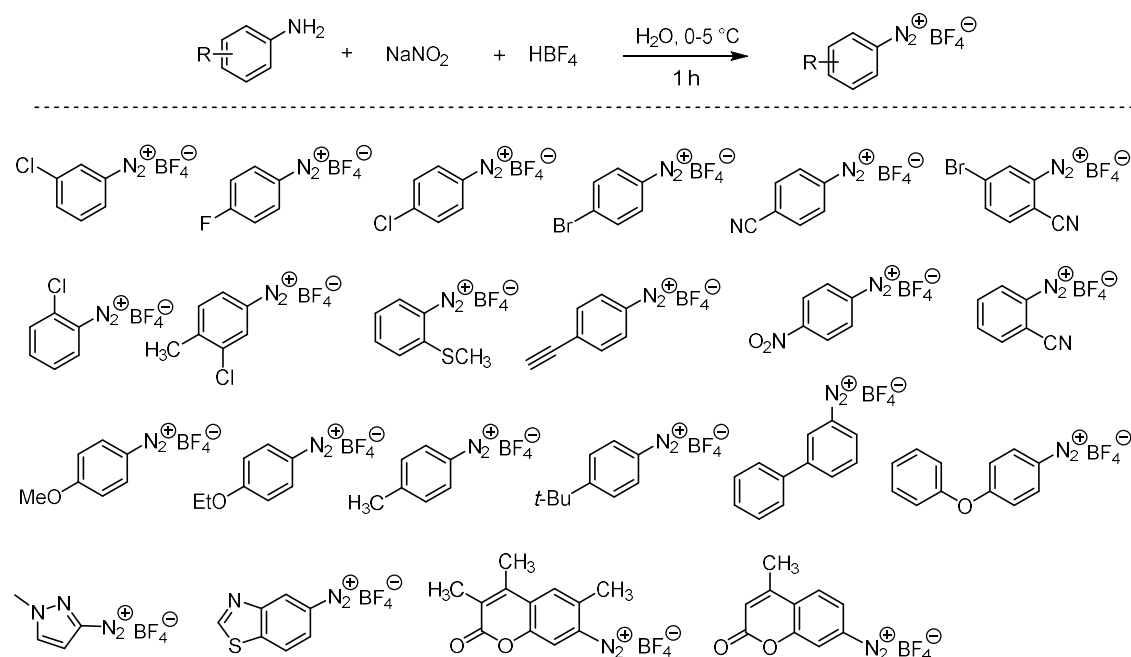

General procedure: The diazonium salts were synthesized according to a published procedure.<sup>1</sup> A pre-cooling sodium nitrite (20 mmol) in 15 mL water was added to a mixture solution of HBF<sub>4</sub> (50 wt% in water, 6 mL) and aniline (20 mmol) in water (6 mL) in an ice-water bath. After 1 h of vigorous stirring, the precipitate was collected by filtration, followed by washing with little ice-cold water. The white crystalline was obtained by re-dissolved in acetone and then precipitated with the addition of diethyl ether, then drying to give diazonium salt.

### 3. Synthesis of Sodium Sulfonates

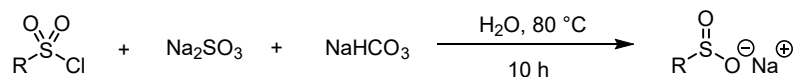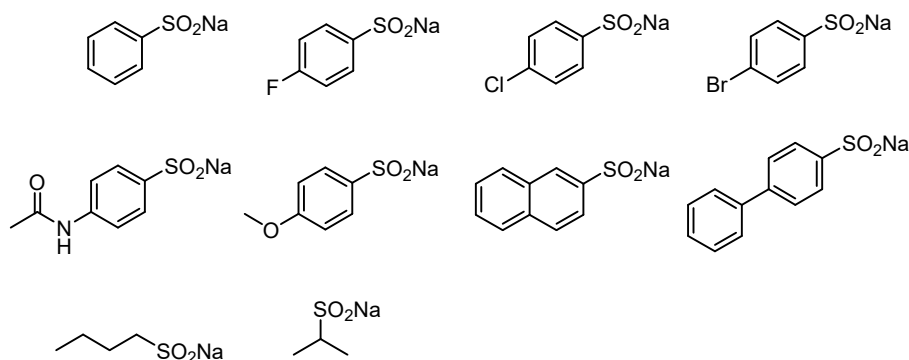

General procedure: The sodium sulfonates were synthesized according to a published procedure.<sup>2</sup> Sulfonic acid chloride (10 mmol) was added to a mixture of Na<sub>2</sub>SO<sub>3</sub> (20 mmol) and NaHCO<sub>3</sub> (20 mmol) in water (10 mL) and the result mixture was stirred at 80 °C for 10 h. After cooling down to room temperature, the water was removed in vacuum and the residue was extracted in ethanol. Recrystallization from ethanol furnished sodium sulfinate as a white or light yellow solid.

### 4. Optimization Experiments

Table S1. Optimization of reaction conditions.<sup>a</sup>

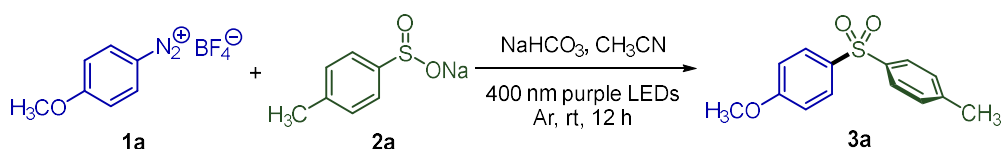

| entry | variations from standard conditions                             | <b>3a</b> <sup>b</sup> (%) |
|-------|-----------------------------------------------------------------|----------------------------|
| 1     | none                                                            | 88                         |
| 2     | Na <sub>2</sub> CO <sub>3</sub> , instead of NaHCO <sub>3</sub> | 84                         |
| 3     | Cs <sub>2</sub> CO <sub>3</sub> , instead of NaHCO <sub>3</sub> | 74                         |
| 4     | K <sub>3</sub> PO <sub>4</sub> , instead of NaHCO <sub>3</sub>  | 78                         |
| 5     | DCM, instead of CH <sub>3</sub> CN                              | 40                         |
| 6     | DMA, instead of CH <sub>3</sub> CN                              | 32                         |
| 7     | DMSO, instead of CH <sub>3</sub> CN                             | 30                         |
| 8     | 1.0 equiv of NaHCO <sub>3</sub>                                 | 88                         |
| 9     | without NaHCO <sub>3</sub>                                      | 76                         |
| 10    | 1.0 equiv of <b>1a</b>                                          | 75                         |
| 11    | white LEDs                                                      | 13                         |
| 12    | 460 nm blue LEDs                                                | 10                         |
| 13    | 510 nm green LEDs                                               | 0                          |

|                                                                                                                                                                                                                                                                                   |                           |       |
|-----------------------------------------------------------------------------------------------------------------------------------------------------------------------------------------------------------------------------------------------------------------------------------|---------------------------|-------|
| 14                                                                                                                                                                                                                                                                                | in the dark               | trace |
| 15                                                                                                                                                                                                                                                                                | air atmosphere            | 38    |
| 16                                                                                                                                                                                                                                                                                | O <sub>2</sub> atmosphere | trace |
| <sup>a</sup> Reaction conditions: <b>1a</b> (0.3 mmol, 1.5 equiv), <b>2a</b> (0.2 mmol), NaHCO <sub>3</sub> (0.04 mmol, 0.2 equiv), CH <sub>3</sub> CN [0.2 M], room temperature, argon atmosphere, 400 nm purple LEDs, 12 h.<br><sup>b</sup> Isolated yield based on <b>2a</b> . |                           |       |

## 5. General Protocol for the Synthesis of Sulfonylation Products

To a solution of **1** (0.3 mmol, 1.5 equiv) in MeCN (1.0 mL, 0.2 M) was added **2** (0.2 mmol) and NaHCO<sub>3</sub> (3.4 mg, 0.04 mmol) in an oven-dried 8 mL reaction vial. The mixture was bubbled with Ar for 2 min, and the reaction was executed under argon atmosphere. The reaction was then stirred and photolyzed with 15 W 400 nm purple LEDs at distances to the vial of approximately 1 cm for 12 h. Afterwards, the mixture was purified by flash chromatography on silica gel to afford **3** or **4** as solids or liquid.

## 6. Gram-scale Experiments

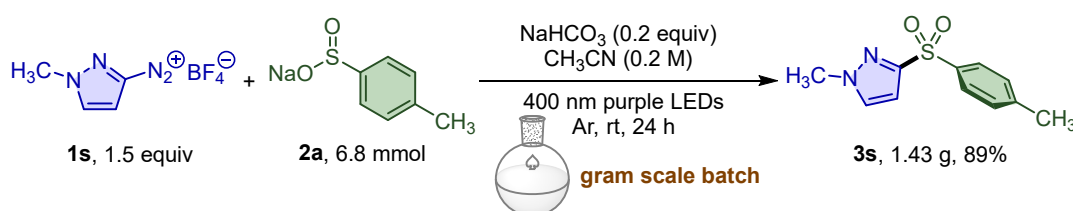

A gram-scale experiment for synthesis of **3s** was carried out. To a solution of **1s** (2.00 g, 10.2 mmol) in MeCN (34.0 mL, 0.2 M) was added **2a** (1.21 g, 6.8 mmol) and NaHCO<sub>3</sub> (114 mg, 1.4 mmol) in an oven-dried 50 mL round bottom flask. The mixture was bubbled with Ar for 2 min, and the reaction was executed under argon atmosphere. The reaction was then stirred and photolyzed with 15 W 400 nm purple LEDs at distances to the round bottom flask of approximately 1 cm for 24 h. Afterwards, the mixture was purified by flash chromatography on silica gel (petroleum ether/EtOAc = 3:1) to afford **3s** as dark yellow solid, 1.43 g, 89% yield.

## 7. Characterization of the Target Products

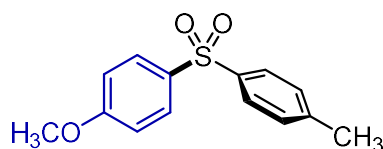

1-Methoxy-4-tosylbenzene (**3a**). Purification by chromatography (petroleum

ether/EtOAc = 4:1) afforded **3a** as yellow solid, m.p. 157-159 °C, 36 mg, 88% yield. <sup>1</sup>H NMR (400 MHz, CDCl<sub>3</sub>) δ 7.86 (d, *J* = 8.3 Hz, 2H), 7.82 (d, *J* = 9.1 Hz, 2H), 7.40 – 7.34 (m, 2H), 6.95 (d, *J* = 9.2 Hz, 2H), 3.88 (s, 3H), 2.46 (s, 3H). <sup>13</sup>C NMR (100 MHz, CDCl<sub>3</sub>) δ 165.49, 145.74, 143.49, 130.84, 130.27, 129.92, 127.43, 114.80, 56.00, 21.92. HRMS (ESI) *m/z*: [M + H]<sup>+</sup> calcd for C<sub>14</sub>H<sub>15</sub>O<sub>3</sub>S 263.0736, found 263.0734.

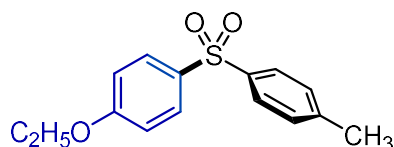

1-Ethoxy-4-tosylbenzene (**3b**). Purification by chromatography (petroleum ether/EtOAc = 4:1) afforded **3b** as yellow oil, 24 mg, 43% yield. <sup>1</sup>H NMR (400 MHz, CDCl<sub>3</sub>) δ 7.85 (d, *J* = 8.3 Hz, 2H), 7.81 (d, *J* = 9.0 Hz, 2H), 7.37 (d, *J* = 8.1 Hz, 2H), 6.93 (d, *J* = 9.1 Hz, 2H), 4.11 (q, *J* = 7.0 Hz, 2H), 2.46 (s, 3H), 1.44 (t, *J* = 7.0 Hz, 3H). <sup>13</sup>C NMR (100 MHz, CDCl<sub>3</sub>) δ 165.00, 145.69, 143.36, 130.94, 130.28, 129.92, 127.49, 115.20, 64.43, 21.91, 14.70. HRMS (ESI) *m/z*: [M + H]<sup>+</sup> calcd for C<sub>15</sub>H<sub>17</sub>O<sub>3</sub>S 277.0893, found 277.0894.

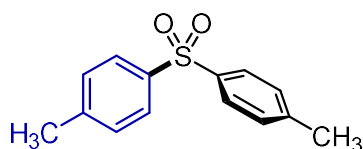

4,4'-Sulfonylbis(methylbenzene) (**3c**). Purification by chromatography (petroleum ether/EtOAc = 6:1) afforded **3c** as yellow solid, m.p. 158-159 °C, 35 mg, 71% yield. <sup>1</sup>H NMR (500 MHz, CDCl<sub>3</sub>) δ 7.85 (d, *J* = 8.3 Hz, 2H), 7.71 (d, *J* = 8.5 Hz, 2H), 7.38 (d, *J* = 7.8 Hz, 2H), 7.27 (d, *J* = 7.8 Hz, 2H), 2.46 (s, 3H), 2.41 (s, 3H). <sup>13</sup>C NMR (125 MHz, CDCl<sub>3</sub>) δ 147.39, 146.57, 145.96, 130.41, 130.36, 130.27, 129.96, 124.77, 21.96, 21.90. HRMS (ESI) *m/z*: [M + H]<sup>+</sup> calcd for C<sub>14</sub>H<sub>15</sub>O<sub>2</sub>S 247.0787, found 247.0791.

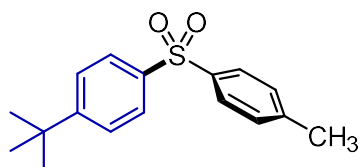

1-(*tert*-Butyl)-4-tosylbenzene (**3d**). Purification by chromatography (petroleum ether/EtOAc = 4:1) afforded **3d** as light yellow solid, m.p. 70-72 °C, 47 mg, 81% yield. <sup>1</sup>H NMR (400 MHz, CDCl<sub>3</sub>) δ 7.85 (d, *J* = 8.3 Hz, 2H), 7.76 (d, *J* = 8.7 Hz, 2H), 7.50 (d, *J* = 8.7 Hz, 2H), 7.37 (d, *J* = 8.0 Hz, 2H), 2.46 (s, 3H), 1.32 (s, 9H). <sup>13</sup>C NMR (100 MHz, CDCl<sub>3</sub>) δ 159.40, 147.16, 145.93, 130.35, 130.32, 129.94, 126.56, 124.55, 35.51, 31.08, 21.87. HRMS (ESI) *m/z*: [M + H]<sup>+</sup> calcd for C<sub>17</sub>H<sub>21</sub>O<sub>2</sub>S 289.1257, found

289.1249.

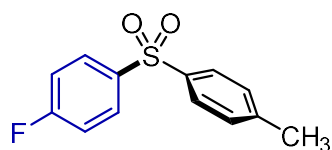

1-Fluoro-4-tosylbenzene (**3e**). Purification by chromatography (petroleum ether/EtOAc = 4:1) afforded **2** as dark yellow solid, m.p. 112-114 °C, 43 mg, 86% yield.  $^1\text{H}$  NMR (400 MHz,  $\text{CDCl}_3$ )  $\delta$  7.86 (m, 4H) 7.39 (d,  $J = 7.9$  Hz, 2H), 7.22 – 7.06 (m, 2H), 2.47 (s, 3H).  $^{13}\text{C}$  NMR (125 MHz,  $\text{DMSO-}d_6$ )  $\delta$  166.23 (d,  $J = 256.3$  Hz), 146.54, 145.26 (d,  $J = 2.6$  Hz), 130.40, 130.05, 129.08, 127.26 (d,  $J = 10.3$  Hz), 117.48 (d,  $J = 23.6$  Hz), 21.30.  $^{19}\text{F}$  NMR (471 MHz,  $\text{DMSO-}d_6$ )  $\delta$  -101.85. HRMS (ESI)  $m/z$ :  $[\text{M} + \text{H}]^+$  calcd for  $\text{C}_{13}\text{H}_{12}\text{FO}_2\text{S}$  251.0537, found 251.0535.

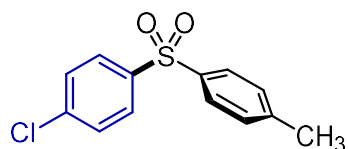

1-Chloro-4-tosylbenzene (**3f**). Purification by chromatography (petroleum ether/EtOAc = 4:1) afforded **3f** as yellow solid, m.p. 126-128 °C, 36 mg, 67% yield.  $^1\text{H}$  NMR (400 MHz,  $\text{CDCl}_3$ )  $\delta$  7.85 (d,  $J = 8.3$  Hz, 2H), 7.77 (d,  $J = 8.8$  Hz, 2H), 7.47 (d,  $J = 8.8$  Hz, 2H), 7.40 (d,  $J = 8.1$  Hz, 2H), 2.48 (s, 3H).  $^{13}\text{C}$  NMR (100 MHz,  $\text{CDCl}_3$ )  $\delta$  147.59, 146.31, 141.39, 130.53, 130.08, 130.01, 129.88, 125.86, 21.96. HRMS (ESI)  $m/z$ :  $[\text{M} + \text{H}]^+$  calcd for  $\text{C}_{13}\text{H}_{12}\text{ClO}_2\text{S}$  267.0241, found 267.0239.

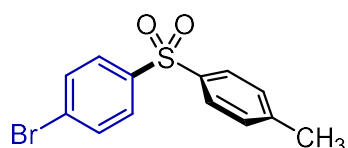

1-Bromo-4-tosylbenzene (**3g**). Purification by chromatography (petroleum ether/EtOAc = 4:1) afforded **3g** as yellow solid, m.p. 133-135 °C, 50 mg, 80% yield.  $^1\text{H}$  NMR (400 MHz,  $\text{CDCl}_3$ )  $\delta$  7.85 (d,  $J = 8.4$  Hz, 2H), 7.68 (d,  $J = 8.9$  Hz, 2H), 7.63 (d,  $J = 8.8$  Hz, 2H), 7.40 (d,  $J = 8.1$  Hz, 2H), 2.48 (s, 3H).  $^{13}\text{C}$  NMR (100 MHz,  $\text{CDCl}_3$ )  $\delta$  147.95, 146.34, 133.03, 130.53, 130.15, 130.09, 129.83, 125.91, 21.95. HRMS (ESI)  $m/z$ :  $[\text{M} + \text{H}]^+$  calcd for  $\text{C}_{13}\text{H}_{12}\text{BrO}_2\text{S}$  310.9736, found 310.9726.

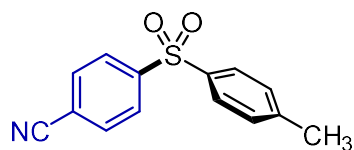

4-Tosylbenzonitrile (**3h**). Purification by chromatography (petroleum ether/EtOAc = 4:1) afforded **3h** as light yellow solid, m.p. 136-137 °C, 37 mg, 72% yield.  $^1\text{H}$  NMR

(400 MHz, CDCl<sub>3</sub>)  $\delta$  7.90 (d,  $J$  = 8.6 Hz, 2H), 7.86 (d,  $J$  = 8.4 Hz, 2H), 7.80 (d,  $J$  = 8.6 Hz, 2H), 7.42 (d,  $J$  = 8.1 Hz, 2H), 2.49 (s, 3H). <sup>13</sup>C NMR (100 MHz, CDCl<sub>3</sub>)  $\delta$  150.98, 146.79, 133.60, 130.67, 130.22, 129.13, 124.82, 117.60, 117.59, 21.99. HRMS (ESI)  $m/z$ : [M + H]<sup>+</sup> calcd for C<sub>14</sub>H<sub>12</sub>NO<sub>2</sub>S 258.0583, found 258.0586.

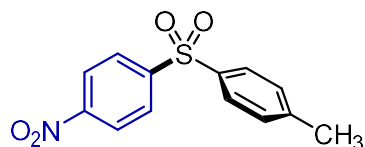

1-methyl-4-((4-nitrophenyl)sulfonyl)benzene (**3i**). Purification by chromatography (petroleum ether/EtOAc = 4:1) afforded **3i** as yellow solid, m.p. 165-167 °C, 33 mg, 60% yield. <sup>1</sup>H NMR (400 MHz, CDCl<sub>3</sub>)  $\delta$  8.35 (d,  $J$  = 8.9 Hz, 2H), 7.96 (d,  $J$  = 9.0 Hz, 2H), 7.86 (d,  $J$  = 8.3 Hz, 2H), 7.43 (d,  $J$  = 8.0 Hz, 2H), 2.49 (s, 3H). <sup>13</sup>C NMR (125 MHz, CDCl<sub>3</sub>)  $\delta$  152.18, 150.87, 146.90, 130.75, 130.29, 129.11, 125.19, 125.07, 22.01. HRMS (ESI)  $m/z$ : [M + H]<sup>+</sup> calcd for C<sub>13</sub>H<sub>12</sub>NO<sub>4</sub>S 278.0482, found 278.0472.

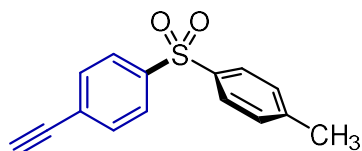

1-Ethynyl-4-tosylbenzene (**3j**). Purification by chromatography (petroleum ether/EtOAc = 4:1) afforded **3j** as red oil, 10 mg, 20% yield. <sup>1</sup>H NMR (400 MHz, CDCl<sub>3</sub>)  $\delta$  7.86 (d,  $J$  = 8.2 Hz, 2H), 7.78 (d,  $J$  = 8.6 Hz, 2H), 7.59 (d,  $J$  = 8.6 Hz, 2H), 7.40 (d,  $J$  = 8.0 Hz, 2H), 3.32 (s, 1H), 2.48 (s, 3H). <sup>13</sup>C NMR (125 MHz, CDCl<sub>3</sub>)  $\delta$  148.69, 146.32, 133.34, 130.57, 130.09, 129.87, 128.86, 124.55, 82.57, 81.98, 21.96. HRMS (ESI)  $m/z$ : [M + H]<sup>+</sup> calcd for C<sub>15</sub>H<sub>13</sub>O<sub>2</sub>S 257.0631, found 257.0631.

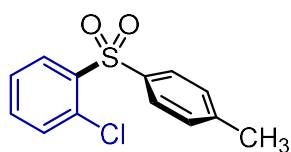

1-Chloro-2-tosylbenzene (**3k**). Purification by chromatography (petroleum ether/EtOAc = 4:1) afforded **3k** as yellow oil, 42 mg, 79% yield. <sup>1</sup>H NMR (400 MHz, CDCl<sub>3</sub>)  $\delta$  7.83 (d,  $J$  = 8.3 Hz, 2H), 7.65 (d,  $J$  = 7.5 Hz, 1H), 7.53 – 7.48 (m, 2H), 7.39 (d,  $J$  = 8.1 Hz, 2H), 7.32 (ddd,  $J$  = 8.4, 5.6, 3.1 Hz, 1H), 2.47 (s, 3H). <sup>13</sup>C NMR (125 MHz, CDCl<sub>3</sub>)  $\delta$  146.27, 145.32, 138.25, 135.59, 131.42, 130.90, 129.92, 129.34, 127.64, 118.07, 21.96. HRMS (ESI)  $m/z$ : [M + H]<sup>+</sup> calcd for C<sub>13</sub>H<sub>12</sub>ClO<sub>2</sub>S 267.0241, found 267.0234.

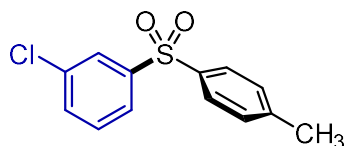

1-chloro-3-tosylbenzene (**3l**). Purification by chromatography (petroleum ether/EtOAc = 4:1) afforded **3l** as yellow oil, 47 mg, 88% yield.  $^1\text{H}$  NMR (500 MHz,  $\text{CDCl}_3$ )  $\delta$  7.82 (d,  $J = 8.3$  Hz, 2H), 7.71 (t,  $J = 2.0$  Hz, 1H), 7.68 (ddd,  $J = 7.9, 1.9, 1.1$  Hz, 1H), 7.51 (ddd,  $J = 8.0, 2.1, 1.1$  Hz, 1H), 7.42 (t,  $J = 8.0$  Hz, 1H), 7.38 (d,  $J = 7.6$  Hz, 2H), 2.45 (s, 3H).  $^{13}\text{C}$  NMR (125 MHz,  $\text{CDCl}_3$ )  $\delta$  149.77, 146.43, 135.59, 134.40, 130.65, 130.42, 130.05, 129.42, 123.51, 123.40, 21.83. HRMS (ESI)  $m/z$ :  $[\text{M} + \text{H}]^+$  calcd for  $\text{C}_{13}\text{H}_{12}\text{ClO}_2\text{S}$  267.0241, found 267.0245.

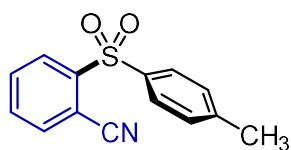

2-Tosylbenzonitrile (**3m**). Purification by chromatography (petroleum ether/EtOAc = 4:1) afforded **3m** as light yellow solid, m.p. 105-107 °C, 33 mg, 64% yield.  $^1\text{H}$  NMR (500 MHz,  $\text{CDCl}_3$ )  $\delta$  7.84 – 7.78 (m, 4H), 7.75 – 7.68 (m, 2H), 7.41 (d,  $J = 8.0$  Hz, 2H), 2.47 (s, 3H).  $^{13}\text{C}$  NMR (125 MHz,  $\text{CDCl}_3$ )  $\delta$  149.34, 146.90, 134.70, 134.19, 133.76, 130.97, 130.15, 128.11, 117.35, 115.64, 114.88, 21.94. HRMS (ESI)  $m/z$ :  $[\text{M} + \text{H}]^+$  calcd for  $\text{C}_{14}\text{H}_{12}\text{NO}_2\text{S}$  258.0583, found 258.0579.

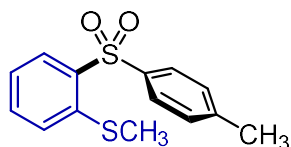

Methyl(2-tosylphenyl)sulfane (**3n**). Purification by chromatography (petroleum ether/EtOAc = 4:1) afforded **3n** as red oil, 38 mg, 68% yield.  $^1\text{H}$  NMR (400 MHz,  $\text{CDCl}_3$ )  $\delta$  7.84 (d,  $J = 8.1$  Hz, 2H), 7.66 (d,  $J = 8.1$  Hz, 1H), 7.47 (t,  $J = 7.7$  Hz, 1H), 7.38 (d,  $J = 8.0$  Hz, 2H), 7.24 (d,  $J = 8.2$  Hz, 1H), 7.14 (t,  $J = 7.7$  Hz, 1H), 2.47 (s, 3H), 2.37 (s, 3H).  $^{13}\text{C}$  NMR (125 MHz,  $\text{DMSO}-d_6$ )  $\delta$  146.26, 144.36, 144.22, 136.02, 130.26, 130.08, 127.83, 125.86, 125.01, 119.57, 21.27, 13.93. HRMS (ESI)  $m/z$ :  $[\text{M} + \text{H}]^+$  calcd for  $\text{C}_{14}\text{H}_{15}\text{O}_2\text{S}_2$  279.0508, found 279.0508.

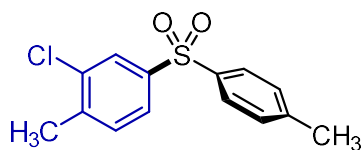

2-chloro-1-methyl-4-tosylbenzene (**3o**). Purification by chromatography (petroleum ether/EtOAc = 4:1) afforded **3o** as red oil, 48 mg, 86% yield.  $^1\text{H}$  NMR (400 MHz,



CDCl<sub>3</sub>)  $\delta$  7.85 (d,  $J$  = 8.2 Hz, 2H), 7.79 (d,  $J$  = 2.0 Hz, 1H), 7.65 (dd,  $J$  = 8.1, 2.0 Hz, 1H), 7.39 (d,  $J$  = 8.0 Hz, 2H), 7.36 (d,  $J$  = 8.1 Hz, 1H), 2.48 (s, 3H), 2.44 (s, 3H). <sup>13</sup>C NMR (100 MHz, CDCl<sub>3</sub>)  $\delta$  148.12, 146.27, 143.91, 135.73, 131.77, 130.49, 130.06, 129.89, 124.53, 123.34, 21.94, 20.69. HRMS (ESI)  $m/z$ : [M + H]<sup>+</sup> calcd for C<sub>14</sub>H<sub>14</sub>ClO<sub>2</sub>S 281.0398, found 281.0396.

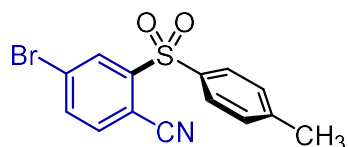

4-Bromo-2-tosylbenzonitrile (**3p**). Purification by chromatography (petroleum ether/EtOAc = 4:1) afforded **3p** as light yellow solid, m.p. 129-130 °C, 22 mg, 33% yield. <sup>1</sup>H NMR (500 MHz, CDCl<sub>3</sub>)  $\delta$  7.95 (d,  $J$  = 1.9 Hz, 1H), 7.85 – 7.79 (m, 3H), 7.68 (d,  $J$  = 8.2 Hz, 1H), 7.42 (d,  $J$  = 8.1 Hz, 2H), 2.48 (s, 3H). <sup>13</sup>C NMR (125 MHz, CDCl<sub>3</sub>)  $\delta$  149.76, 147.17, 137.40, 134.93, 131.02, 130.25, 128.80, 127.83, 120.78, 114.29, 114.26, 21.99. HRMS (ESI)  $m/z$ : [M + H]<sup>+</sup> calcd for C<sub>14</sub>H<sub>11</sub>BrNO<sub>2</sub>S 335.9688, found 335.9685.

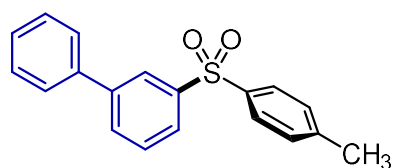

3-Tosyl-1,1'-biphenyl (**3q**). Purification by chromatography (petroleum ether/EtOAc = 12:1) afforded **3q** as yellow solid, m.p. 197-199 °C, 33 mg, 54% yield. <sup>1</sup>H NMR (500 MHz, CDCl<sub>3</sub>)  $\delta$  8.03 (t,  $J$  = 1.9 Hz, 1H), 7.89 (d,  $J$  = 8.4 Hz, 2H), 7.80 (dddd,  $J$  = 8.9, 8.1, 2.0, 1.1 Hz, 2H), 7.60 – 7.54 (m, 3H), 7.45 (t,  $J$  = 7.4 Hz, 2H), 7.42 – 7.37 (m, 3H), 2.48 (s, 3H). <sup>13</sup>C NMR (125 MHz, CDCl<sub>3</sub>)  $\delta$  149.73, 146.20, 142.90, 139.27, 133.38, 130.51, 130.06, 130.03, 130.00, 129.11, 128.31, 127.19, 123.25, 123.13, 21.92. HRMS (ESI)  $m/z$ : [M + H]<sup>+</sup> calcd for C<sub>19</sub>H<sub>17</sub>O<sub>2</sub>S 309.0944, found 309.0941.

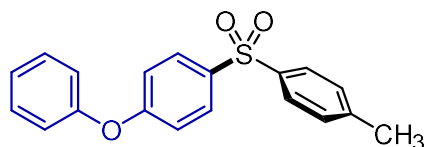

1-Methyl-4-((4-phenoxyphenyl)sulfonyl)benzene (**3r**). Purification by chromatography (petroleum ether/EtOAc = 4:1) afforded **3r** as yellow oil, 47 mg, 72% yield. <sup>1</sup>H NMR (500 MHz, CDCl<sub>3</sub>)  $\delta$  7.86 (d,  $J$  = 8.4 Hz, 2H), 7.81 (d,  $J$  = 9.0 Hz, 2H), 7.41 (dd,  $J$  = 8.6, 7.5 Hz, 2H), 7.38 (d,  $J$  = 7.9 Hz, 2H), 7.23 (t,  $J$  = 7.5 Hz, 1H), 7.07 (dd,  $J$  = 8.7, 1.1 Hz, 2H), 7.00 (d,  $J$  = 9.2 Hz, 2H), 2.46 (s, 3H). <sup>13</sup>C NMR (125 MHz,

CDCl<sub>3</sub>)  $\delta$  164.00, 154.90, 145.91, 144.44, 130.60, 130.35, 130.33, 129.97, 127.22, 125.37, 120.61, 117.84, 21.91. HRMS (ESI)  $m/z$ : [M + H]<sup>+</sup> calcd for C<sub>19</sub>H<sub>17</sub>O<sub>3</sub>S 325.0893, found 325.0895.

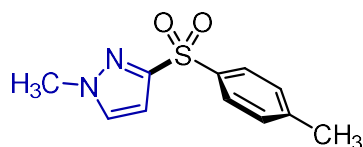

1-Methyl-3-tosyl-1*H*-pyrazole (**3s**). Purification by chromatography (petroleum ether/EtOAc = 2:1) afforded **3s** as dark yellow solid, m.p. 64-65 °C, 43 mg, 90% yield. <sup>1</sup>H NMR (500 MHz, CDCl<sub>3</sub>)  $\delta$  7.81 (d,  $J$  = 8.3 Hz, 2H), 7.41 (d,  $J$  = 2.6 Hz, 1H), 7.36 (d,  $J$  = 7.9 Hz, 2H), 6.65 (d,  $J$  = 2.6 Hz, 1H), 3.98 (s, 3H), 2.44 (s, 3H). <sup>13</sup>C NMR (125 MHz, CDCl<sub>3</sub>)  $\delta$  159.82, 146.09, 132.99, 130.62, 130.05, 129.58, 98.31, 40.32, 21.91. HRMS (ESI)  $m/z$ : [M + H]<sup>+</sup> calcd for C<sub>11</sub>H<sub>13</sub>N<sub>2</sub>O<sub>2</sub>S 237.0692, found 237.0690.

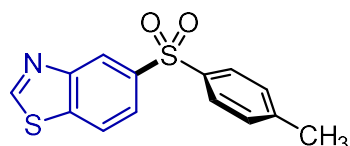

5-Tosylbenzo[d]thiazole (**3t**). Purification by chromatography (petroleum ether/EtOAc = 3:1) afforded **3t** as dark brown oil, 26 mg, 45% yield. <sup>1</sup>H NMR (500 MHz, CDCl<sub>3</sub>)  $\delta$  9.06 (s, 1H), 8.46 (d,  $J$  = 1.8 Hz, 1H), 7.96 (d,  $J$  = 8.7 Hz, 1H), 7.84 (d,  $J$  = 8.3 Hz, 2H), 7.81 (dd,  $J$  = 8.7, 1.9 Hz, 1H), 7.36 (d,  $J$  = 7.7 Hz, 2H), 2.42 (s, 3H). <sup>13</sup>C NMR (125 MHz, CDCl<sub>3</sub>)  $\delta$  156.68, 153.59, 147.67, 146.19, 140.34, 130.32, 129.95, 129.75, 122.73, 118.38, 21.78. HRMS (ESI)  $m/z$ : [M + H]<sup>+</sup> calcd for C<sub>14</sub>H<sub>12</sub>NO<sub>2</sub>S<sub>2</sub> 290.0304, found 290.0302.

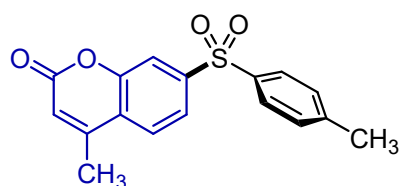

4-Methyl-7-tosyl-2*H*-chromen-2-one (**3u**). Purification by chromatography (petroleum ether/EtOAc = 2:1) afforded **3u** as yellow solid, m.p. 134-136 °C, 46 mg, 73% yield. <sup>1</sup>H NMR (500 MHz, CD<sub>2</sub>Cl<sub>2</sub>)  $\delta$  7.84 (d,  $J$  = 6.7 Hz, 2H), 7.78 – 7.72 (m, 2H), 7.69 (s, 1H), 7.45 (d,  $J$  = 8.5 Hz, 2H), 6.39 (s, 1H), 2.49 (s, 3H), 2.45 (s, 3H). <sup>13</sup>C NMR (125 MHz, CD<sub>2</sub>Cl<sub>2</sub>)  $\delta$  159.84, 154.20, 151.82, 150.70, 147.15, 130.80, 130.42, 129.62, 126.37, 125.15, 119.45, 118.02, 113.30, 21.97, 18.91. HRMS (ESI)  $m/z$ : [M + H]<sup>+</sup> calcd for C<sub>17</sub>H<sub>15</sub>O<sub>4</sub>S 315.0686, found 315.0680.

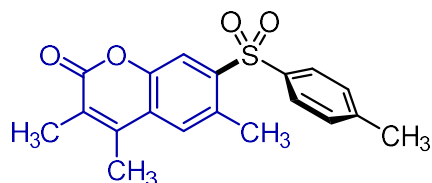

3,4,6-trimethyl-7-tosyl-2H-chromen-2-one (**3v**). Purification by chromatography (petroleum ether/EtOAc = 4:1) afforded **3v** as yellow solid, m.p. 140-142 °C, 32 mg, 47% yield. <sup>1</sup>H NMR (500 MHz, CD<sub>2</sub>Cl<sub>2</sub>) δ 7.92 (s, 1H), 7.79 (d, *J* = 8.3 Hz, 2H), 7.43 (d, *J* = 8.0 Hz, 2H), 7.19 (s, 1H), 2.48 (s, 3H), 2.38 (s, 3H), 2.29 (s, 3H), 2.17 (s, 3H). <sup>13</sup>C NMR (125 MHz, CD<sub>2</sub>Cl<sub>2</sub>) δ 161.01, 156.51, 146.71, 146.22, 145.07, 143.40, 130.84, 130.21, 130.02, 123.41, 119.82, 119.37, 112.72, 21.93, 17.26, 15.38, 13.65. HRMS (ESI) *m/z*: [M + H]<sup>+</sup> calcd for C<sub>19</sub>H<sub>19</sub>O<sub>4</sub>S 343.0999, found 343.0987.

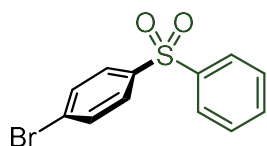

1-bromo-4-(phenylsulfonyl)benzene (**4a**). Purification by chromatography (petroleum ether/EtOAc = 12:1) afforded **4a** as yellow solid, m.p. 106-108 °C, 35 mg, 59% yield. <sup>1</sup>H NMR (400 MHz, CDCl<sub>3</sub>) δ 7.97 (dd, *J* = 8.4, 1.4 Hz, 2H), 7.73 (t, *J* = 7.5 Hz, 1H), 7.70 – 7.57 (m, 6H). <sup>13</sup>C NMR (125 MHz, CDCl<sub>3</sub>) δ 147.87, 134.98, 133.06, 130.50, 130.33, 129.37, 125.94. HRMS (ESI) *m/z*: [M + H]<sup>+</sup> calcd for C<sub>12</sub>H<sub>10</sub>BrO<sub>2</sub>S 296.9579, found 296.9580.

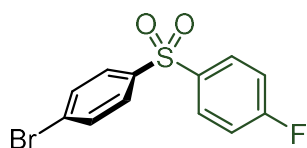

1-Bromo-4-((4-fluorophenyl)sulfonyl)benzene (**4b**). Purification by chromatography (petroleum ether/EtOAc = 15:1) afforded **4b** as yellow oil, 28 mg, 45% yield. <sup>1</sup>H NMR (500 MHz, DMSO-*d*<sub>6</sub>) δ 8.05 (dd, *J* = 5.5, 3.6 Hz, 2H), 7.83 (d, *J* = 7.3 Hz, 2H), 7.74 (d, *J* = 6.8 Hz, 2H), 7.58 (t, *J* = 8.6 Hz, 2H). <sup>13</sup>C NMR (125 MHz, DMSO-*d*<sub>6</sub>) δ 166.23 (d, *J* = 255.4 Hz), 147.22, 133.59 (d, *J* = 10.3 Hz), 133.38, 130.02, 128.03, 126.05, 117.34 (d, *J* = 23.2 Hz). <sup>19</sup>F NMR (471 MHz, DMSO-*d*<sub>6</sub>) δ -101.50. HRMS (ESI) *m/z*: [M + H]<sup>+</sup> calcd for C<sub>12</sub>H<sub>9</sub>BrFO<sub>2</sub>S 314.9485, found 314.9440.

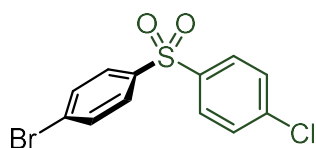

1-bromo-4-((4-chlorophenyl)sulfonyl)benzene (**4c**). Purification by chromatography

(petroleum ether/EtOAc = 15:1) afforded **4c** as yellow oil, 31 mg, 47% yield.  $^1\text{H}$  NMR (400 MHz, DMSO- $d_6$ )  $\delta$  7.97 (d,  $J$  = 8.7 Hz, 2H), 7.86 – 7.79 (m, 4H), 7.75 (d,  $J$  = 8.8 Hz, 2H).  $^{13}\text{C}$  NMR (100 MHz, DMSO- $d_6$ )  $\delta$  147.22, 140.90, 133.38, 132.05, 130.66, 130.10, 130.07, 126.07. HRMS (ESI)  $m/z$ :  $[\text{M} + \text{H}]^+$  calcd for  $\text{C}_{12}\text{H}_9\text{BrClO}_2\text{S}$  330.9190, found 330.9184.

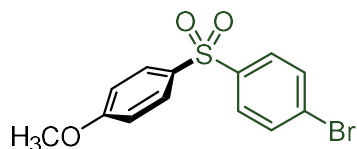

1-bromo-4-((4-methoxyphenyl)sulfonyl)benzene (**4d**). Purification by chromatography (petroleum ether/EtOAc = 4:1) afforded **4d** as yellow oil, 23 mg, 35% yield.  $^1\text{H}$  NMR (400 MHz,  $\text{CDCl}_3$ )  $\delta$  7.86 (d,  $J$  = 9.0 Hz, 2H), 7.65 (d,  $J$  = 8.9 Hz, 2H), 7.60 (d,  $J$  = 8.8 Hz, 2H), 7.03 (d,  $J$  = 9.0 Hz, 2H), 3.87 (s, 3H).  $^{13}\text{C}$  NMR (100 MHz,  $\text{CDCl}_3$ )  $\delta$  164.89, 147.81, 132.92, 132.67, 129.91, 125.77, 123.61, 114.72, 55.87. HRMS (ESI)  $m/z$ :  $[\text{M} + \text{H}]^+$  calcd for  $\text{C}_{13}\text{H}_{12}\text{BrO}_3\text{S}$  326.9685, found 326.9674.

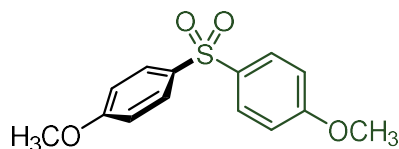

4,4'-Sulfonylbis(methoxybenzene) (**4e**). Purification by chromatography (petroleum ether/EtOAc = 4:1) afforded **4e** as yellow solid, m.p. 129-130 °C, 42 mg, 75% yield.  $^1\text{H}$  NMR (400 MHz,  $\text{CDCl}_3$ )  $\delta$  7.90 (d,  $J$  = 8.9 Hz, 2H), 7.82 (d,  $J$  = 9.0 Hz, 2H), 7.04 (d,  $J$  = 9.0 Hz, 2H), 6.95 (d,  $J$  = 9.1 Hz, 2H), 3.89 (d,  $J$  = 3.5 Hz, 6H).  $^{13}\text{C}$  NMR (100 MHz,  $\text{CDCl}_3$ )  $\delta$  165.39, 164.58, 143.41, 132.45, 127.32, 124.87, 114.78, 114.57, 55.97, 55.84. HRMS (ESI)  $m/z$ :  $[\text{M} + \text{H}]^+$  calcd for  $\text{C}_{14}\text{H}_{15}\text{O}_4\text{S}$  279.0686, found 279.0676.

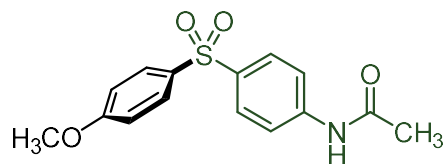

N-(4-((4-Methoxyphenyl)sulfonyl)phenyl)acetamide (**4f**). Purification by chromatography (petroleum ether/EtOAc = 1:1) afforded **4f** as yellow oil, 43 mg, 70% yield.  $^1\text{H}$  NMR (400 MHz,  $\text{CDCl}_3$ )  $\delta$  8.42 (s, 1H), 7.84 (d,  $J$  = 8.8 Hz, 2H), 7.80 – 7.74 (m, 4H), 6.93 (d,  $J$  = 9.1 Hz, 2H), 3.87 (s, 3H), 2.21 (s, 3H).  $^{13}\text{C}$  NMR (125 MHz,  $\text{CDCl}_3$ )  $\delta$  169.50, 165.75, 144.17, 143.35, 131.52, 127.50, 119.41, 114.94, 56.03, 24.84. HRMS (ESI)  $m/z$ :  $[\text{M} + \text{H}]^+$  calcd for  $\text{C}_{15}\text{H}_{16}\text{NO}_4\text{S}$  306.0795, found 306.0786.

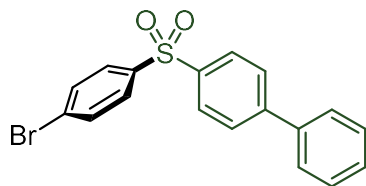

4-((4-Bromophenyl)sulfonyl)-1,1'-biphenyl (**4g**). Purification by chromatography (petroleum ether/EtOAc = 12:1) afforded **4g** as yellow oil, 34 mg, 46% yield.  $^1\text{H}$  NMR (400 MHz,  $\text{CDCl}_3$ )  $\delta$  8.04 (d,  $J = 8.5$  Hz, 2H), 7.81 (d,  $J = 8.5$  Hz, 2H), 7.71 (d,  $J = 8.8$  Hz, 2H), 7.67 – 7.61 (m, 4H), 7.54 – 7.41 (m, 3H).  $^{13}\text{C}$  NMR (125 MHz,  $\text{CDCl}_3$ )  $\delta$  147.92, 138.99, 133.08, 131.37, 131.05, 130.33, 129.30, 129.08, 127.97, 127.57, 125.99. HRMS (ESI)  $m/z$ :  $[\text{M} + \text{H}]^+$  calcd for  $\text{C}_{18}\text{H}_{14}\text{BrO}_2\text{S}$  372.9892, found 372.9896.

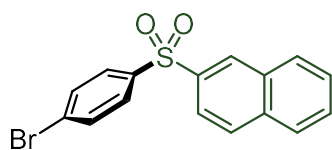

2-((4-bromophenyl)sulfonyl)naphthalene (**4h**). Purification by chromatography (petroleum ether/EtOAc = 12:1) afforded **4h** as yellow solid, m.p. 115-116 °C, 30 mg, 43% yield.  $^1\text{H}$  NMR (400 MHz,  $\text{CDCl}_3$ )  $\delta$  8.60 (s, 1H), 8.02 (d,  $J = 8.4$  Hz, 2H), 7.95 (d,  $J = 8.2$  Hz, 1H), 7.89 (dd,  $J = 8.7, 1.8$  Hz, 1H), 7.71 (ddd,  $J = 8.3, 6.9, 1.4$  Hz, 1H), 7.68 – 7.64 (m, 3H), 7.64 – 7.59 (m, 2H).  $^{13}\text{C}$  NMR (125 MHz,  $\text{CDCl}_3$ )  $\delta$  147.90, 135.95, 133.03, 132.96, 132.20, 130.30, 130.04, 129.93, 129.70, 129.48, 128.17, 127.97, 125.93, 124.40. HRMS (ESI)  $m/z$ :  $[\text{M} + \text{H}]^+$  calcd for  $\text{C}_{16}\text{H}_{12}\text{BrO}_2\text{S}$  346.9736, found 346.9732.

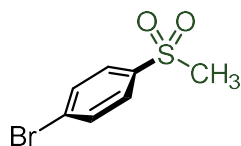

1-Bromo-4-(methylsulfonyl)benzene (**4i**). Purification by chromatography (petroleum ether/EtOAc = 8:1) afforded **4i** as yellow solid, m.p. 125-126 °C, 22 mg, 47% yield.  $^1\text{H}$  NMR (400 MHz,  $\text{CDCl}_3$ )  $\delta$  7.82 (d,  $J = 8.8$  Hz, 2H), 7.73 (d,  $J = 8.7$  Hz, 2H), 3.22 (s, 3H).  $^{13}\text{C}$  NMR (125 MHz,  $\text{CDCl}_3$ )  $\delta$  147.80, 133.30, 130.76, 125.97, 34.99. HRMS (ESI)  $m/z$ :  $[\text{M} + \text{H}]^+$  calcd for  $\text{C}_7\text{H}_8\text{BrO}_2\text{S}$  234.9423, found 234.9431.

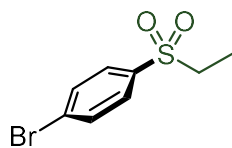

1-Bromo-4-(ethylsulfonyl)benzene (**4j**). Purification by chromatography (petroleum ether/EtOAc = 6:1) afforded **4j** as dark yellow oil, 35 mg, 70% yield.  $^1\text{H}$  NMR (500

MHz, CDCl<sub>3</sub>)  $\delta$  7.81 (d,  $J$  = 8.8 Hz, 2H), 7.72 (d,  $J$  = 8.8 Hz, 2H), 3.47 (q,  $J$  = 7.5 Hz, 2H), 1.49 (t,  $J$  = 7.5 Hz, 3H). <sup>13</sup>C NMR (125 MHz, CDCl<sub>3</sub>)  $\delta$  148.08, 133.25, 130.64, 125.84, 43.04, 7.57. HRMS (ESI)  $m/z$ :  $[M + H]^+$  calcd for C<sub>8</sub>H<sub>10</sub>BrO<sub>2</sub>S 248.9579, found 248.9576.

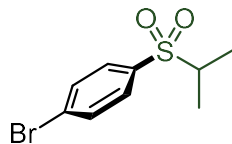

1-Bromo-4-(isopropylsulfonyl)benzene (**4k**). Purification by chromatography (petroleum ether/EtOAc = 15:1) afforded **4k** as yellow oil, 22 mg, 42% yield. <sup>1</sup>H NMR (500 MHz, CDCl<sub>3</sub>)  $\delta$  7.82 (d,  $J$  = 8.8 Hz, 2H), 7.72 (d,  $J$  = 8.7 Hz, 2H), 3.82 (p,  $J$  = 6.9 Hz, 1H), 1.54 (s, 3H), 1.52 (s, 3H). <sup>13</sup>C NMR (125 MHz, CDCl<sub>3</sub>)  $\delta$  148.40, 133.24, 130.57, 125.80, 50.95, 16.12. HRMS (ESI)  $m/z$ :  $[M + H]^+$  calcd for C<sub>9</sub>H<sub>12</sub>BrO<sub>2</sub>S 262.9736, found 262.9728.

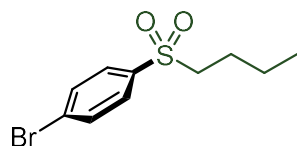

1-Bromo-4-(butylsulfonyl)benzene (**4l**). Purification by chromatography (petroleum ether/EtOAc = 12:1) afforded **4l** as light yellow oil, 23 mg, 41% yield. <sup>1</sup>H NMR (400 MHz, CDCl<sub>3</sub>)  $\delta$  7.81 (d,  $J$  = 8.7 Hz, 2H), 7.72 (d,  $J$  = 8.7 Hz, 2H), 3.50 – 3.37 (m, 2H), 1.90 (tt,  $J$  = 7.9, 6.5 Hz, 2H), 1.52 (h,  $J$  = 7.4 Hz, 2H), 0.97 (t,  $J$  = 7.4 Hz, 3H). <sup>13</sup>C NMR (125 MHz, CDCl<sub>3</sub>)  $\delta$  148.05, 133.25, 130.60, 125.86, 47.94, 24.67, 21.90, 13.60. HRMS (ESI)  $m/z$ :  $[M + H]^+$  calcd for C<sub>10</sub>H<sub>14</sub>BrO<sub>2</sub>S 276.9892, found 276.9880.

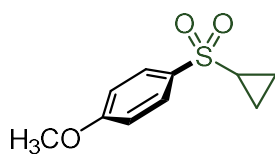

1-(Cyclopropylsulfonyl)-4-methoxybenzene (**4m**). Purification by chromatography (petroleum ether/EtOAc = 4:1) afforded **4m** as yellow oil, 16 mg, 38% yield. <sup>1</sup>H NMR (500 MHz, DMSO-*d*<sub>6</sub>)  $\delta$  7.97 (d,  $J$  = 9.1 Hz, 2H), 7.22 (d,  $J$  = 9.0 Hz, 2H), 3.93 (s, 3H), 2.99 (tt,  $J$  = 7.9, 4.8 Hz, 1H), 1.35 – 1.18 (m, 2H), 1.21 – 1.12 (m, 2H). <sup>13</sup>C NMR (125 MHz, DMSO-*d*<sub>6</sub>)  $\delta$  165.47, 142.96, 126.97, 115.47, 56.17, 25.30, 5.32. HRMS (ESI)  $m/z$ :  $[M + H]^+$  calcd for C<sub>10</sub>H<sub>13</sub>O<sub>3</sub>S 213.0580, found 213.0576.

## 8. Mechanistic Studies

### 8.1 TEMPO radical trapping experiments

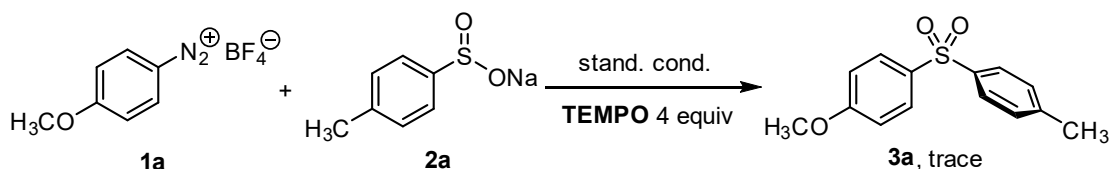

To a solution of **1a** (0.3 mmol, 1.5 equiv) in CH<sub>3</sub>CN (1 mL, 0.2 M) was added sodium *p*-toluenesulfonate **2a** (0.2 mmol, 1 equiv), NaHCO<sub>3</sub> (0.04 mmol) and TEMPO (0.8 mmol, 4 equiv) in an oven-dried 8 mL reaction vial. The mixture was bubbled with Ar for 2 min, and the reaction executed under argon atmosphere. The reaction was then stirred and photolyzed with 18 W 400 nm purple LEDs at distances to the vial of approximately 1 cm for 12 h. The reaction mixture was then analyzed by HRMS.

The HRMS spectrum showed evidence for the formation of **5** (an adduct of TEMPO and aryl radical) and **6** (an adduct of TEMPO and sulfonyl radical).

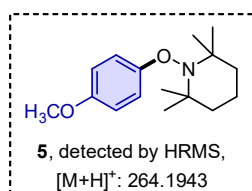

Spectrum from 46.wiff (sample 1) - Sample046, Experiment 1, +TOF MS (50 - 800) from 0.091 to 0.108 min

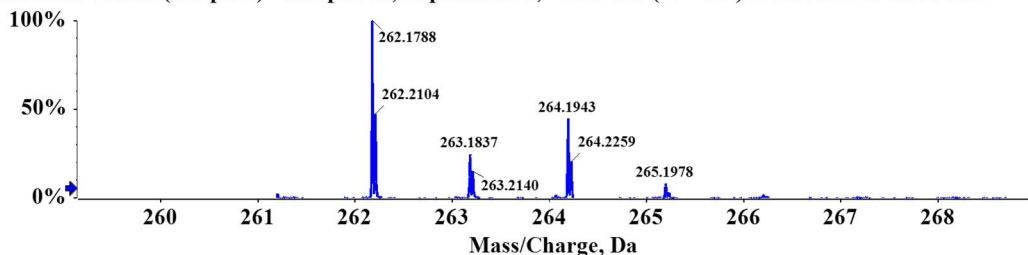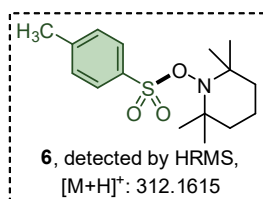

Spectrum from 46.wiff (sample 1) - Sample046, Experiment 1, +TOF MS (50 - 800) from 0.068 to 0.077 min

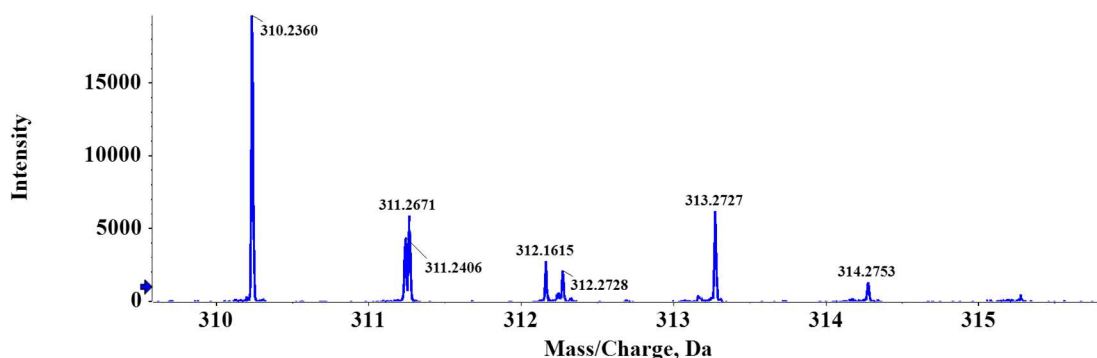

## 8.2 UV/vis absorption spectrometry between **1a** and **2a**.

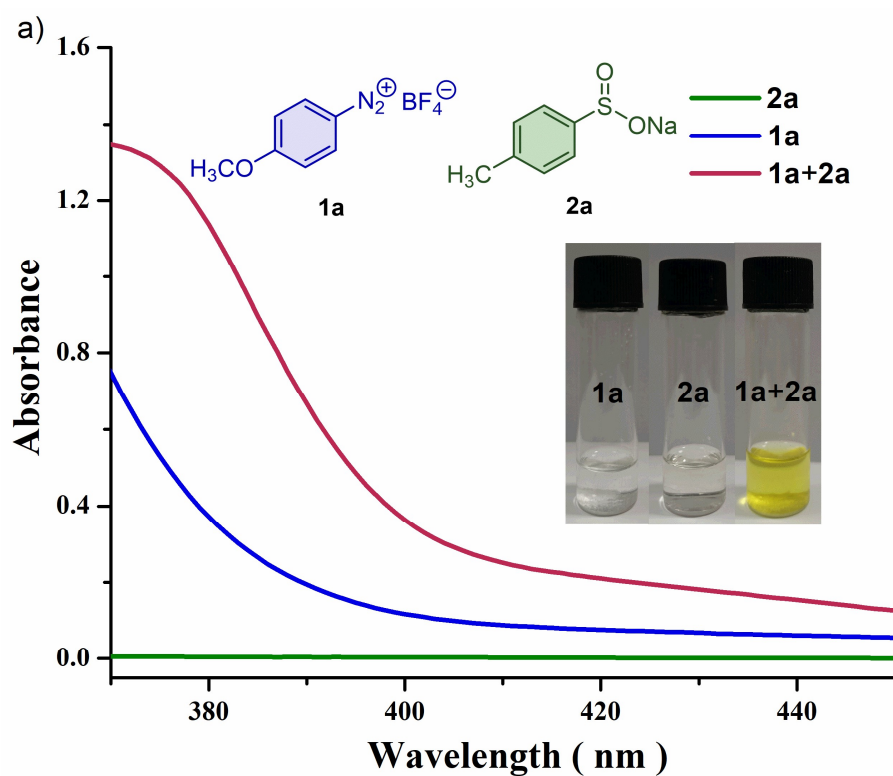

UV/vis absorption spectra between **1a** (0.02 M) and **2a** (0.02 M) in 1 mL CH<sub>3</sub>CN were recorded in 1 cm path quartz cuvettes using a Shimadzu UV-1800 UV/Vis spectrometer.

### 8.3 Stoichiometry of the EDA complex **1a+2a**

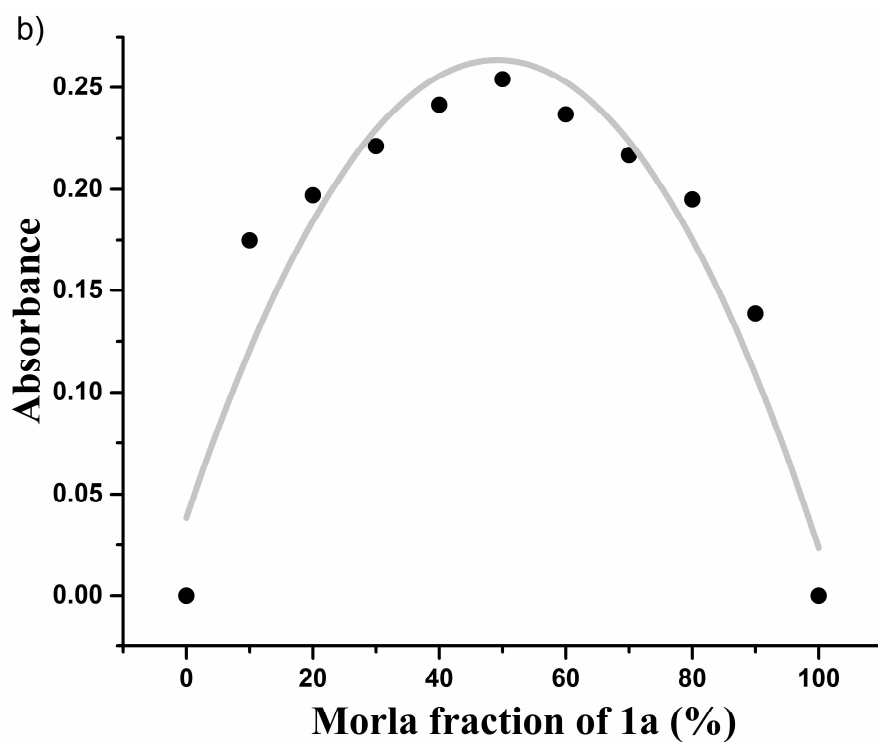

The stoichiometry of the EDA complexes **1a+2a** was calculated using the Job's plot method. The Job's plot of the EDA complex between **1a** and **2a** was calculated



measuring the absorption of Acetonitrile solutions at 390 nm with different donor/acceptor ratios with constant concentration (0.02 M) of the two components. The absorbance values were plotted against the molar fraction (%) of **1a**. The Job's plot analysis of the EDA complex between **1a** and **2a** showed a maximal absorbance at 50% molar fraction of **1a** indicated the 1:1 stoichiometry of the EDA complex in solution.

#### 8.4 Substrate replaced reaction

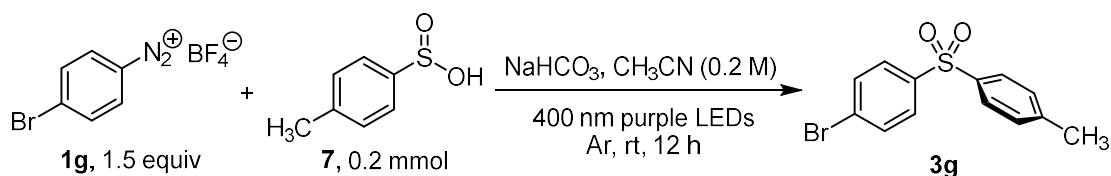

| $\text{NaHCO}_3$ (X equiv) | <b>3g</b> |
|----------------------------|-----------|
| none                       | trace     |
| 0.2                        | 16%       |
| 1.0                        | 55%       |
| 2.0                        | 73%       |

To a solution of **1g** (0.3 mmol, 1.5 equiv) in  $\text{CH}_3\text{CN}$  (1 mL, 0.2 M) was added *p*-toluenesulfonic acid **7** (0.2 mmol, 1 equiv) in an oven-dried 8 mL reaction vial. The  $\text{NaHCO}_3$  was added in 0-2 equivalents. The mixture was bubbled with Ar for 2 min, and the reaction executed under argon atmosphere. The reaction was then stirred and photolyzed with 18 W 400 nm purple LEDs at distances to the vial of approximately 1 cm for 12 h. Afterwards, the mixture was purified by flash chromatography on silica gel to afford **3g** as yellow solid.

## 9. $^1\text{H}$ NMR and $^{13}\text{C}$ NMR Spectra

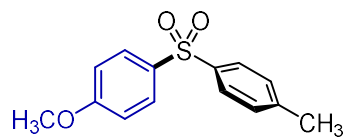

$^1\text{H}$  NMR (400 MHz,  $\text{CDCl}_3$ )

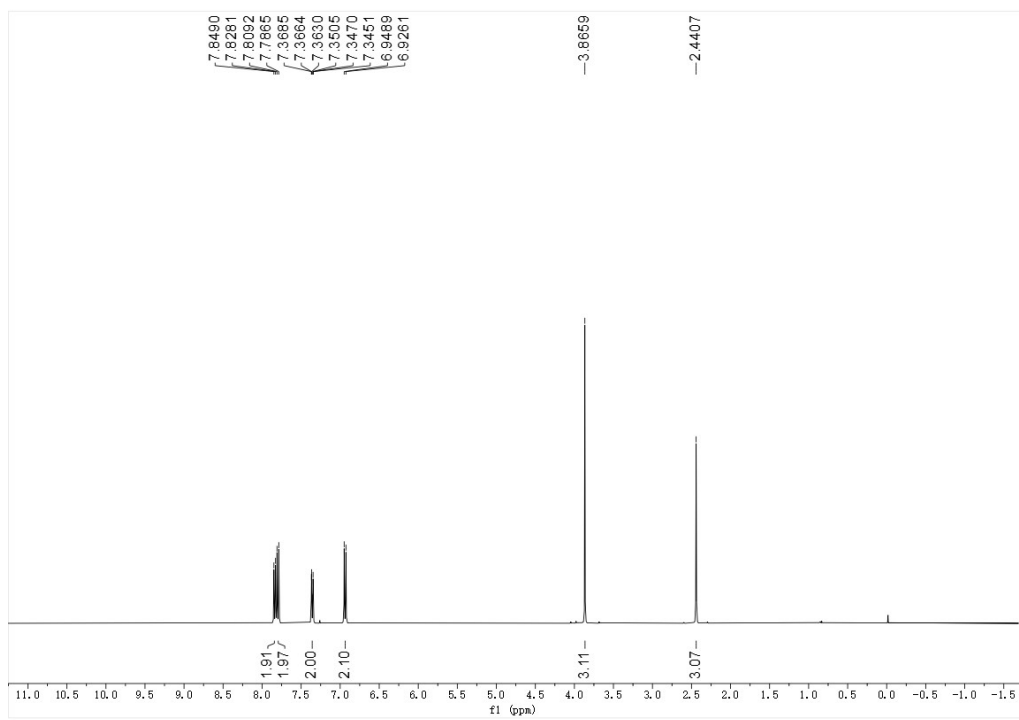

$^{13}\text{C}$  NMR (100 MHz,  $\text{CDCl}_3$ )

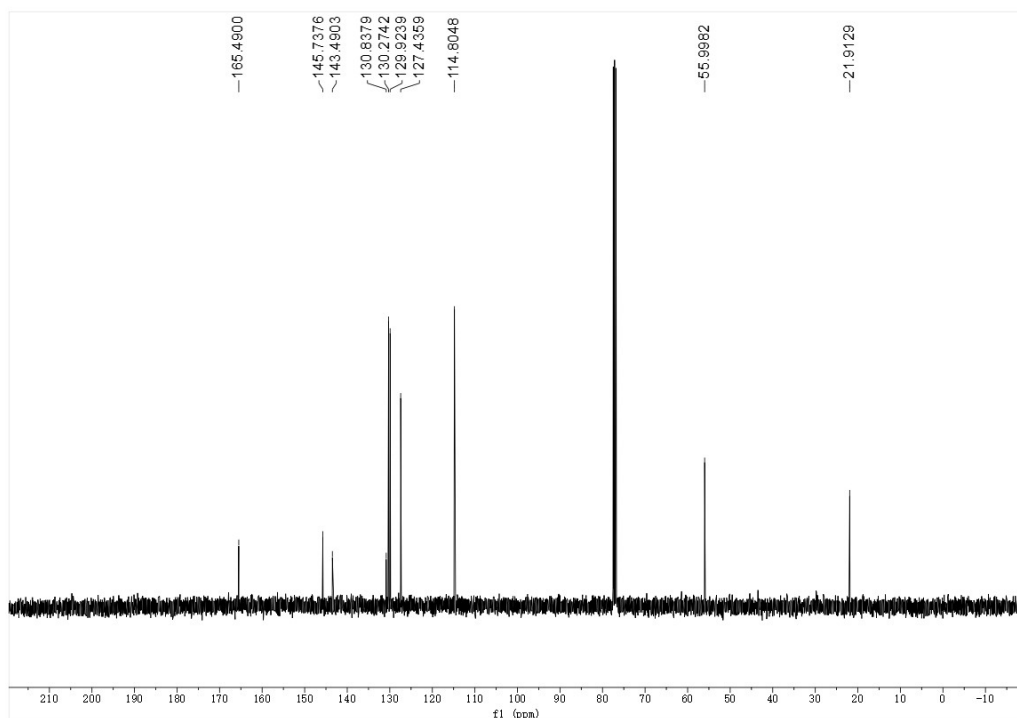

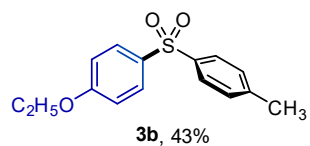

$^1\text{H}$  NMR (400 MHz,  $\text{CDCl}_3$ )

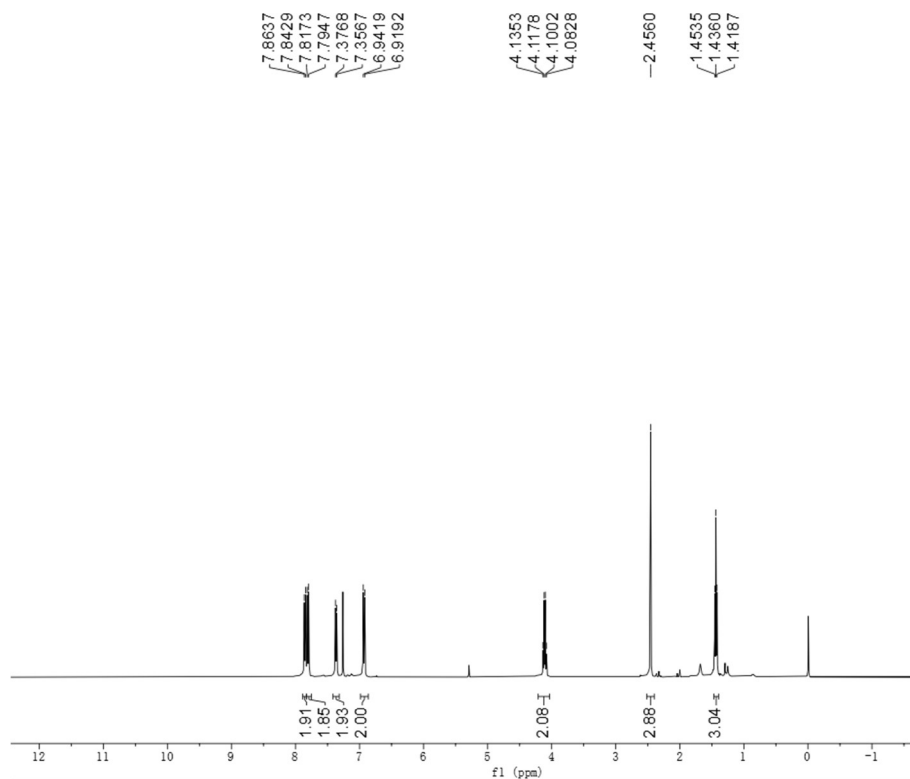

$^{13}\text{C}$  NMR (100 MHz,  $\text{CDCl}_3$ )

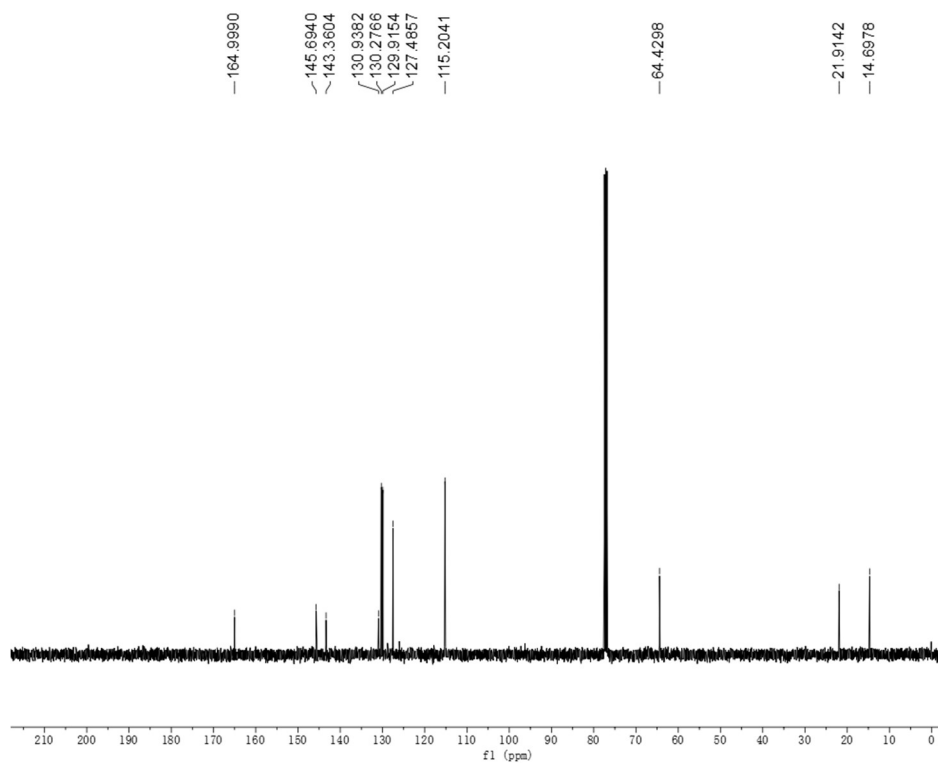

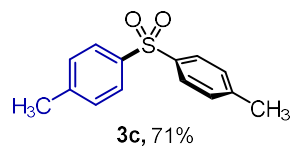

$^1\text{H}$  NMR (500 MHz,  $\text{CDCl}_3$ )

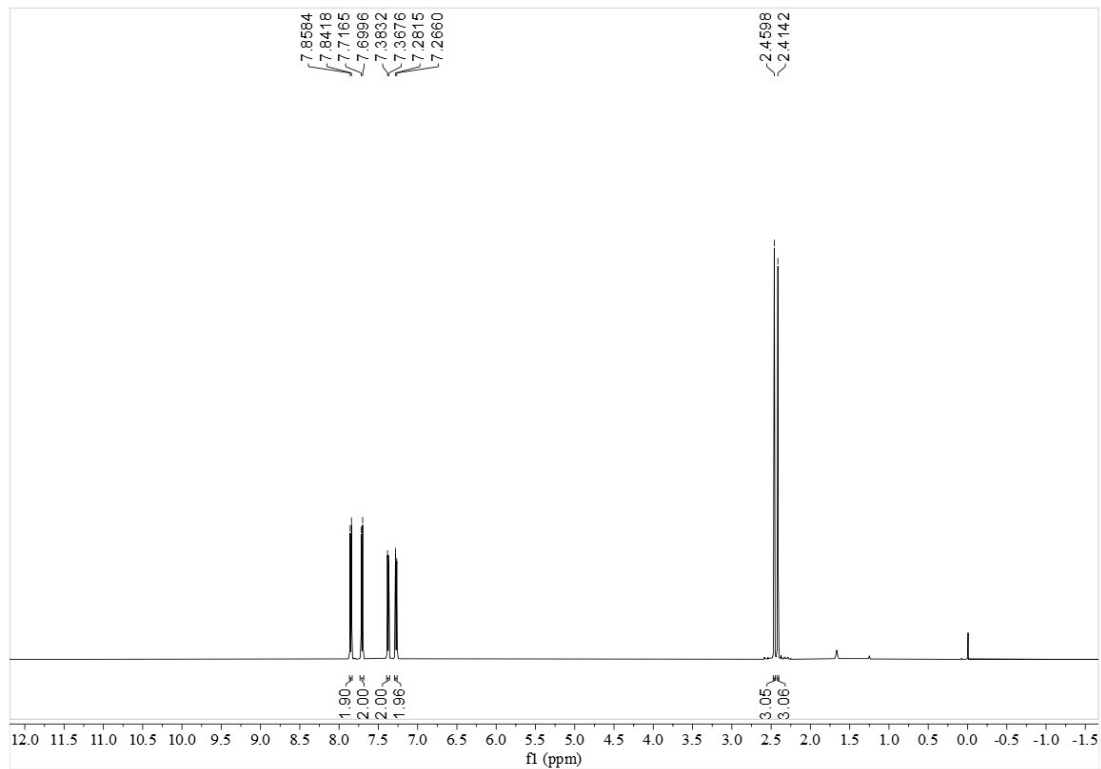

$^{13}\text{C}$  NMR (125 MHz,  $\text{CDCl}_3$ )

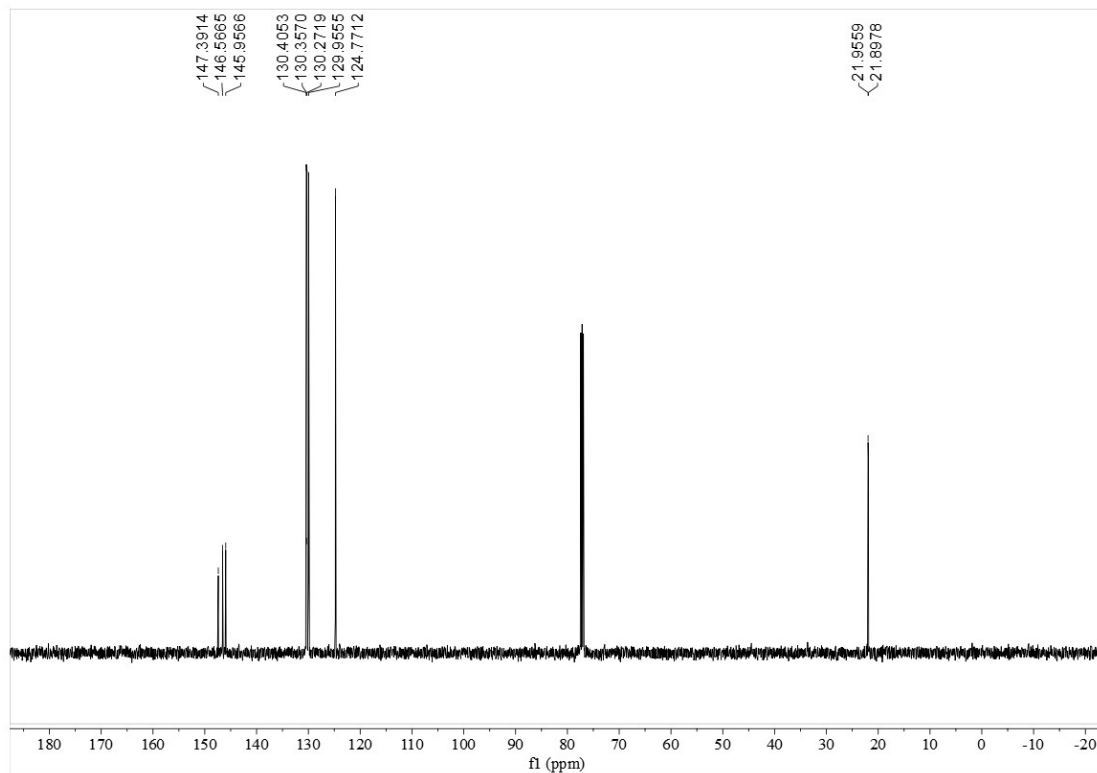

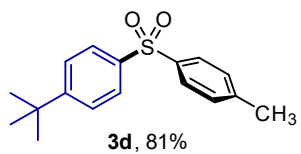

<sup>1</sup>H NMR (400 MHz, CDCl<sub>3</sub>)

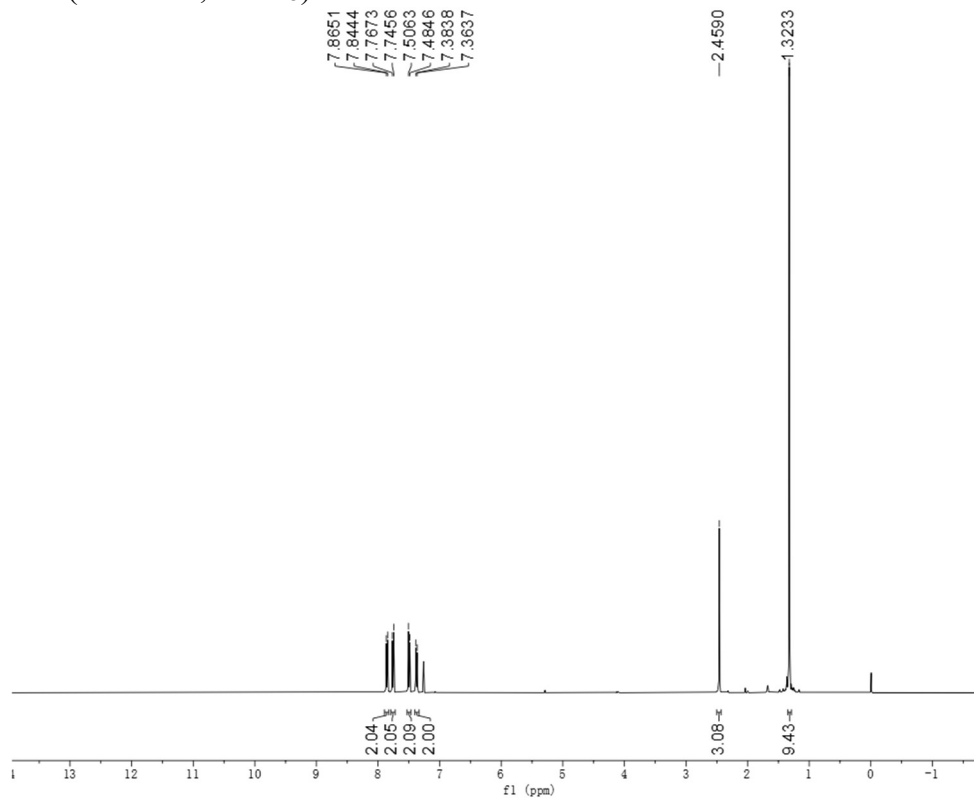

<sup>13</sup>C NMR (100 MHz, CDCl<sub>3</sub>)

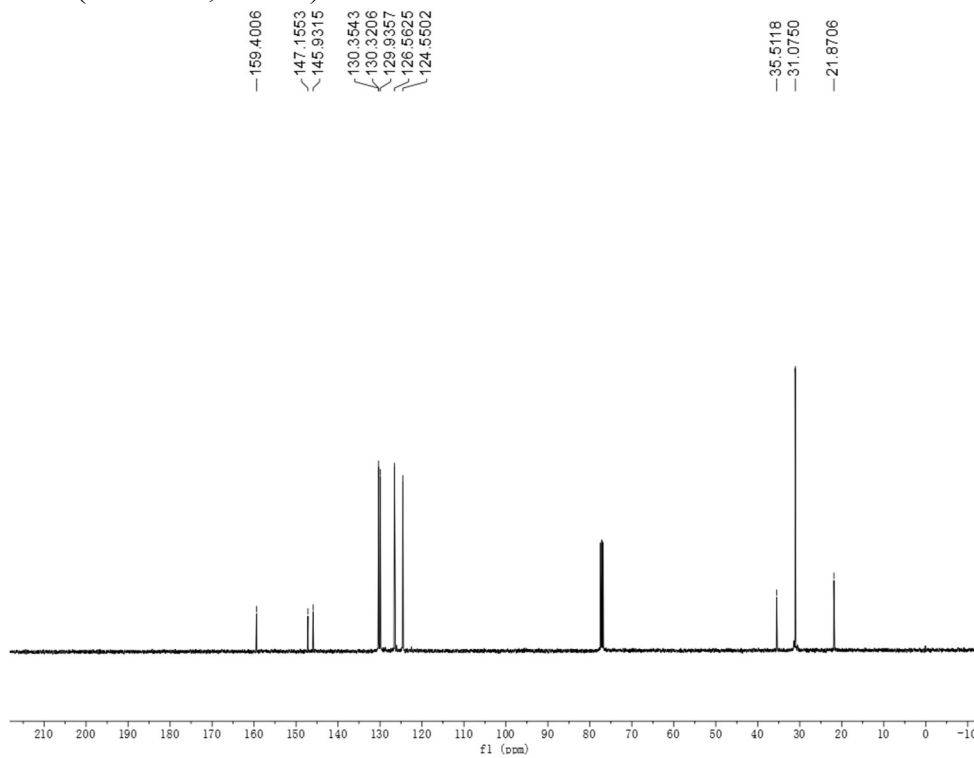

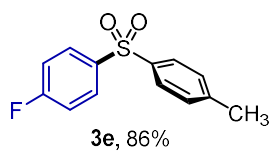

$^1\text{H}$  NMR (400 MHz,  $\text{CDCl}_3$ )

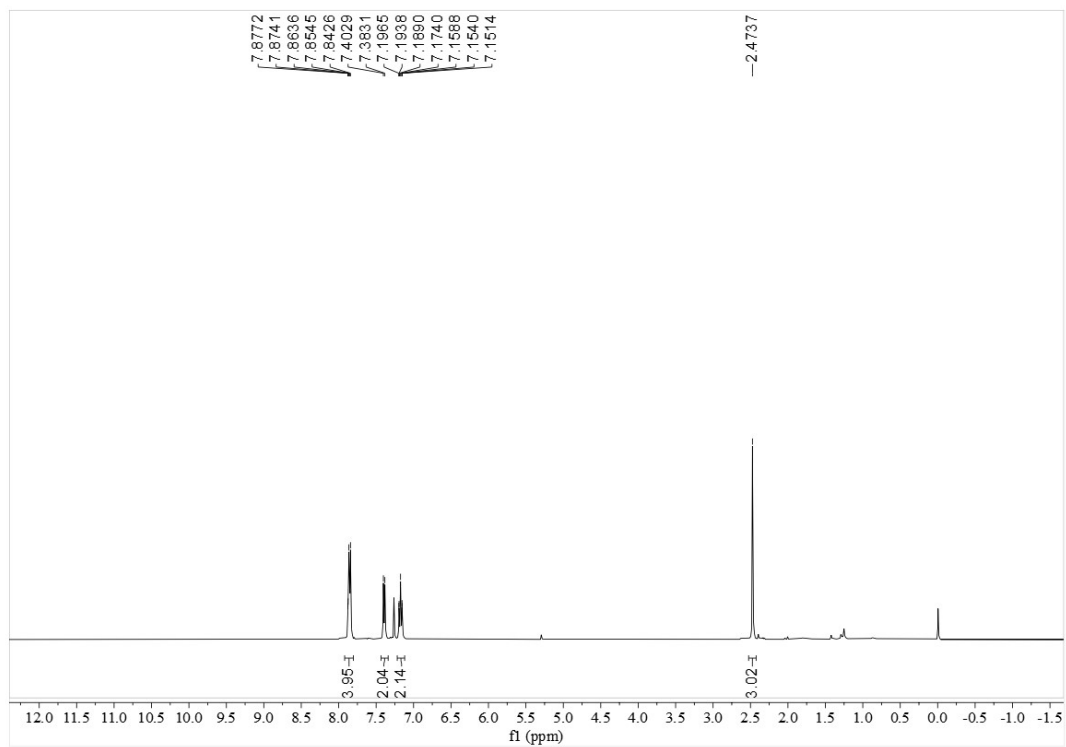

$^{13}\text{C}$  NMR (125 MHz,  $\text{DMSO}-d_6$ )

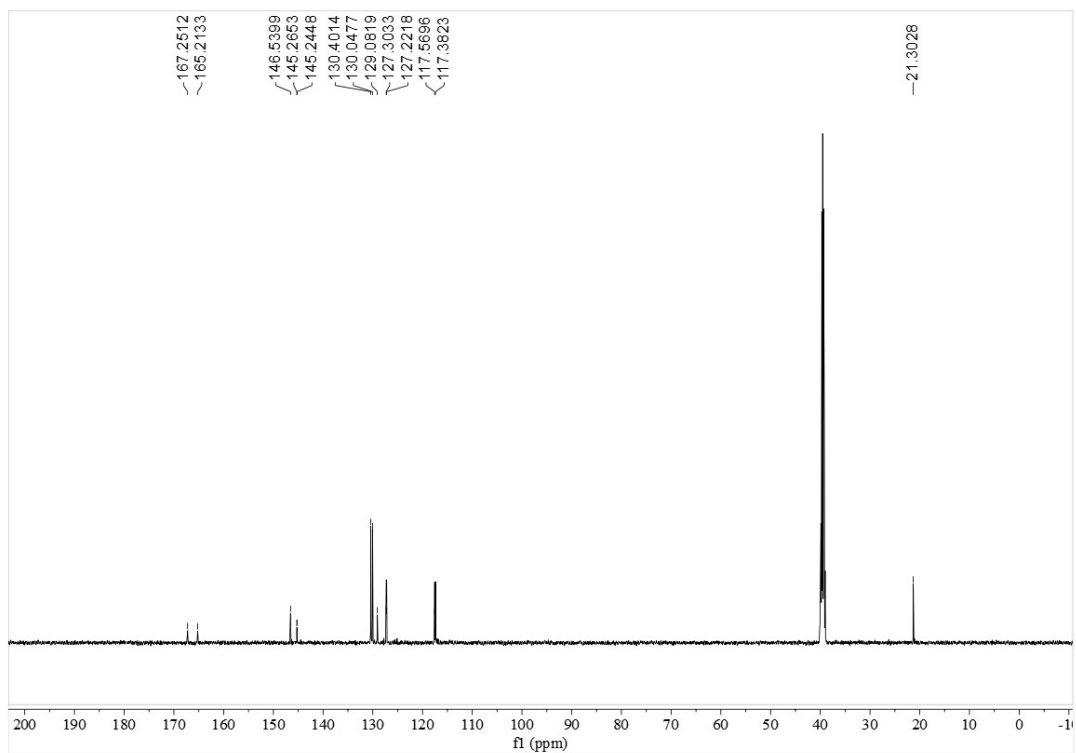

$^{19}\text{F}$  NMR (471 MHz,  $\text{DMSO-}d_6$ )

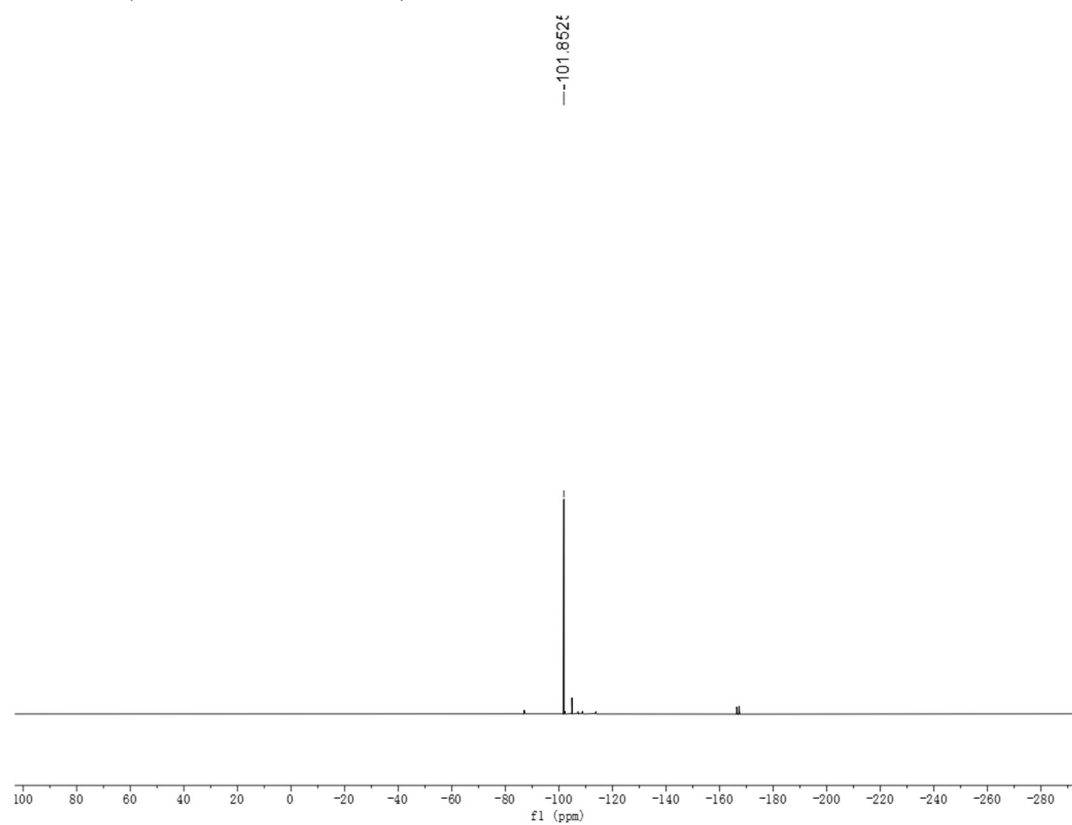

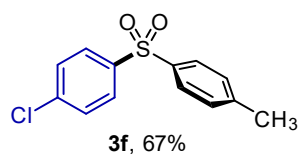

<sup>1</sup>H NMR (400 MHz, CDCl<sub>3</sub>)

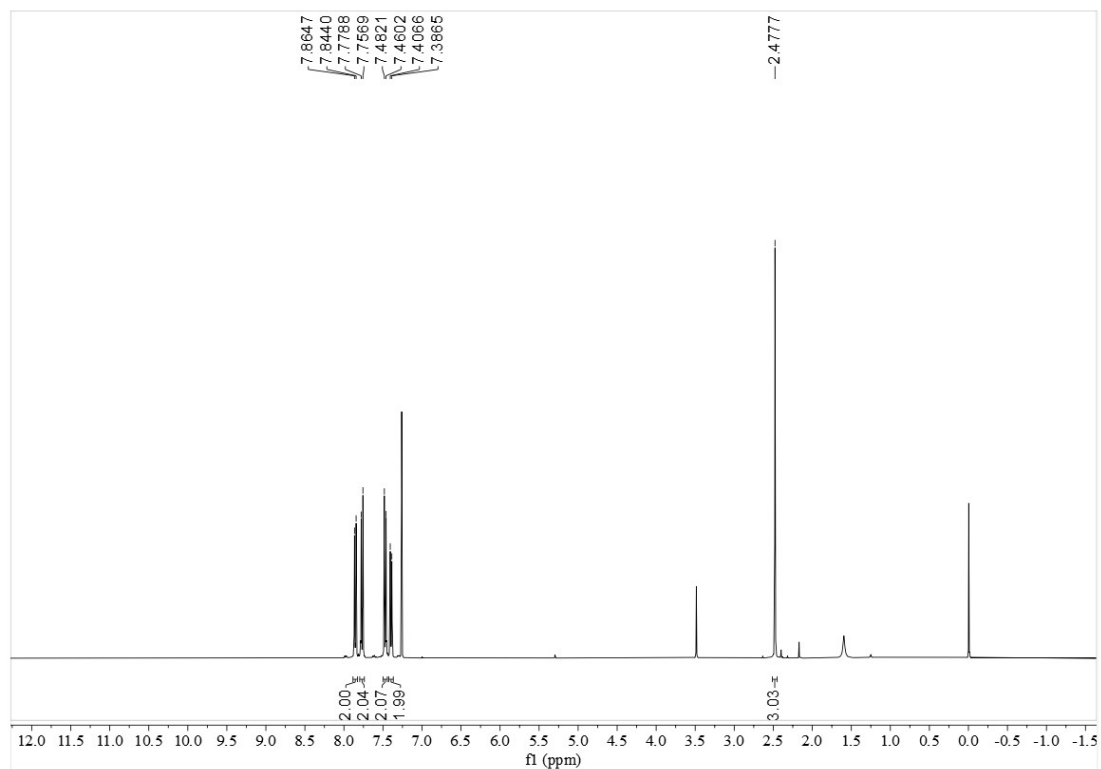

<sup>13</sup>C NMR (100 MHz, CDCl<sub>3</sub>)

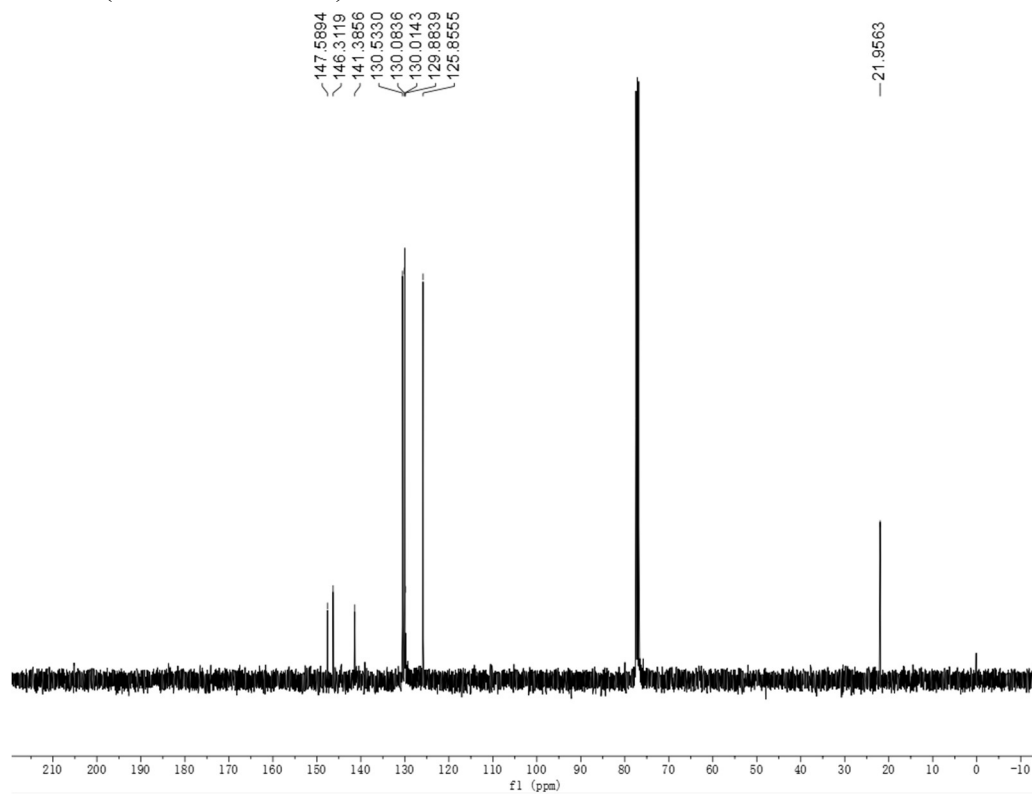



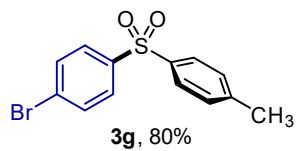

$^1\text{H NMR}$  (400 MHz,  $\text{CDCl}_3$ )

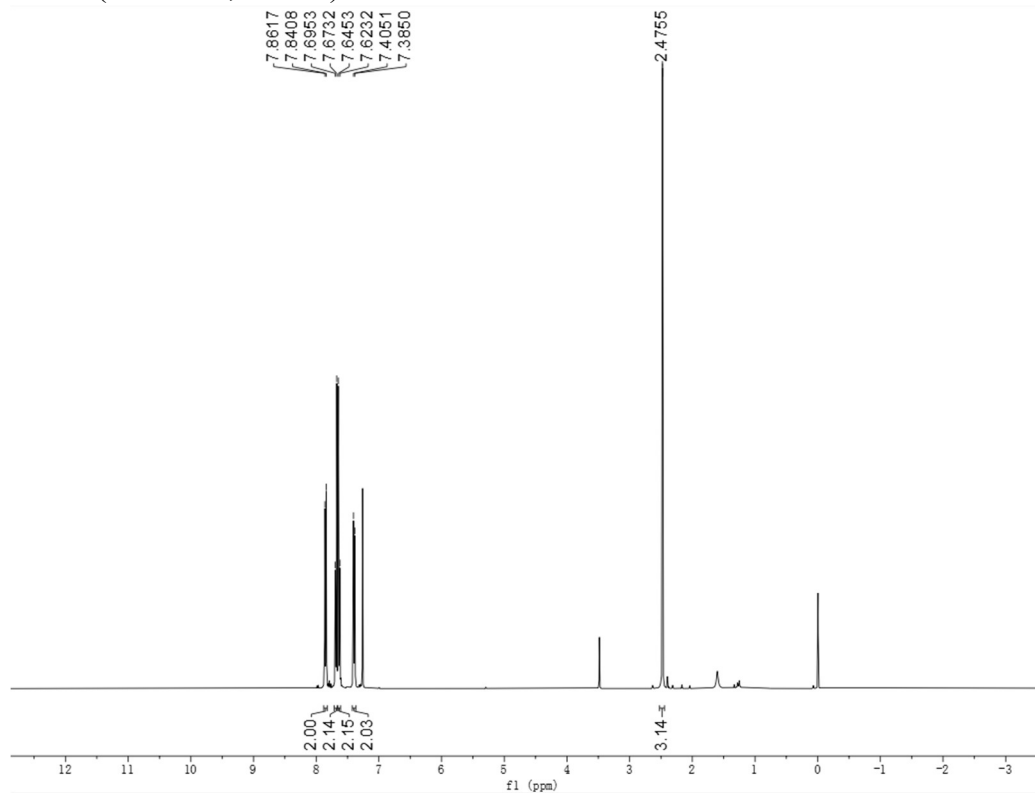

$^{13}\text{C NMR}$  (100 MHz,  $\text{CDCl}_3$ )

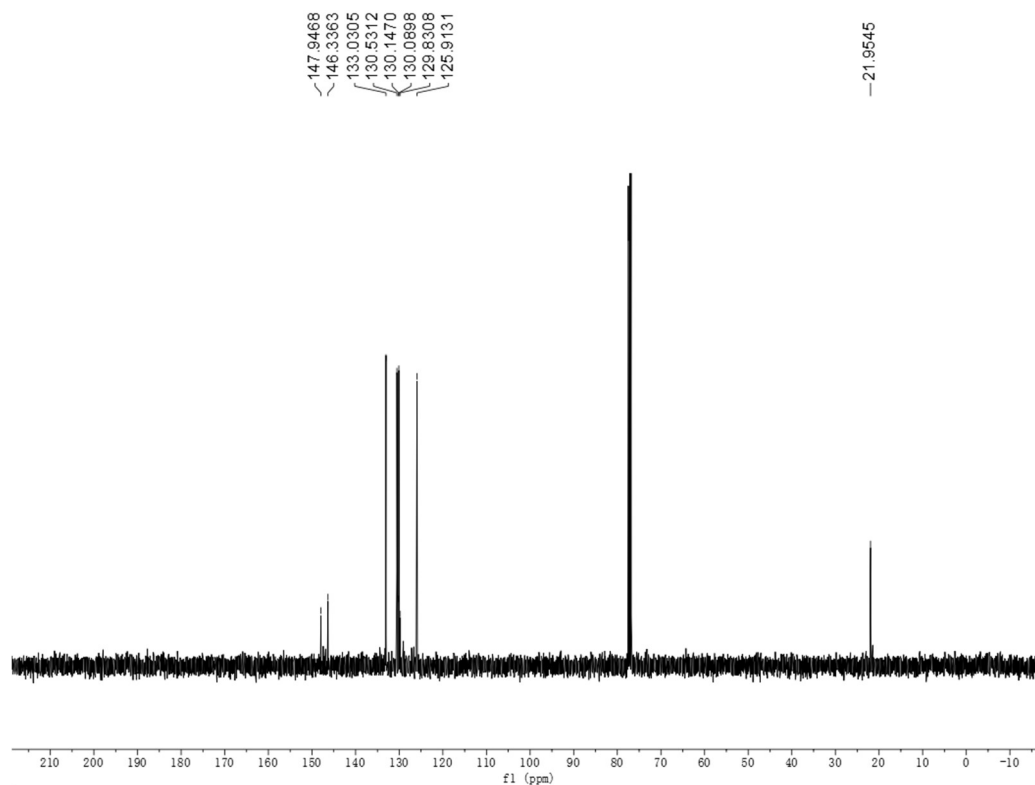

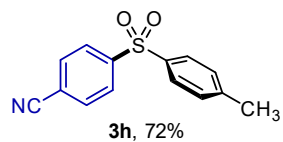

$^1\text{H NMR}$  (400 MHz,  $\text{CDCl}_3$ )

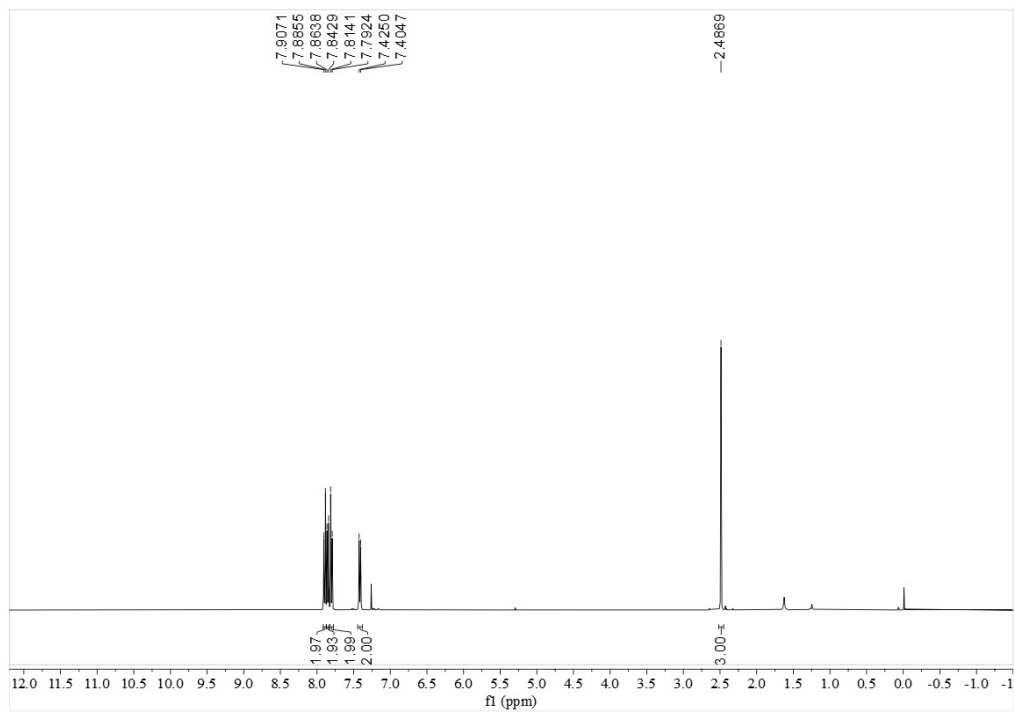

$^{13}\text{C NMR}$  (100 MHz,  $\text{CDCl}_3$ )

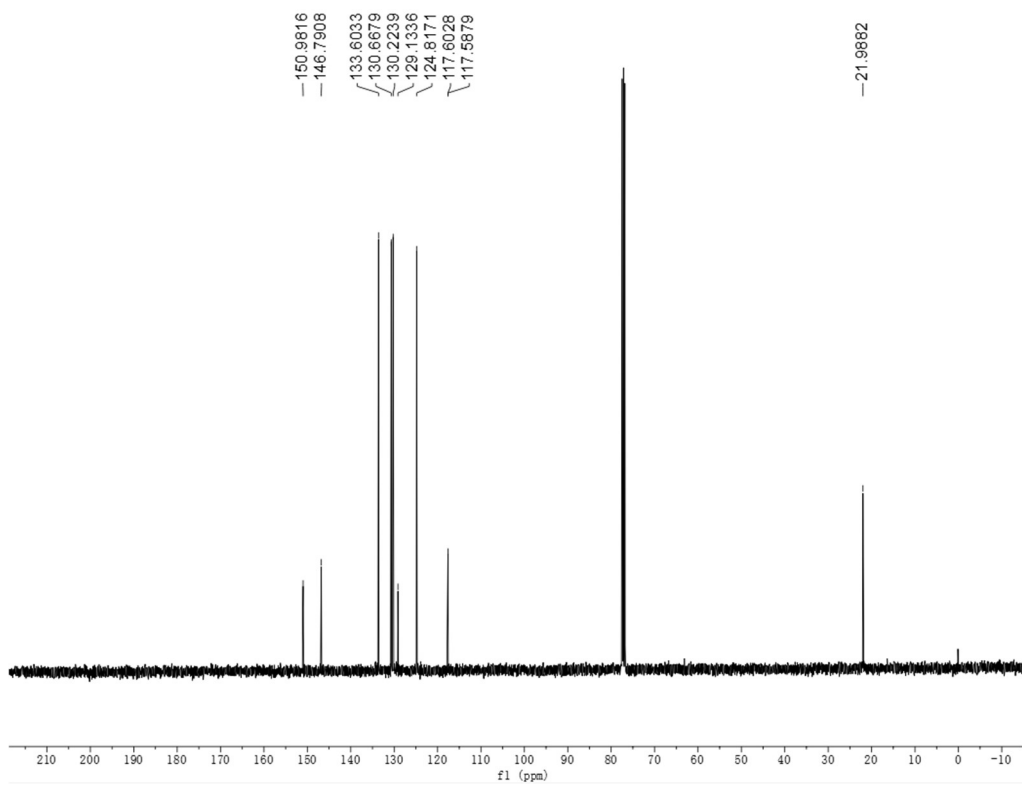

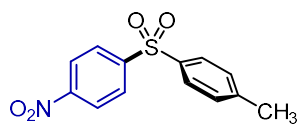

3i, 60%

<sup>1</sup>H NMR (400 MHz, CDCl<sub>3</sub>)

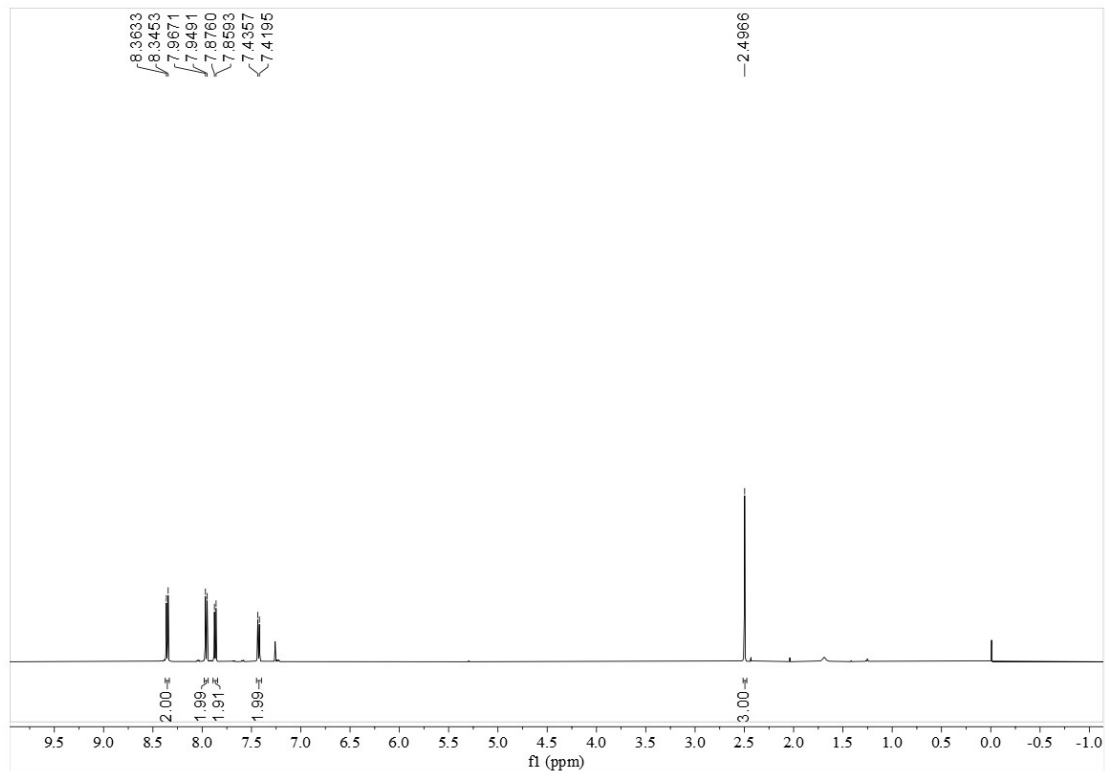

<sup>13</sup>C NMR (100 MHz, CDCl<sub>3</sub>)

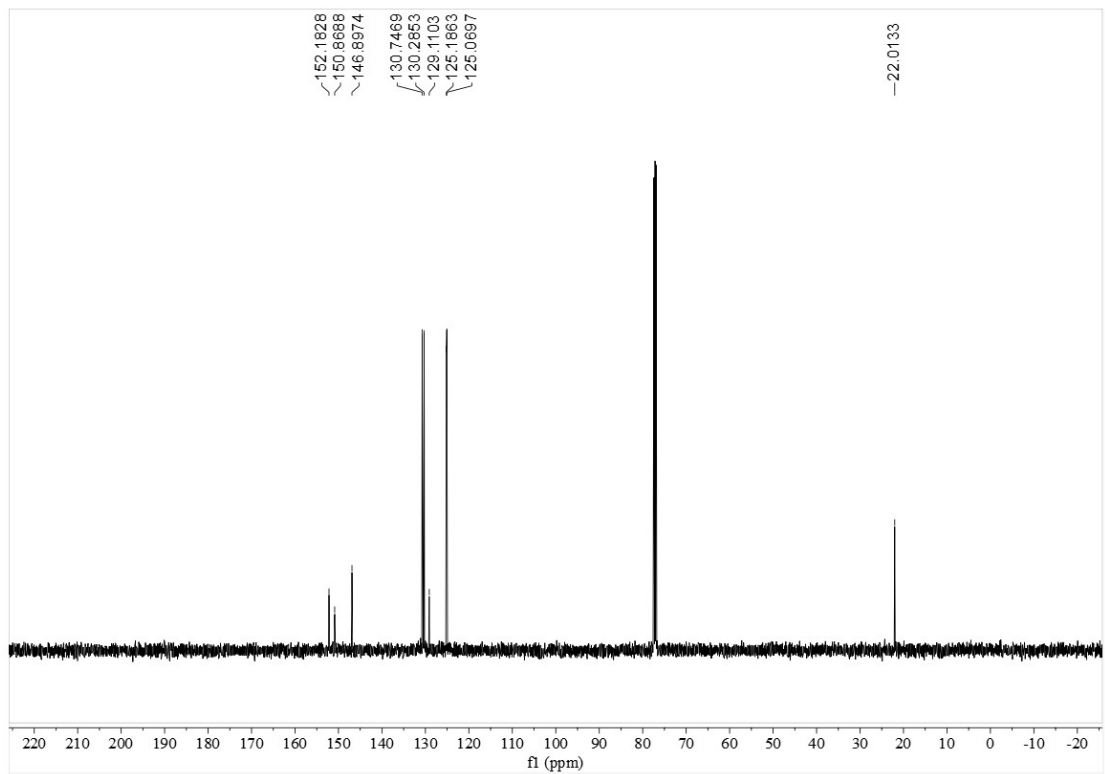

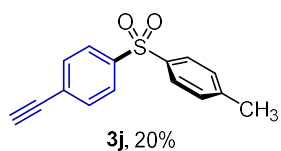

$^1\text{H NMR}$  (400 MHz,  $\text{CDCl}_3$ )

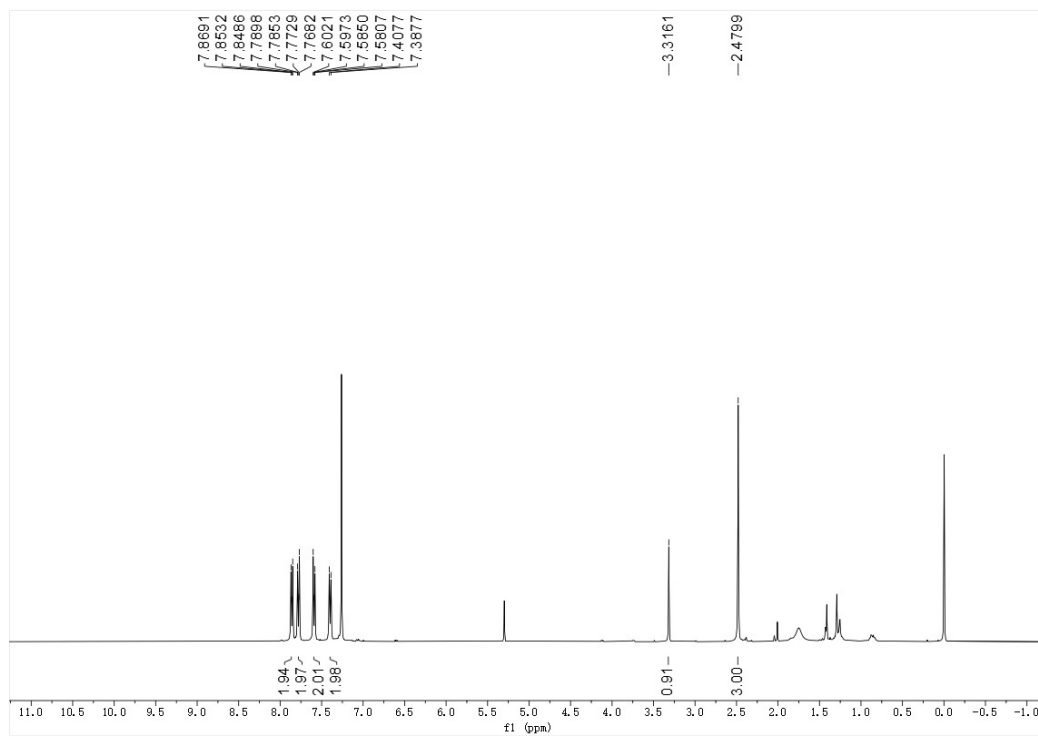

$^{13}\text{C NMR}$  (125 MHz,  $\text{CDCl}_3$ )

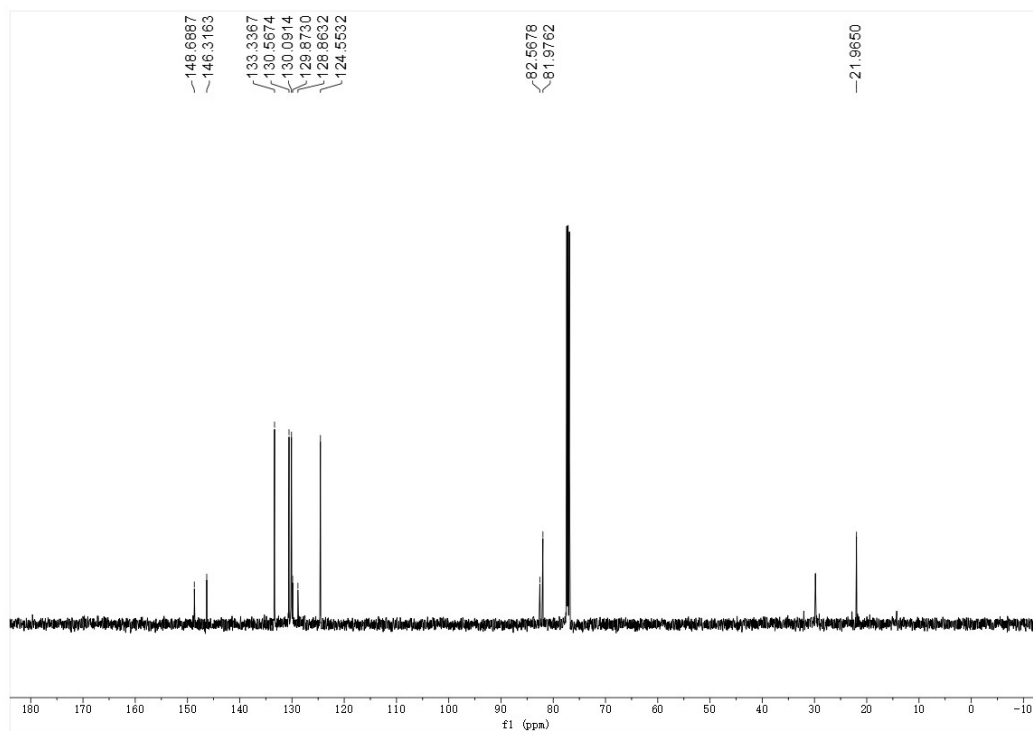

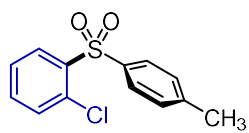

**3k**, 79%

$^1\text{H}$  NMR (400 MHz,  $\text{CDCl}_3$ )

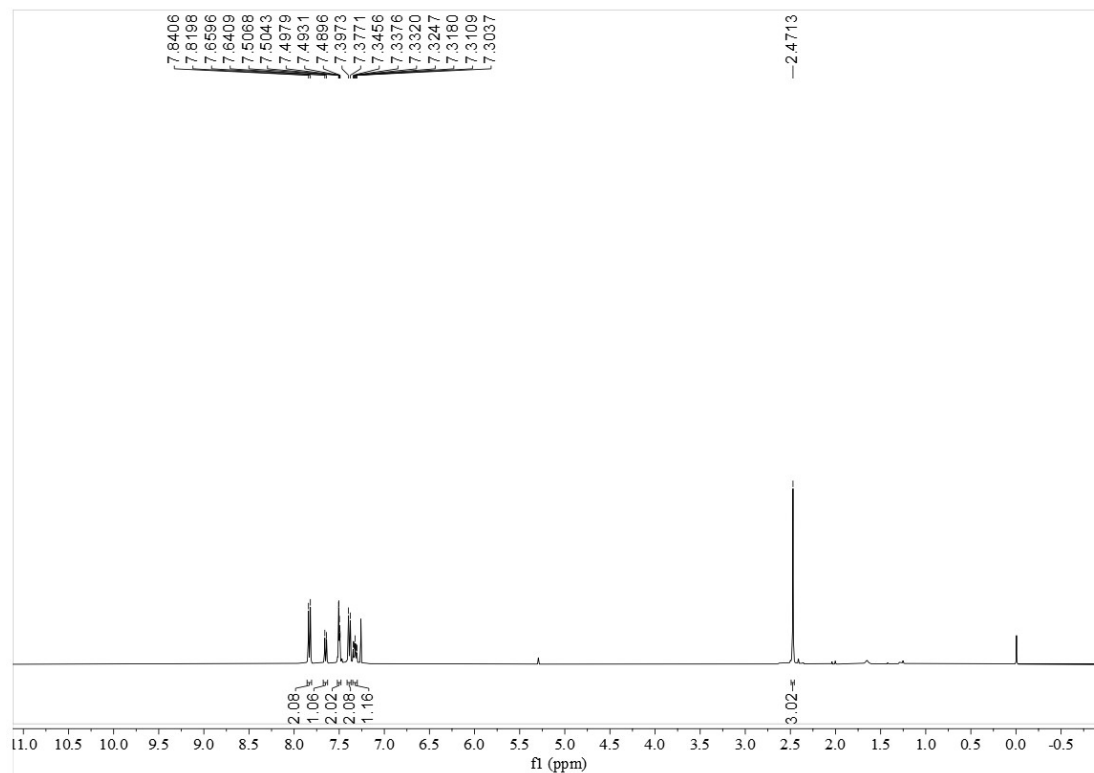

$^{13}\text{C}$  NMR (125 MHz,  $\text{CDCl}_3$ )

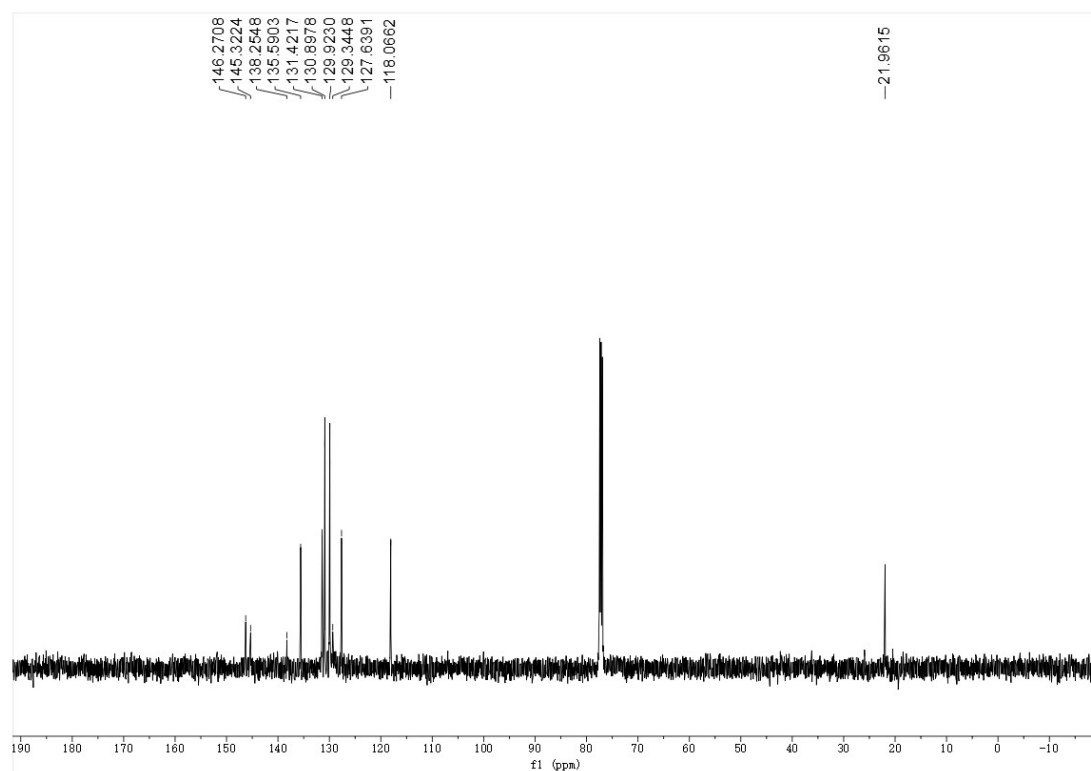

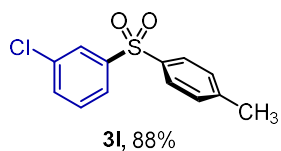

$^1\text{H NMR}$  (500 MHz,  $\text{CDCl}_3$ )

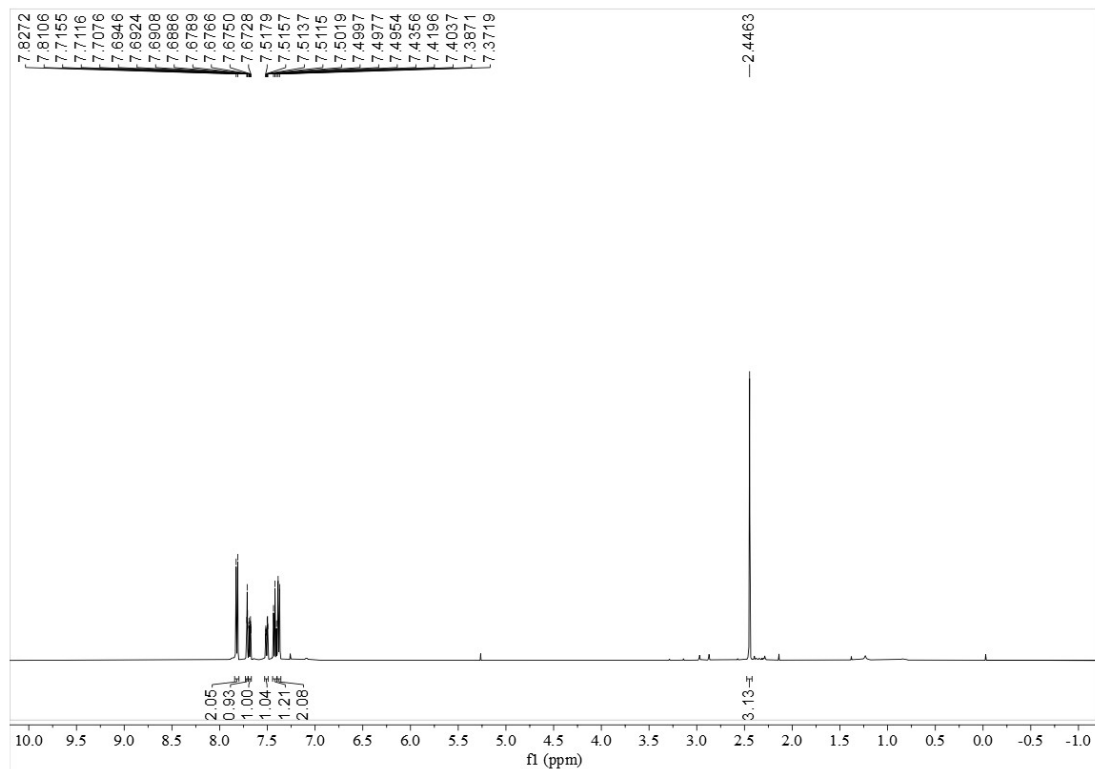

$^{13}\text{C NMR}$  (125 MHz,  $\text{CDCl}_3$ )

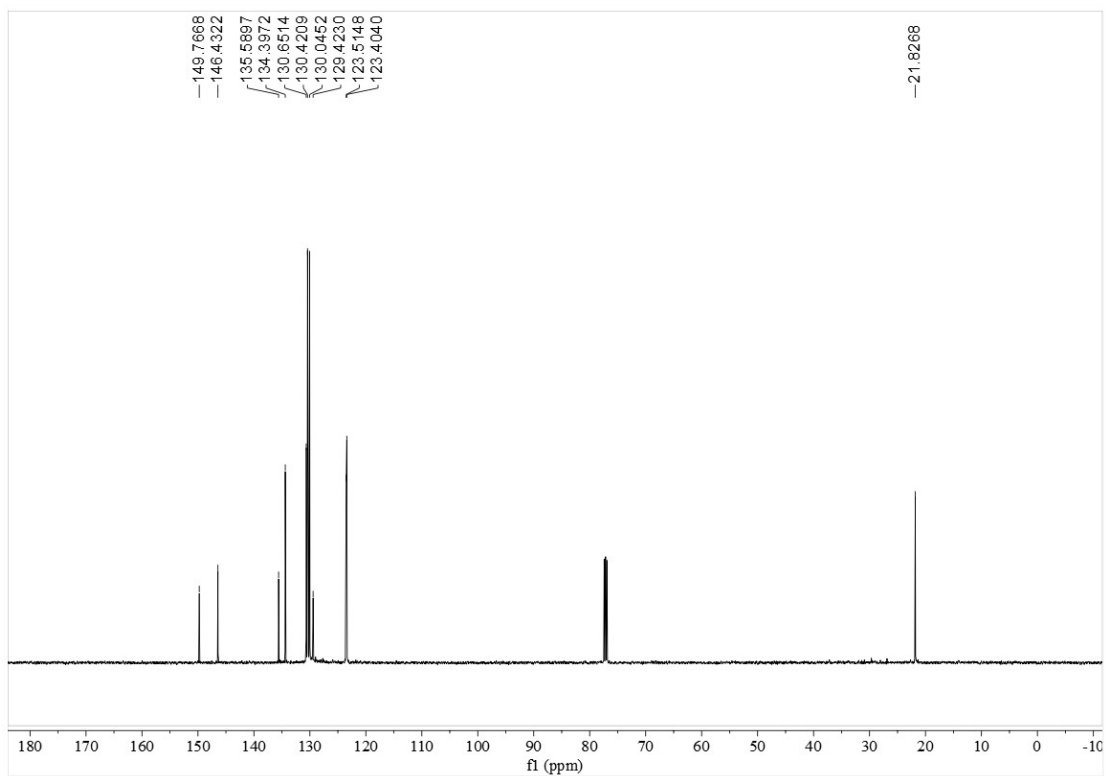

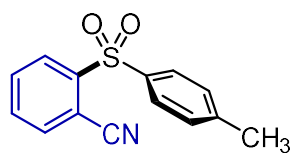

**3m**, 64%

$^1\text{H}$  NMR (500 MHz,  $\text{CDCl}_3$ )

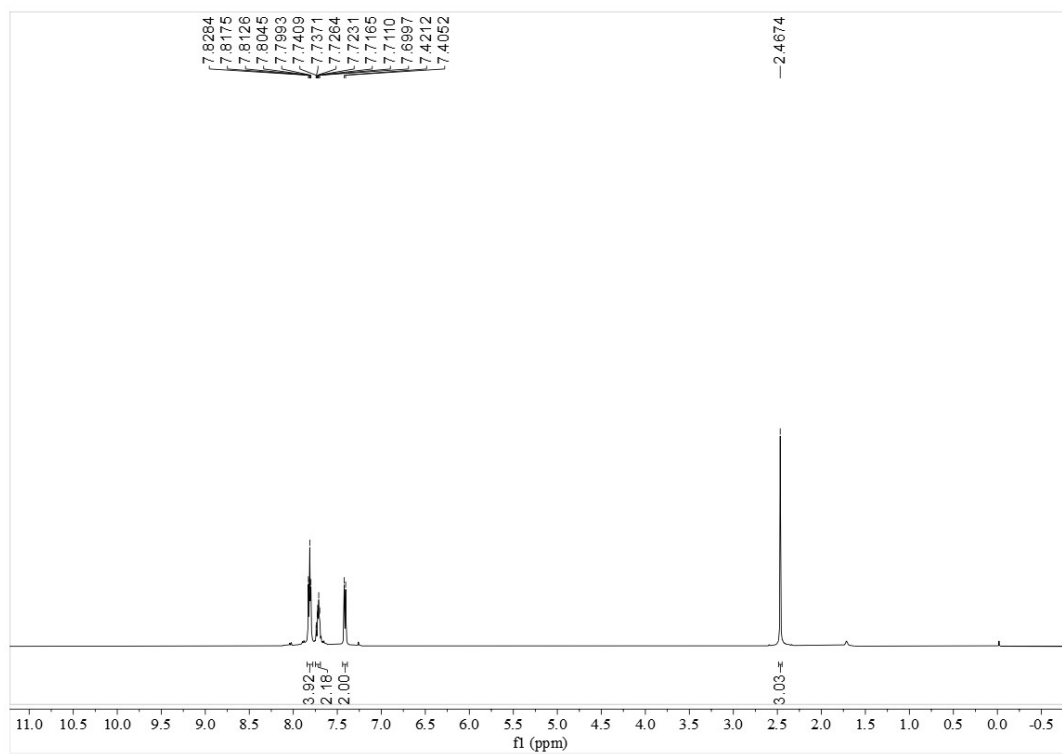

$^{13}\text{C}$  NMR (125 MHz,  $\text{CDCl}_3$ )

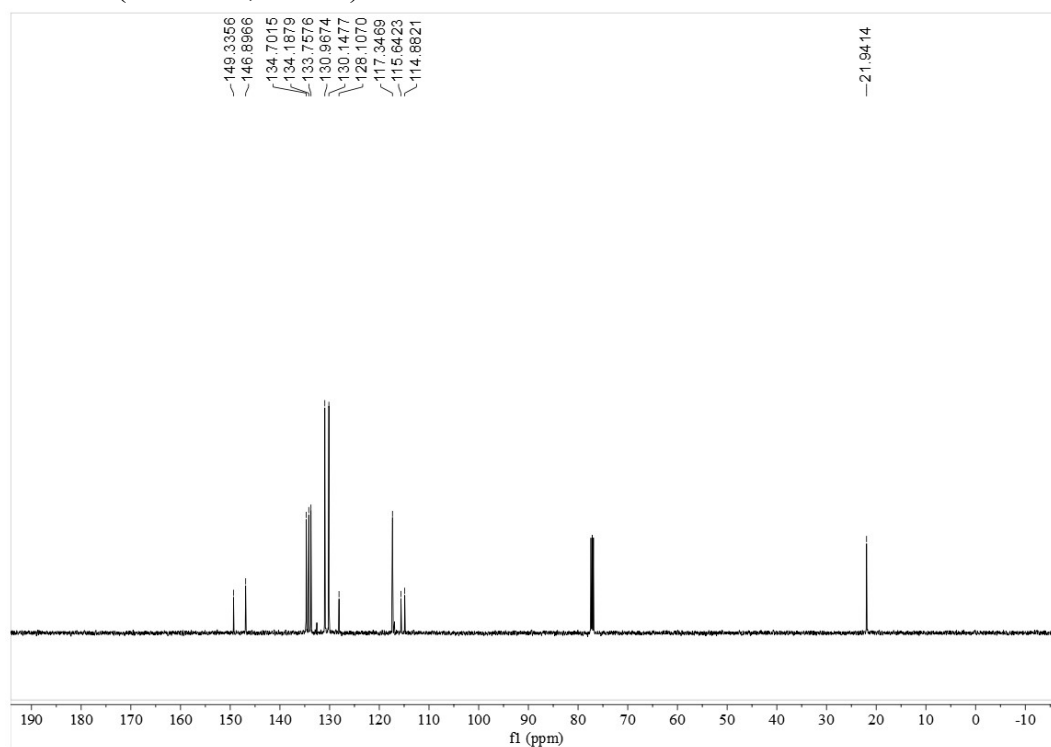

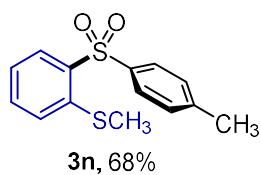

$^1\text{H NMR}$  (400 MHz,  $\text{CDCl}_3$ )

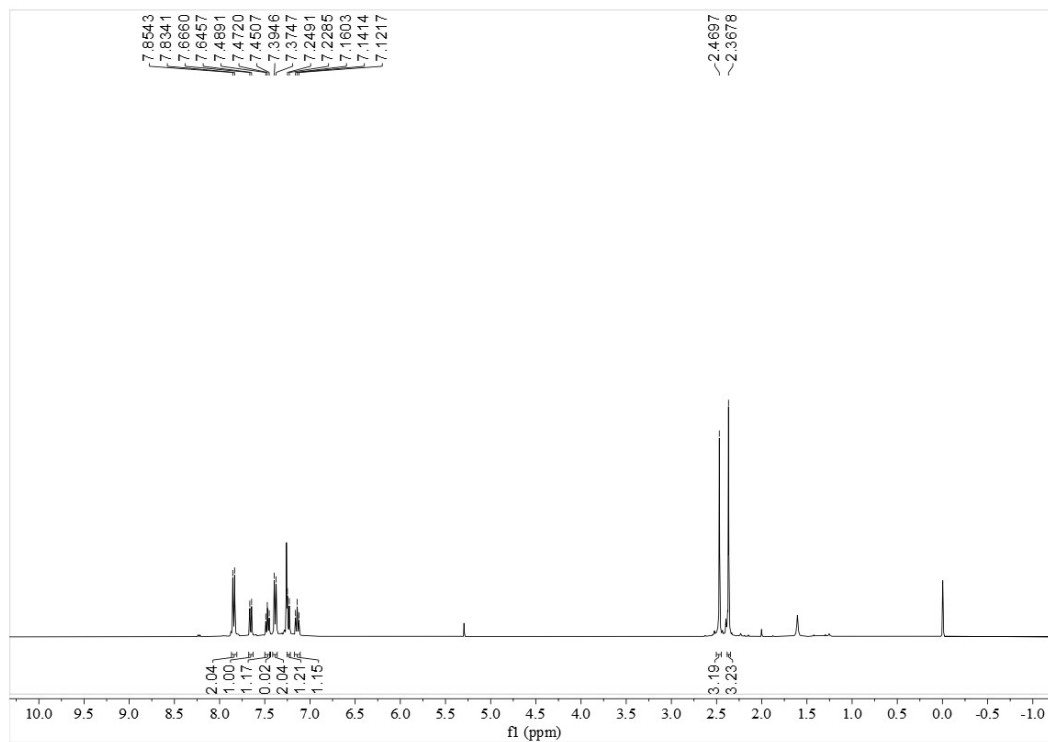

$^{13}\text{C NMR}$  (125 MHz,  $\text{DMSO-}d_6$ )

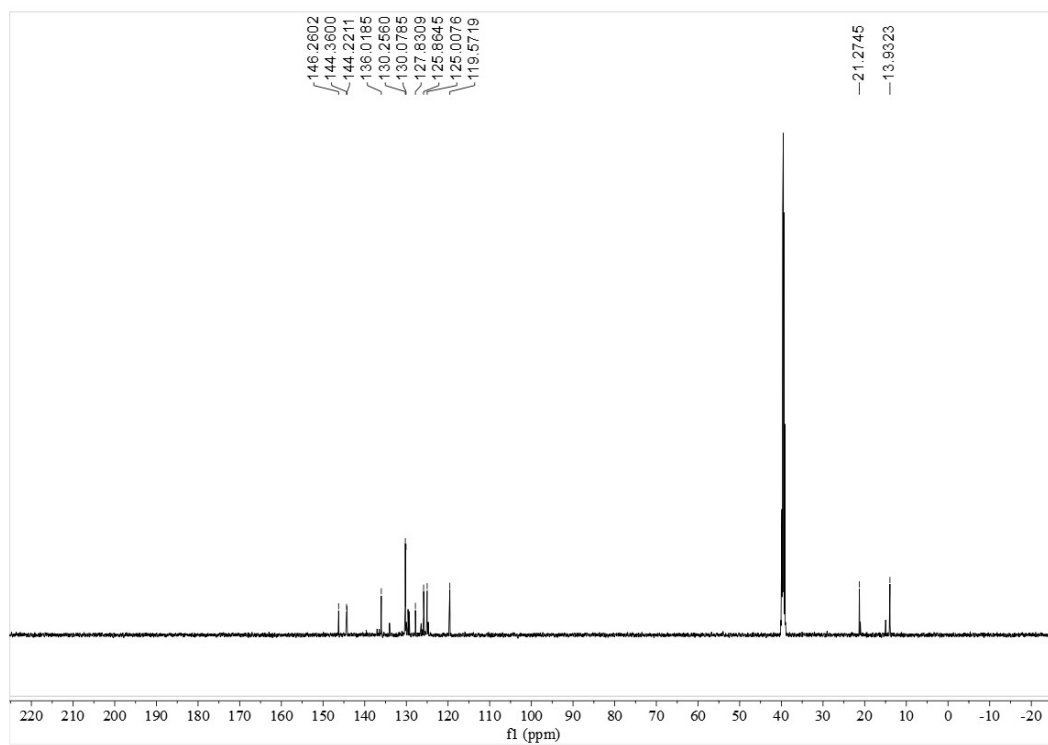



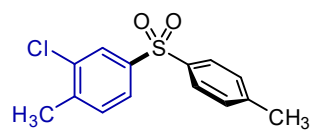

**30**, 86%

$^1\text{H}$  NMR (400 MHz,  $\text{CDCl}_3$ )

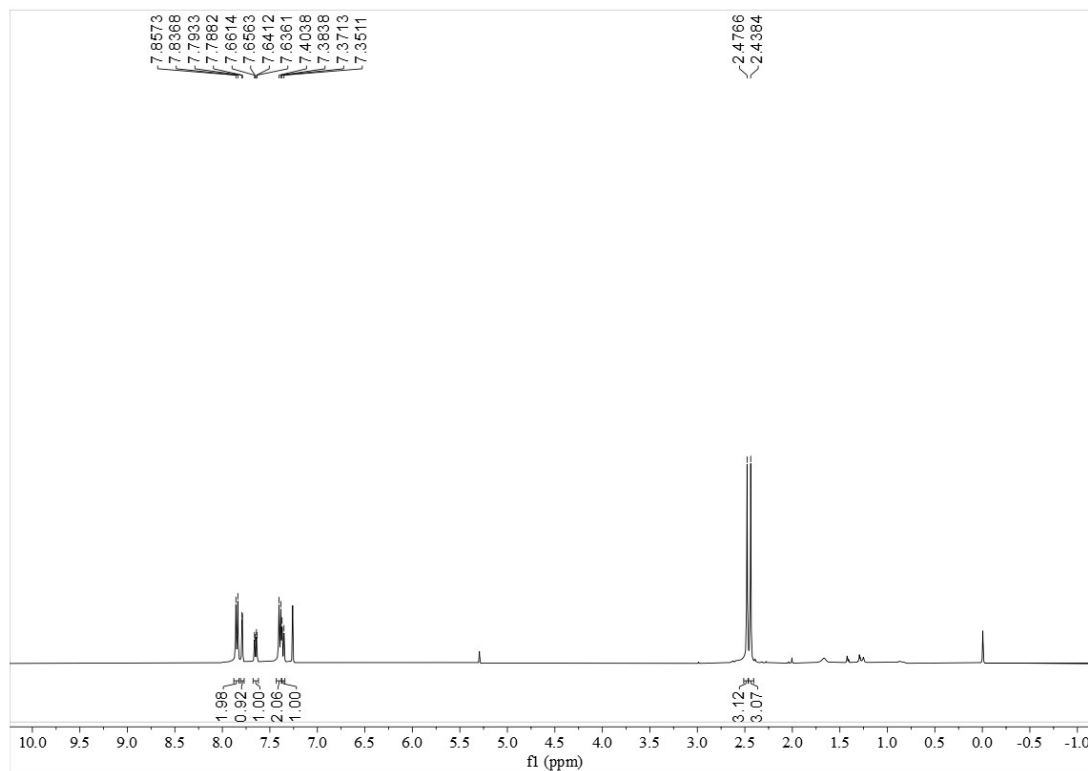

$^{13}\text{C}$  NMR (100 MHz,  $\text{CDCl}_3$ )

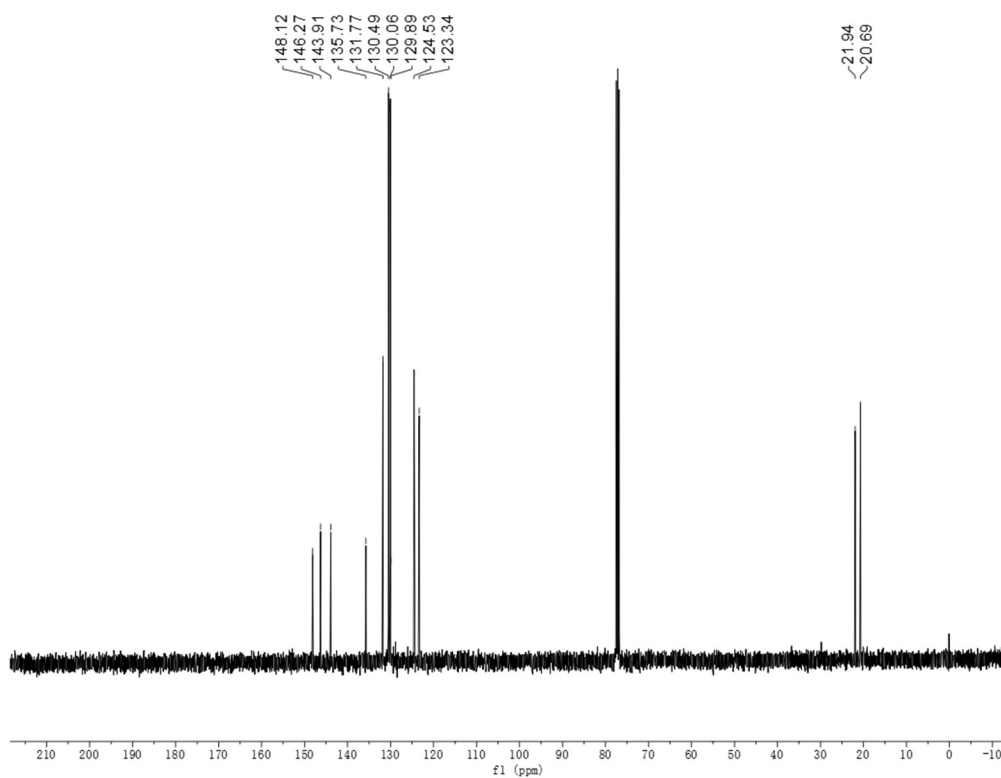

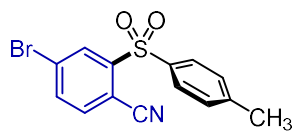

**3p**, 33%

$^1\text{H NMR}$  (500 MHz,  $\text{CDCl}_3$ )

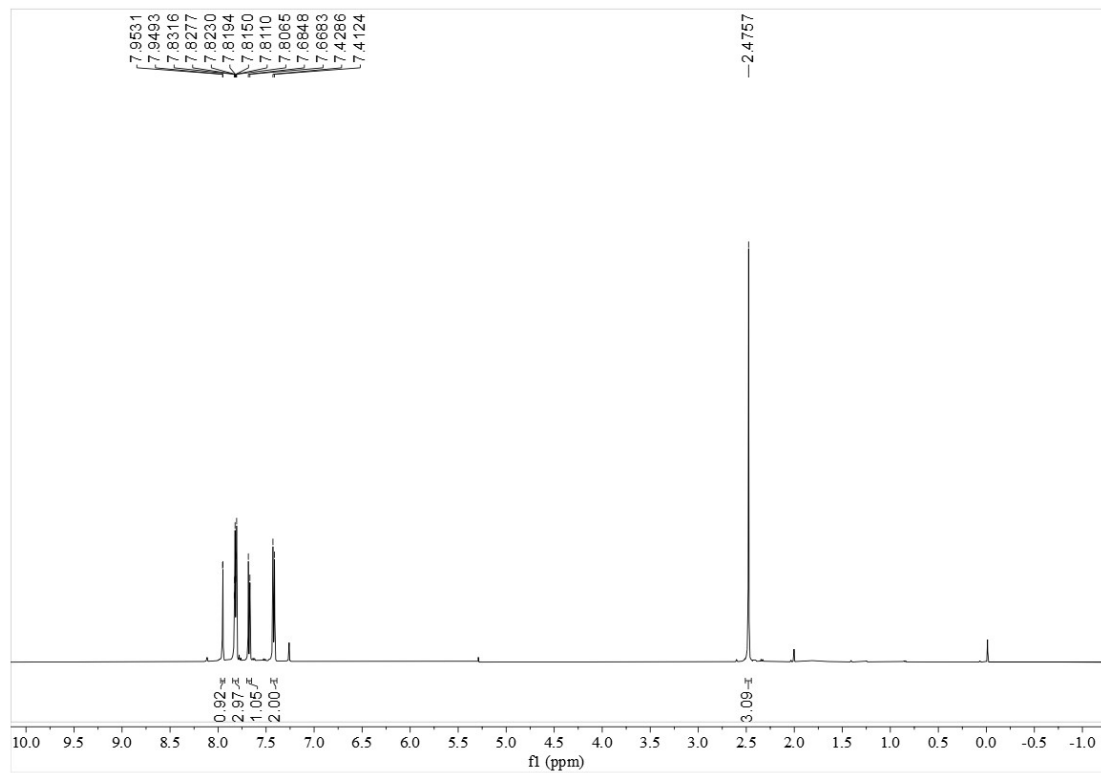

$^{13}\text{C NMR}$  (125 MHz,  $\text{CDCl}_3$ )

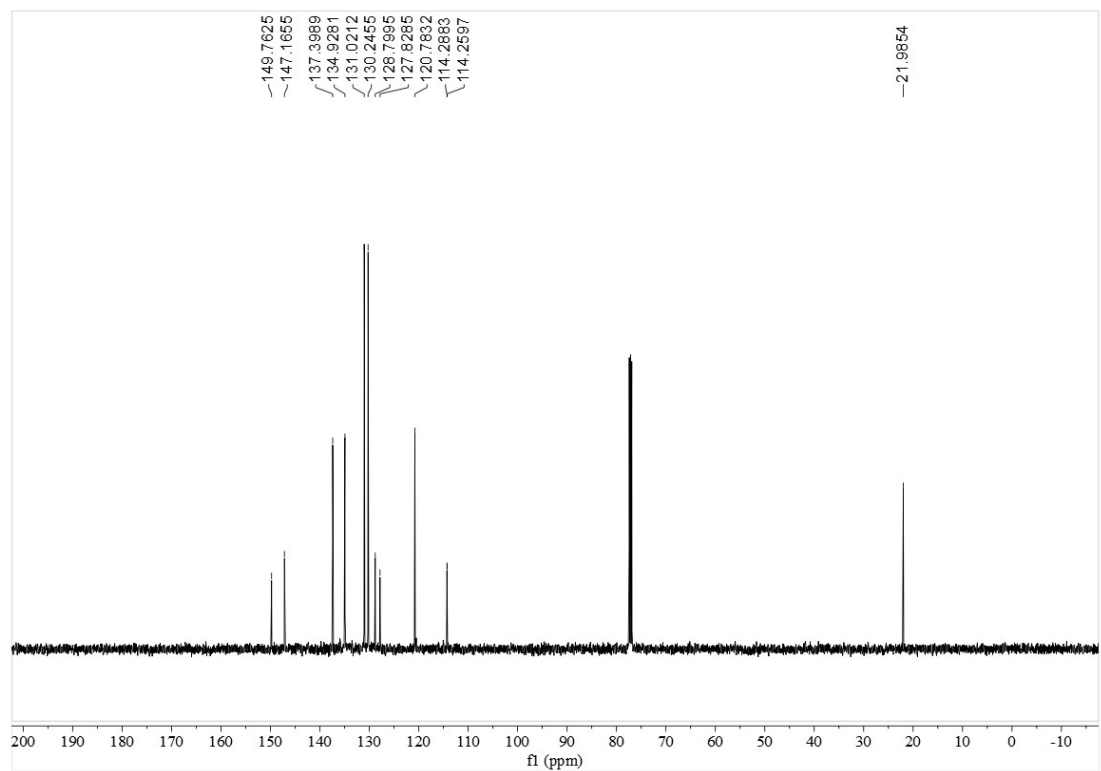

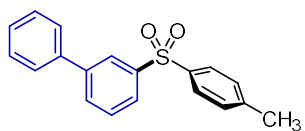

**3q**, 54%

$^1\text{H NMR}$  (500 MHz,  $\text{CDCl}_3$ )

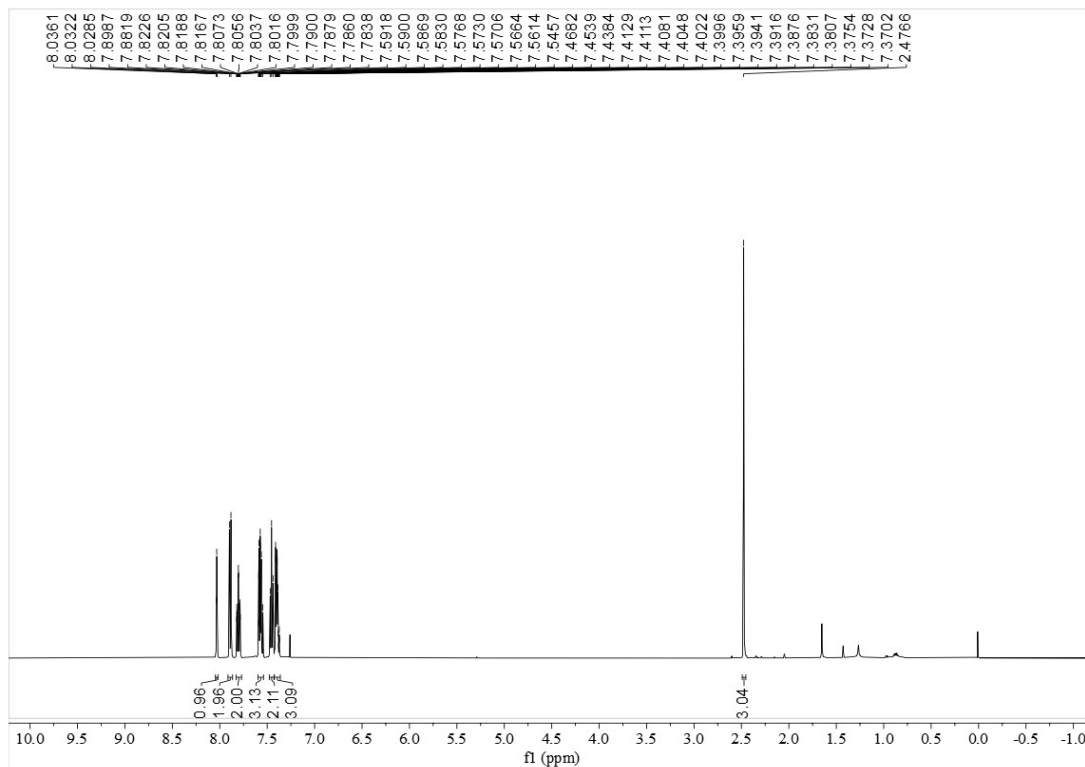

$^{13}\text{C NMR}$  (125 MHz,  $\text{CDCl}_3$ )

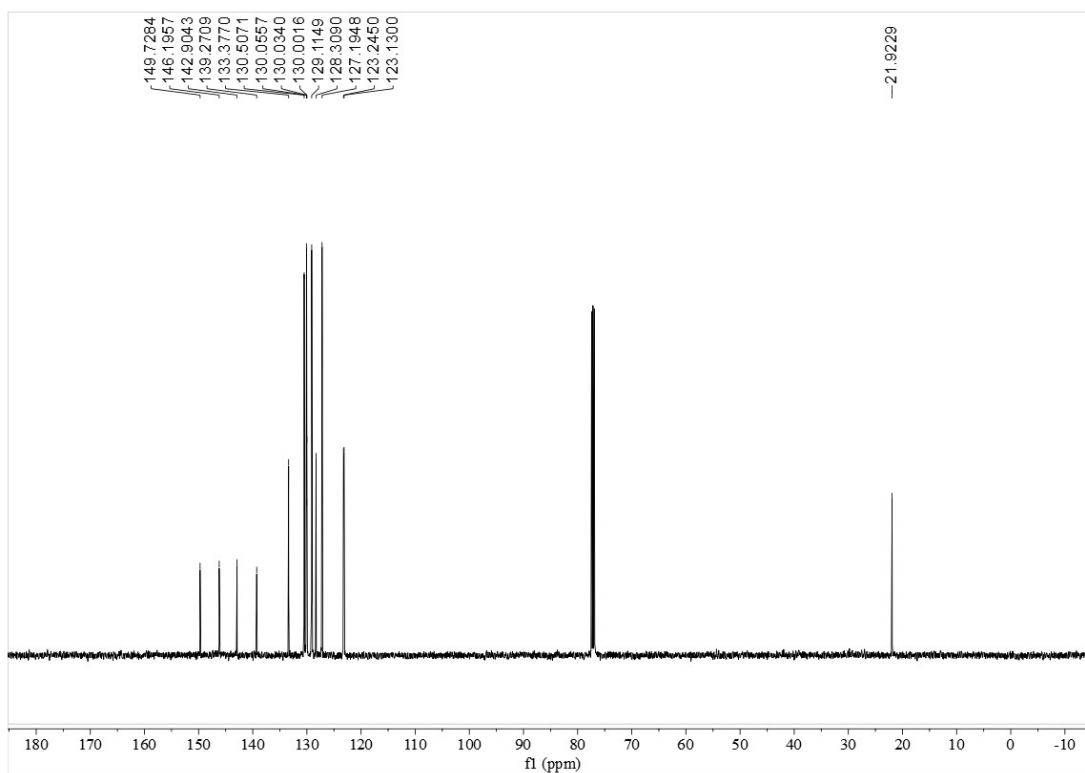

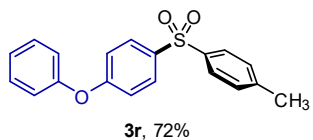

<sup>1</sup>H NMR (500 MHz, CDCl<sub>3</sub>)

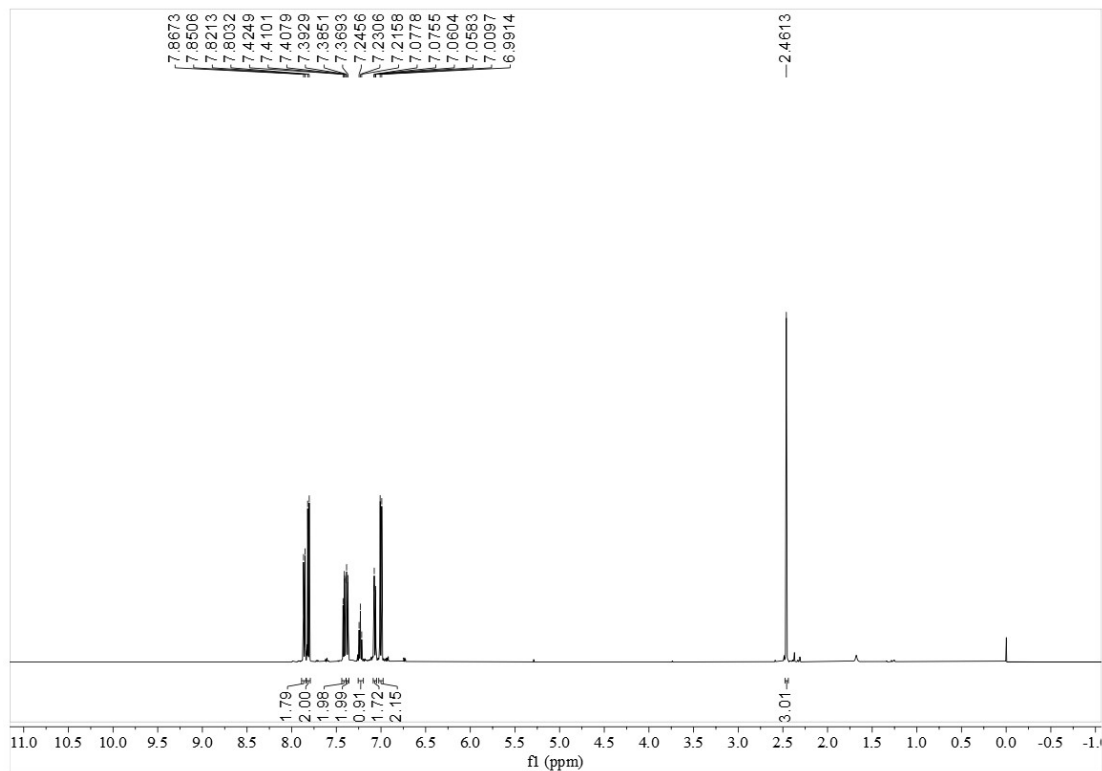

<sup>13</sup>C NMR (125 MHz, CDCl<sub>3</sub>)

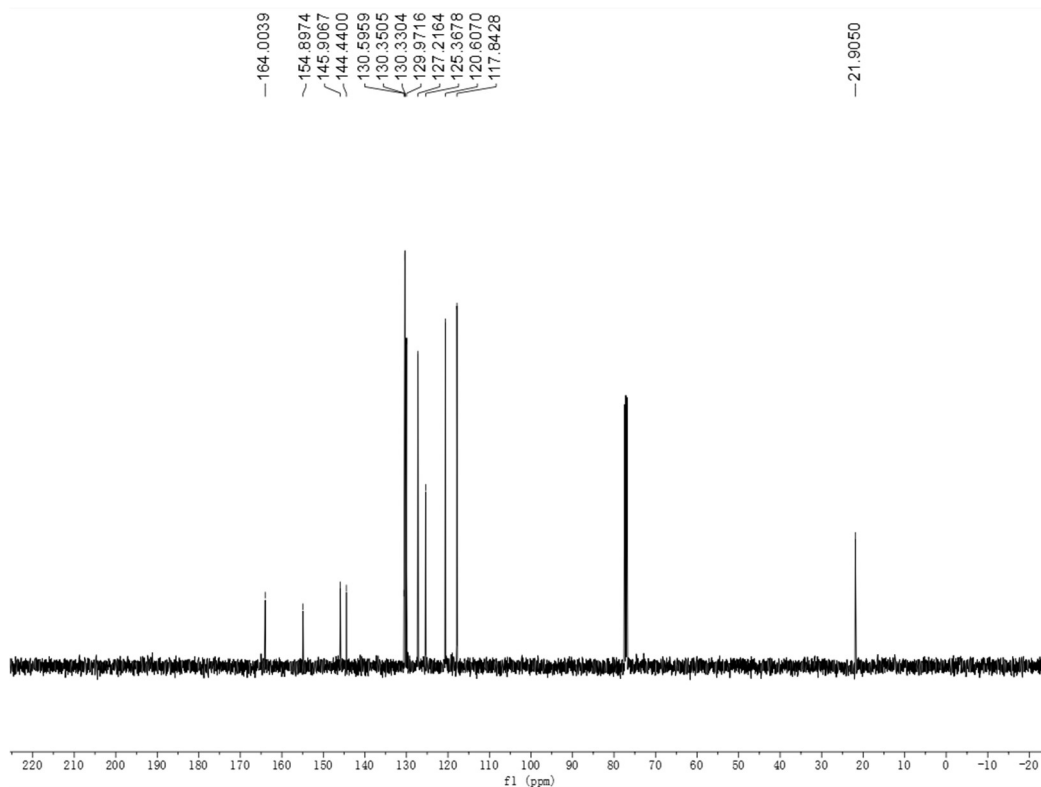

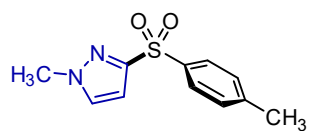

**3s**, 90%

$^1\text{H}$  NMR (500 MHz,  $\text{CDCl}_3$ )

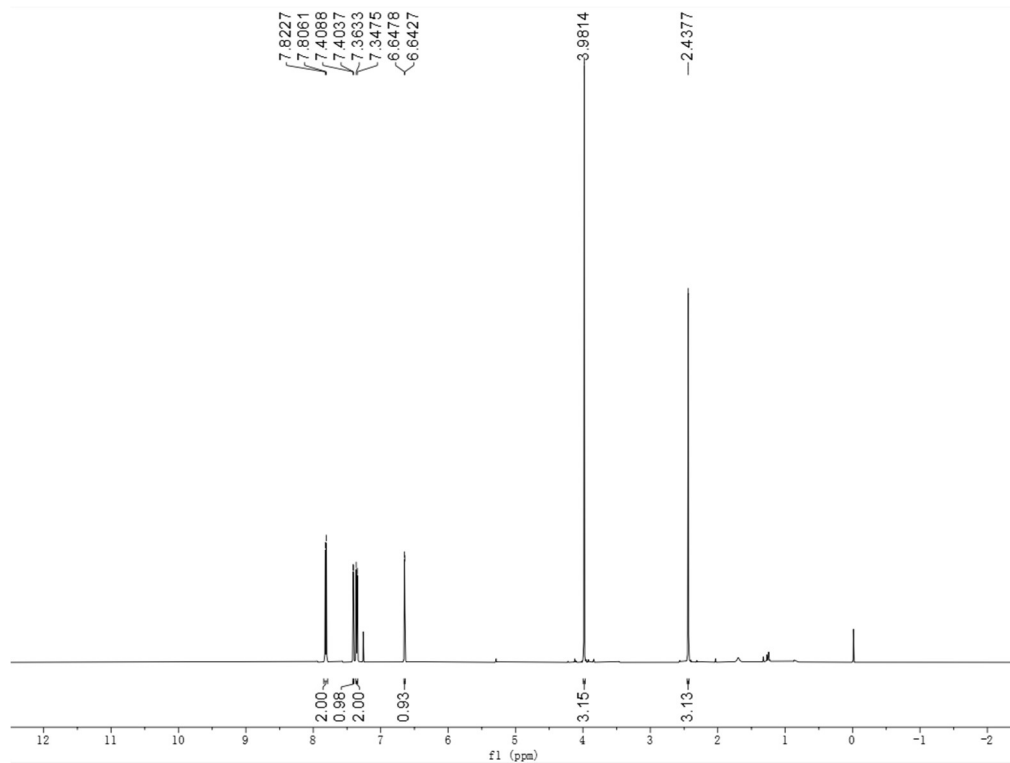

$^{13}\text{C}$  NMR (125 MHz,  $\text{CDCl}_3$ )

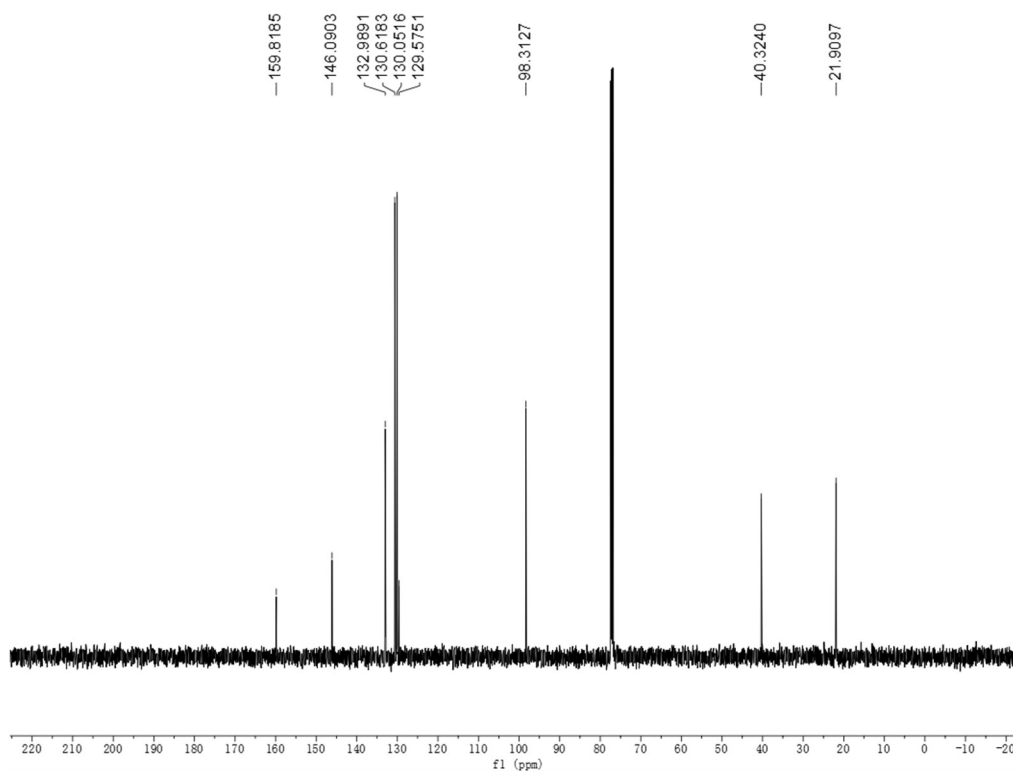

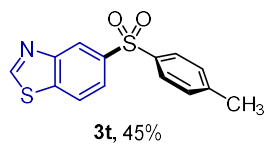

$^1\text{H}$  NMR (500 MHz,  $\text{CDCl}_3$ )

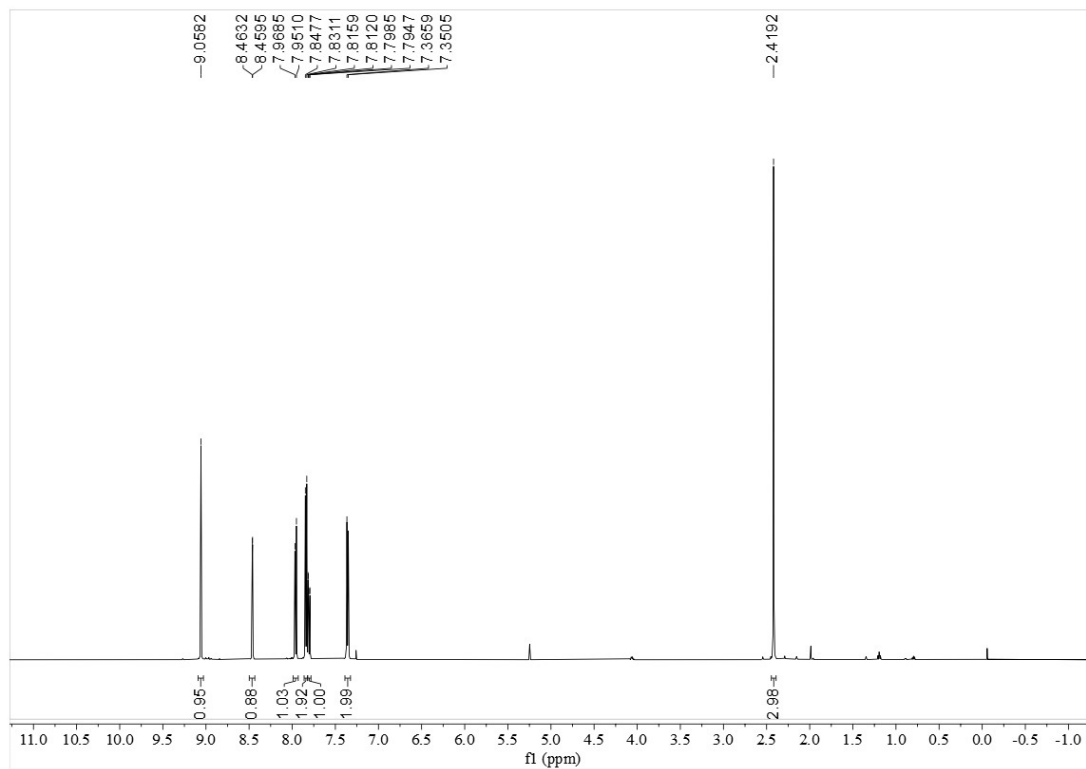

$^{13}\text{C}$  NMR (125 MHz,  $\text{CDCl}_3$ )

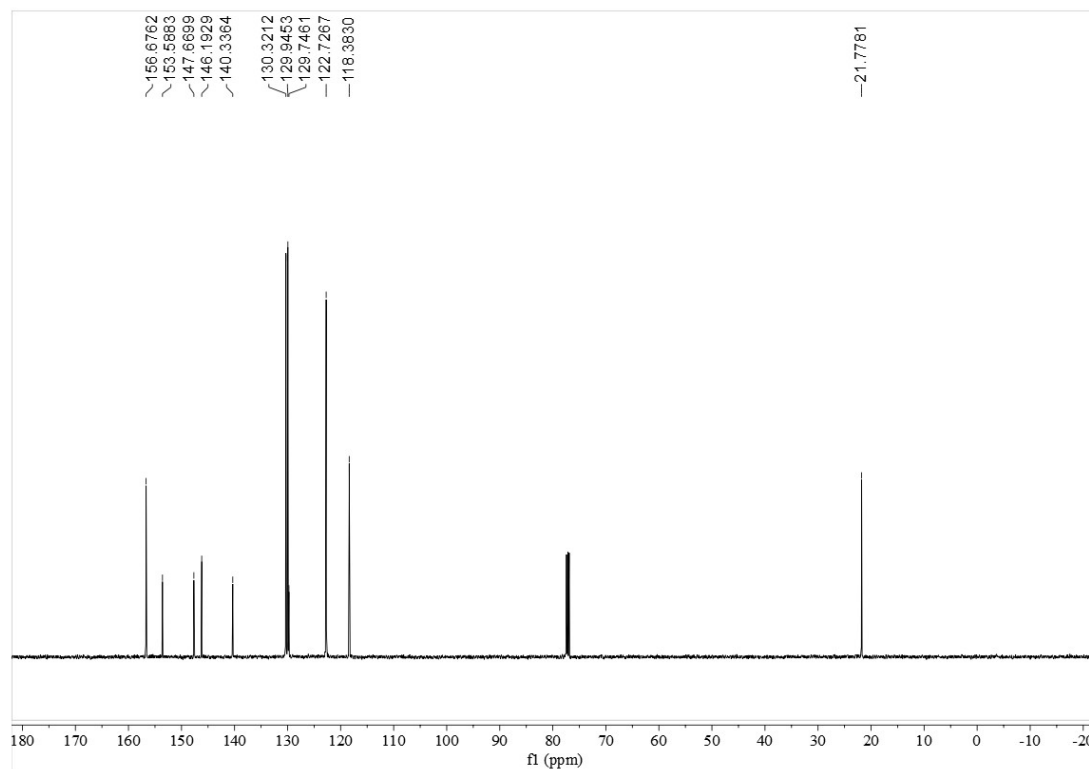

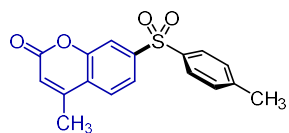

**3u**, 73%

$^1\text{H NMR}$  (500 MHz,  $\text{CD}_2\text{Cl}_2$ )

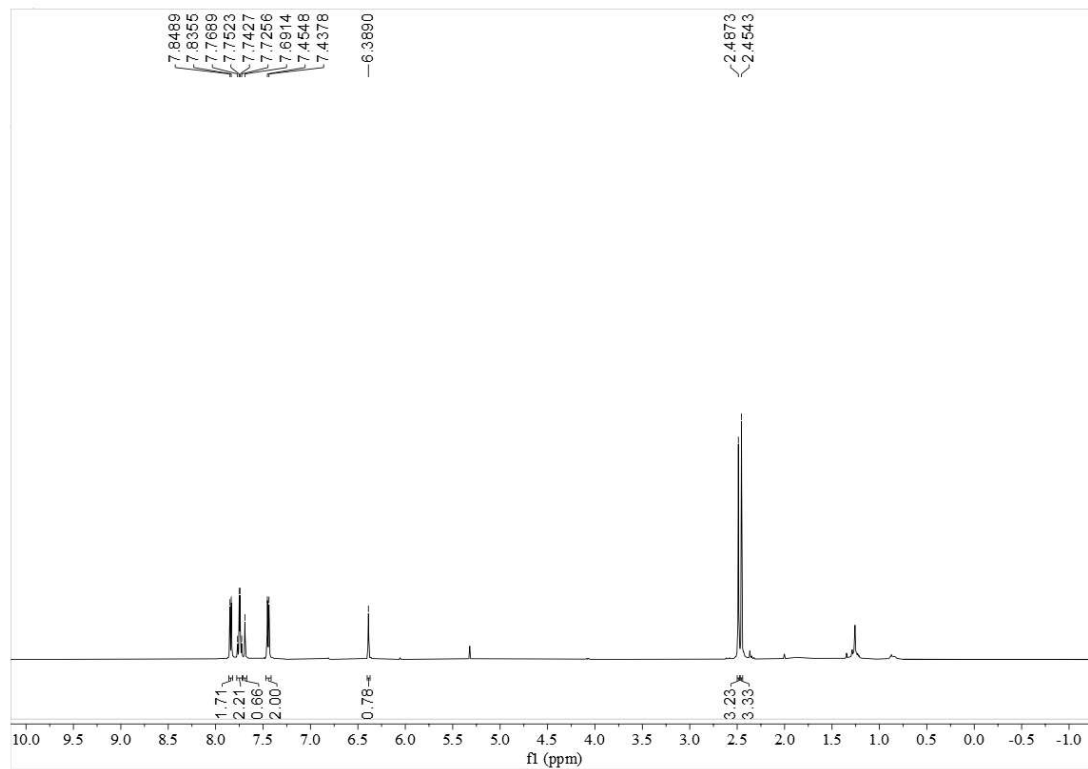

$^{13}\text{C NMR}$  (125 MHz,  $\text{CD}_2\text{Cl}_2$ )

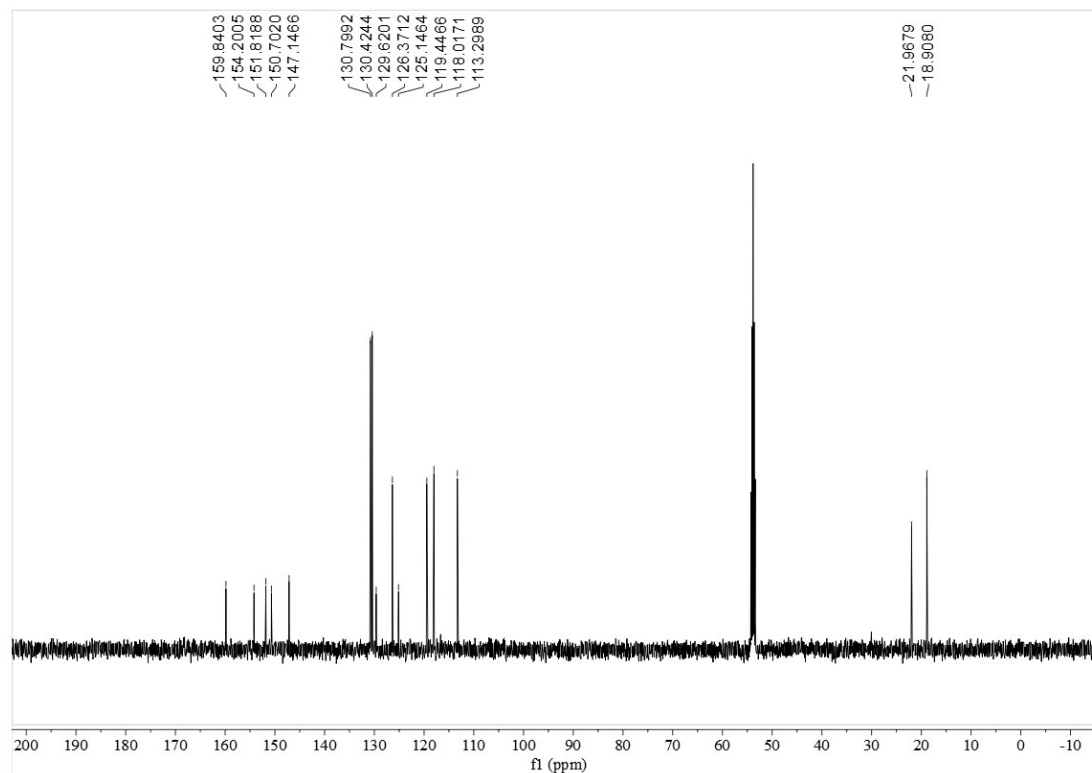

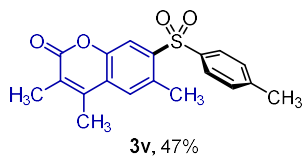

$^1\text{H NMR}$  (500 MHz,  $\text{CD}_2\text{Cl}_2$ )

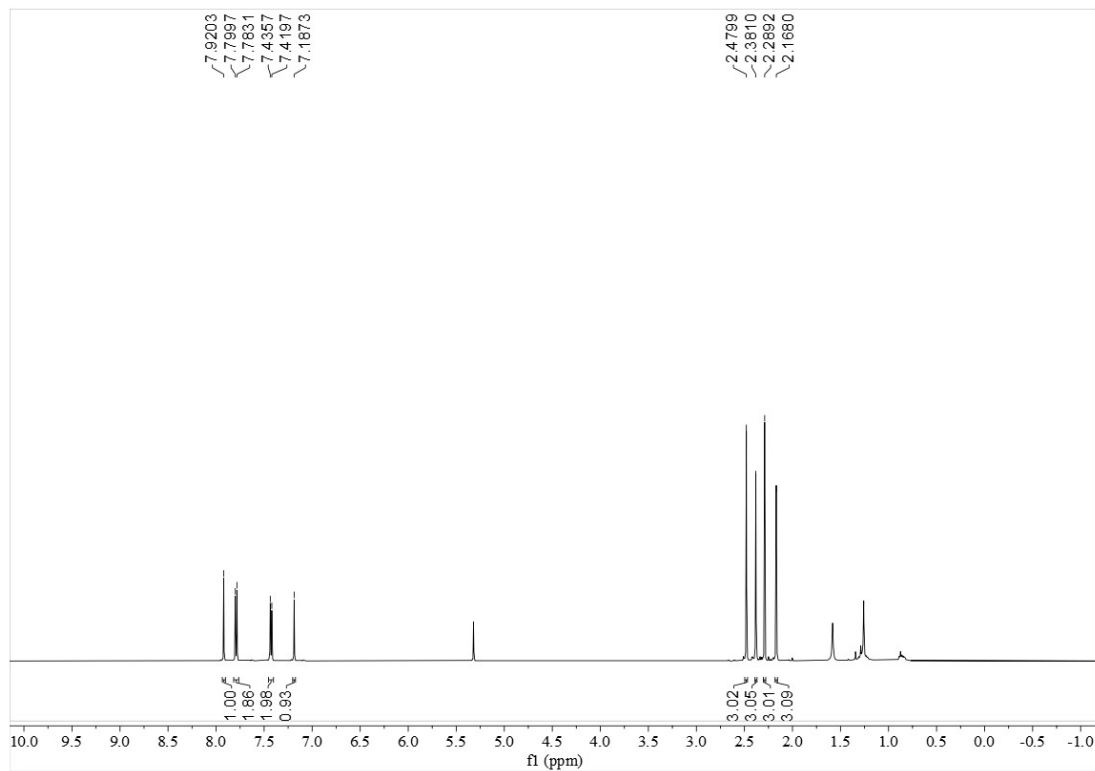

$^{13}\text{C NMR}$  (125 MHz,  $\text{CD}_2\text{Cl}_2$ )

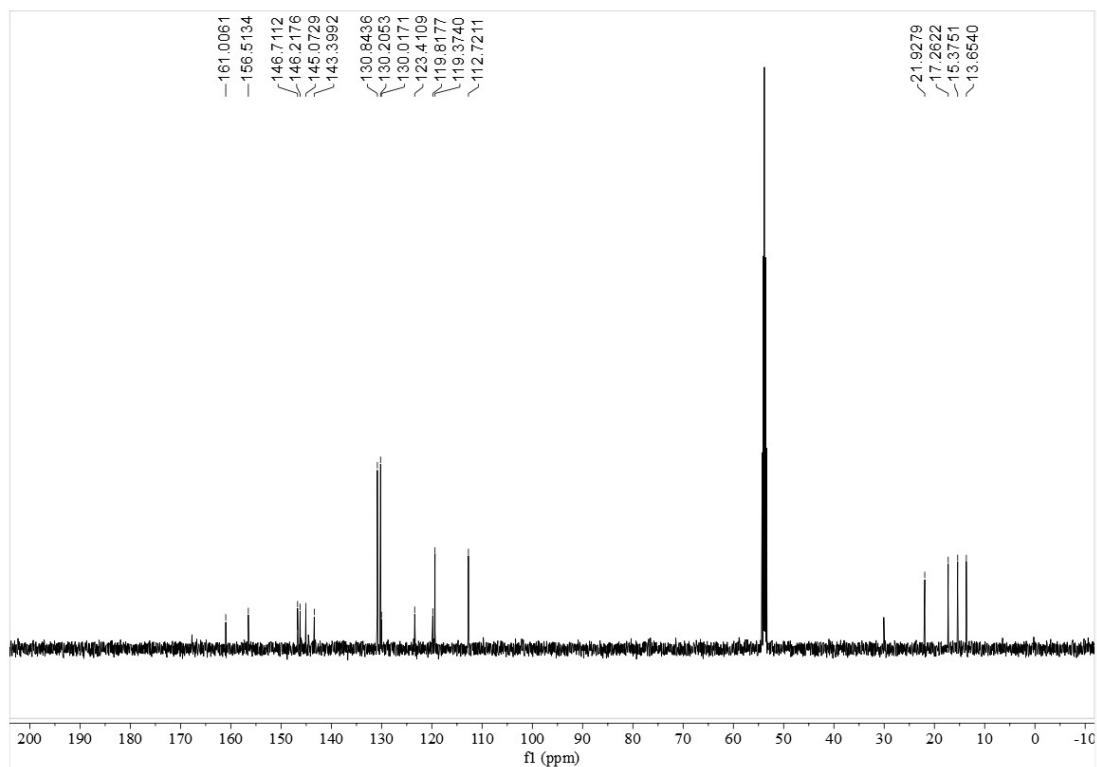



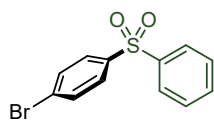

**4a**, 59%

$^1\text{H}$  NMR (400 MHz,  $\text{CDCl}_3$ )

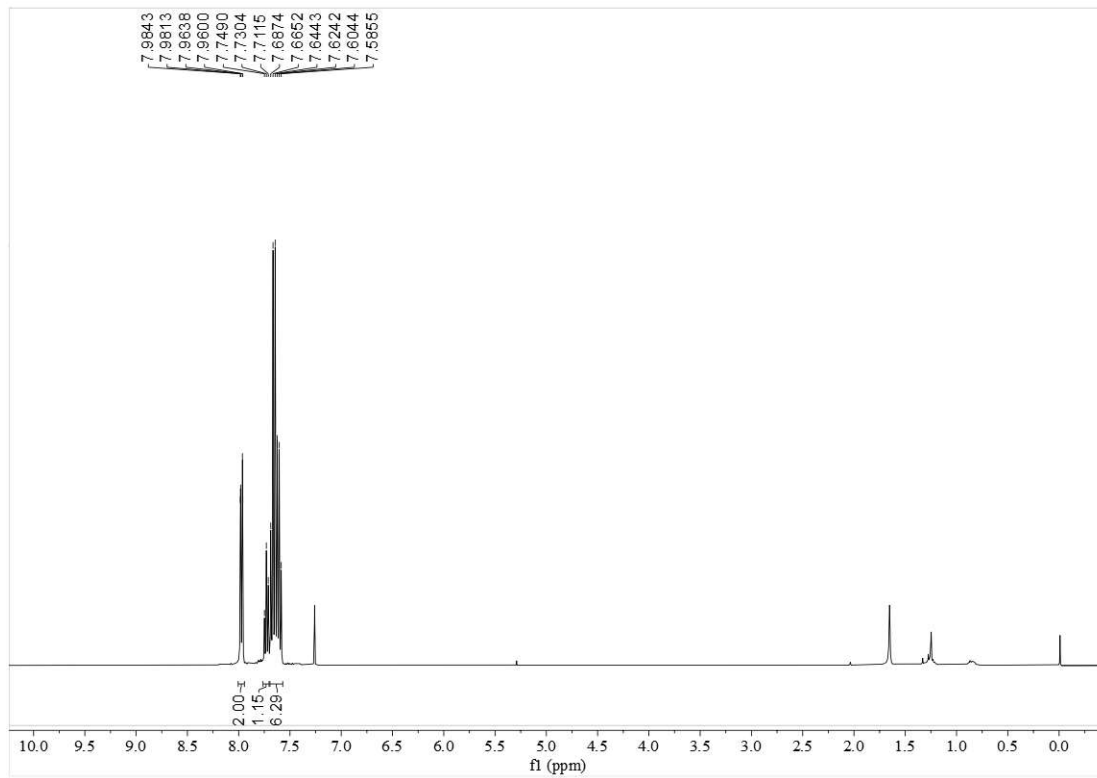

$^{13}\text{C}$  NMR (125 MHz,  $\text{CDCl}_3$ )

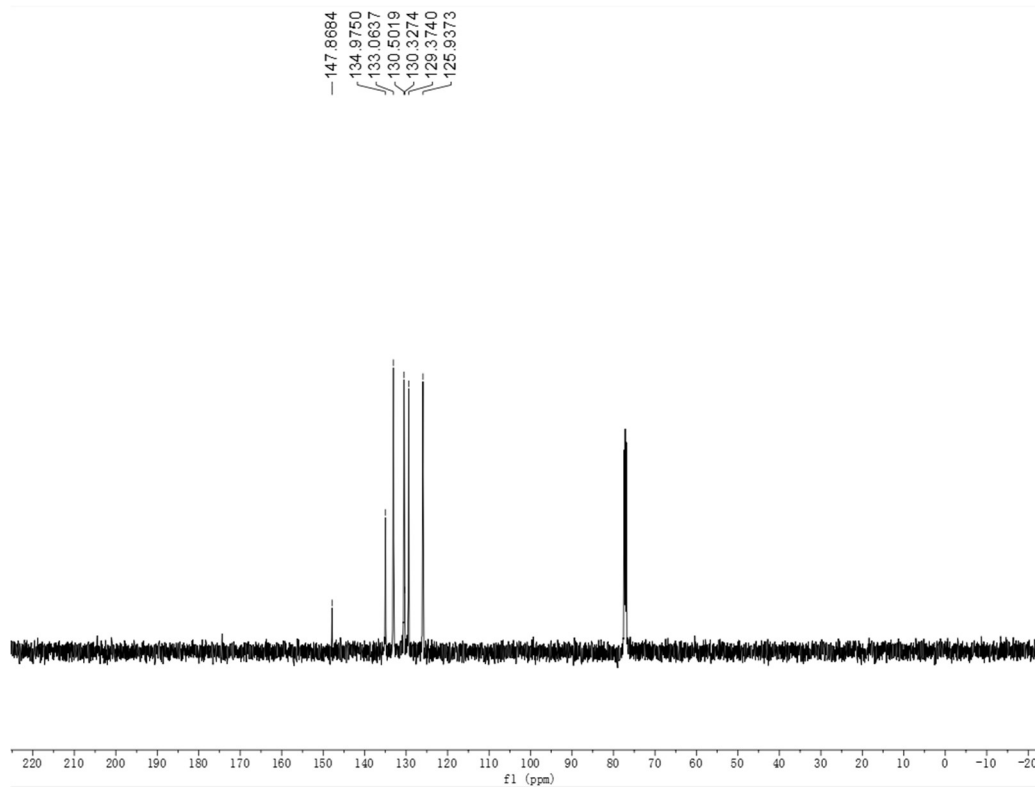

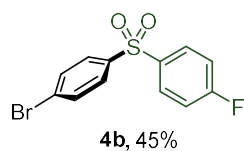

$^1\text{H}$  NMR (500 MHz, DMSO- $d_6$ )

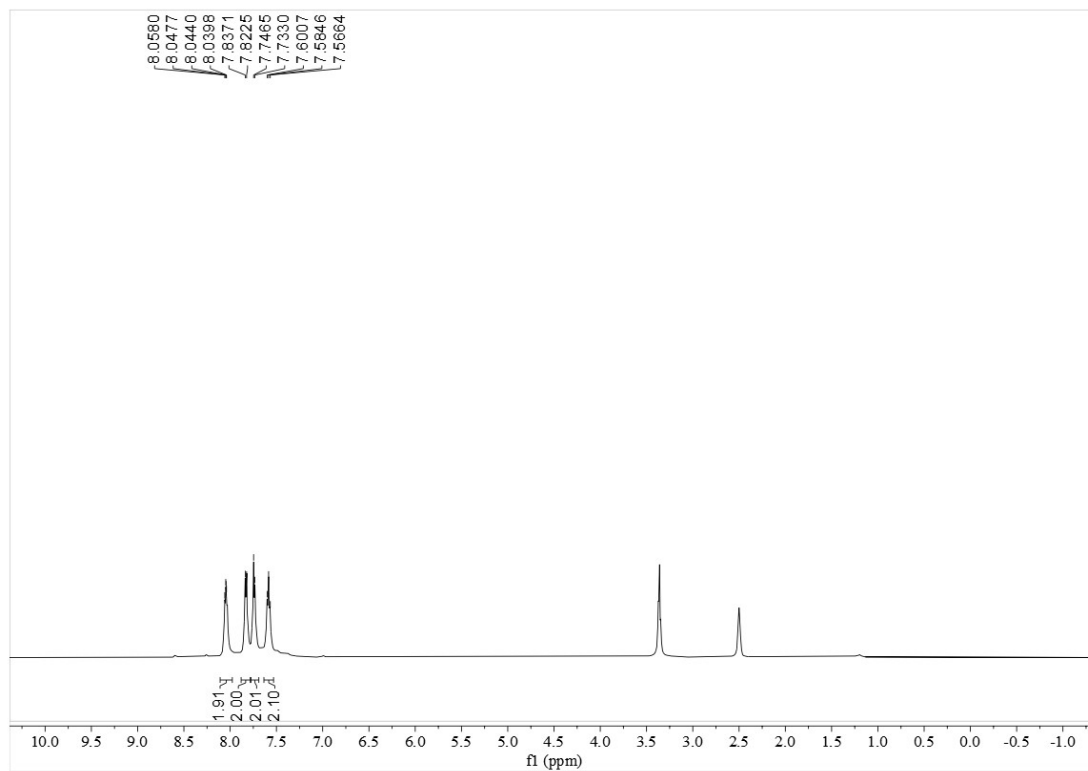

$^{13}\text{C}$  NMR (125 MHz, DMSO- $d_6$ )

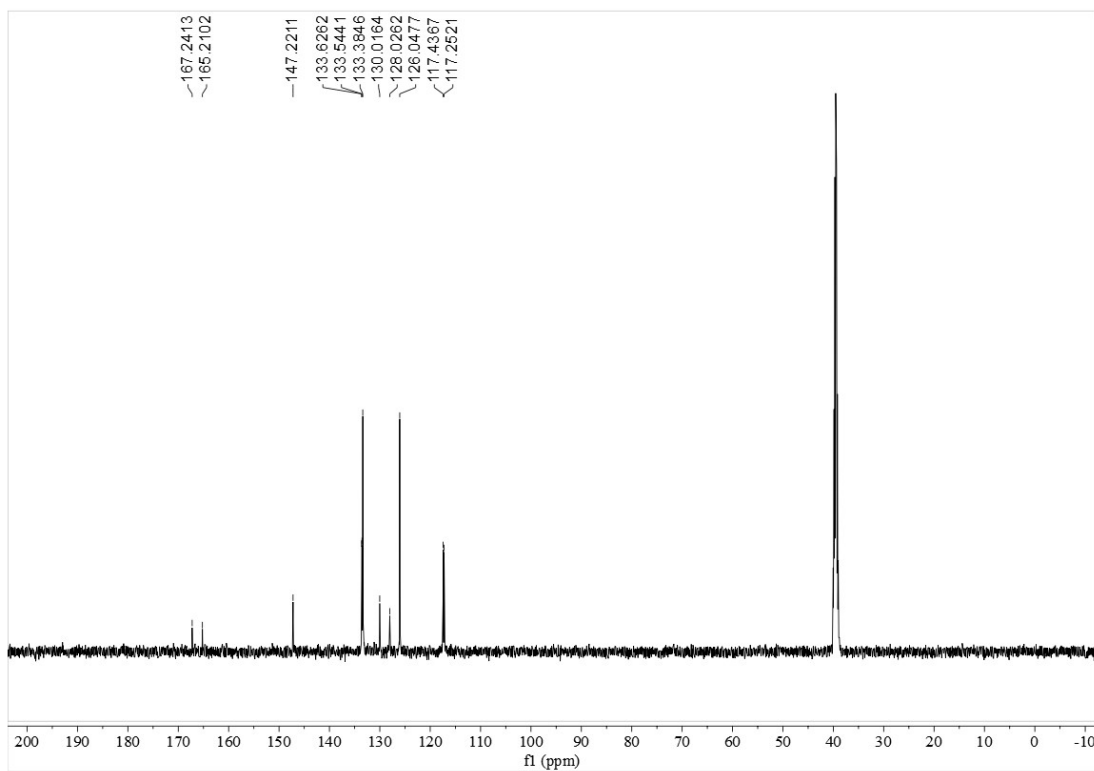

$^{19}\text{F}$  NMR (471 MHz,  $\text{DMSO-}d_6$ )

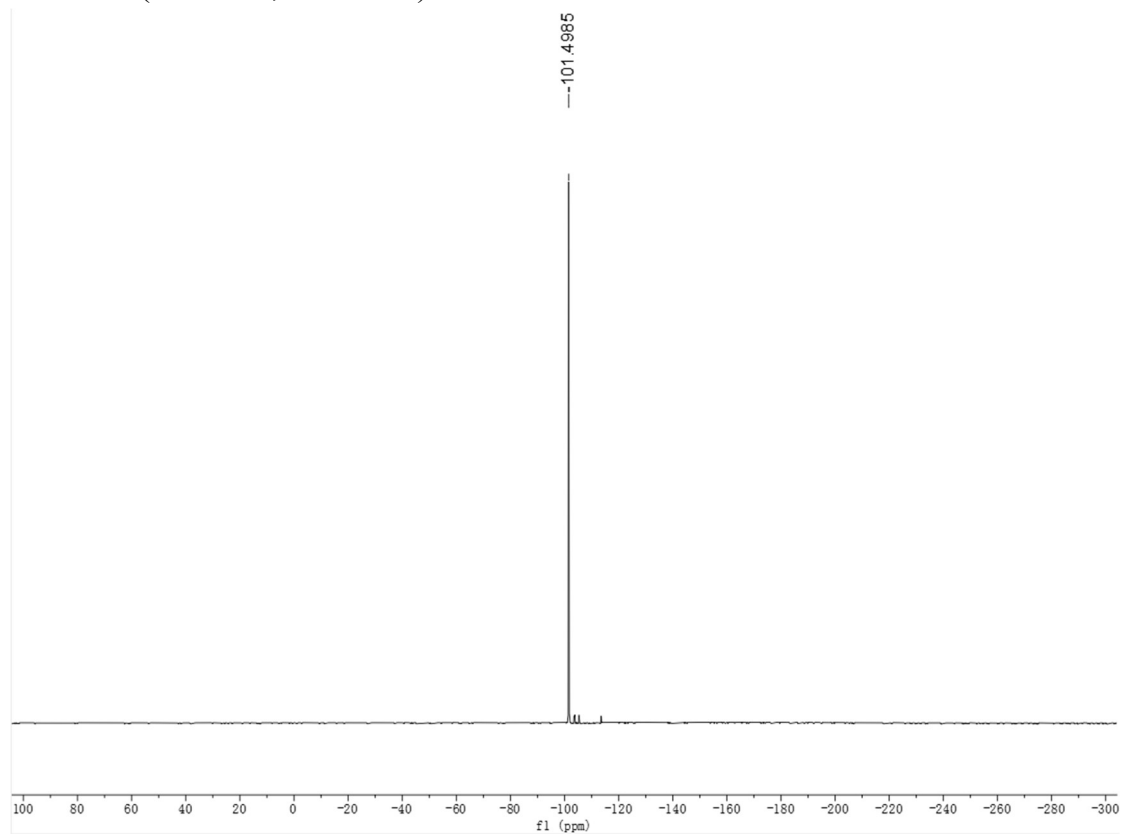

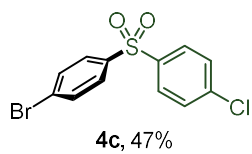

$^1\text{H}$  NMR (400 MHz, DMSO- $d_6$ )

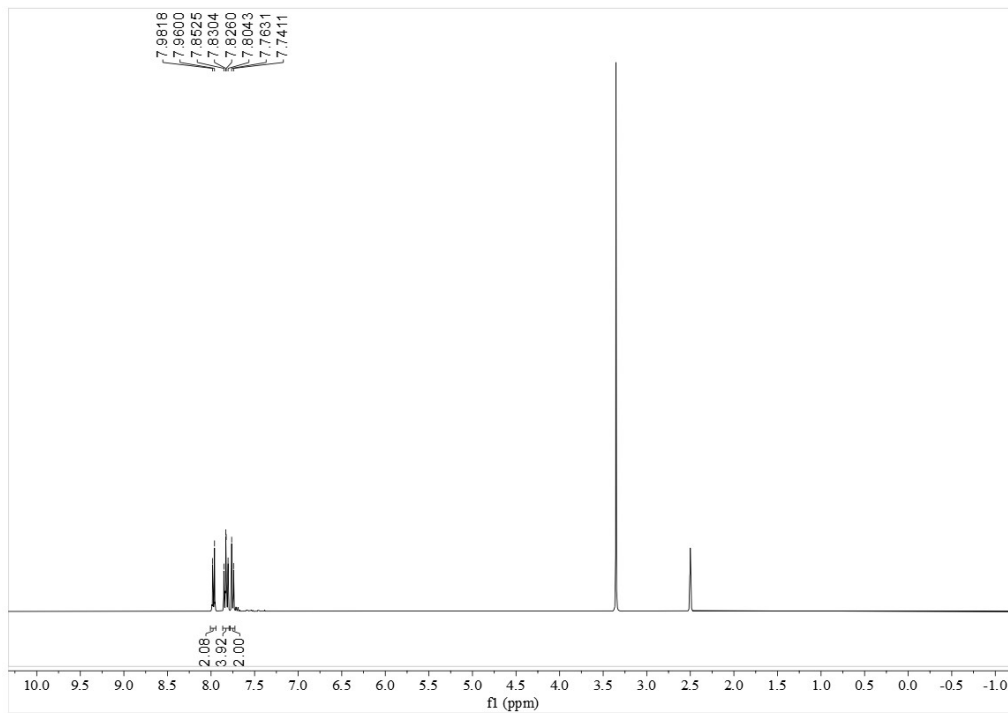

$^{13}\text{C}$  NMR (100 MHz, DMSO- $d_6$ )

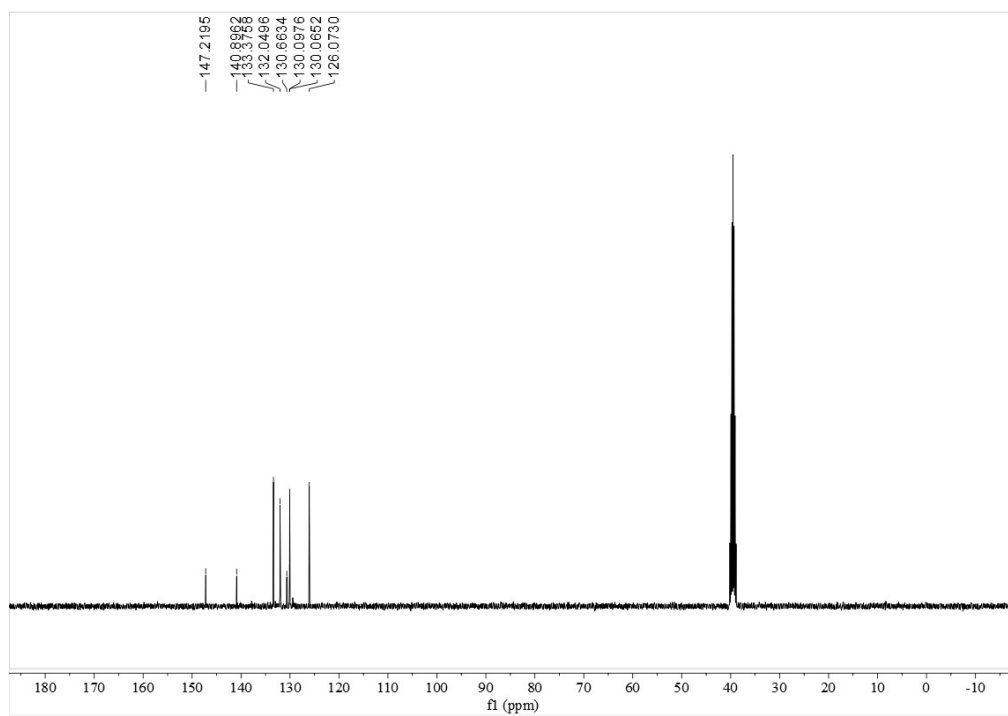

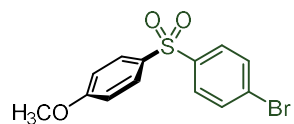

4d, 35%

$^1\text{H}$  NMR (400 MHz,  $\text{CDCl}_3$ )

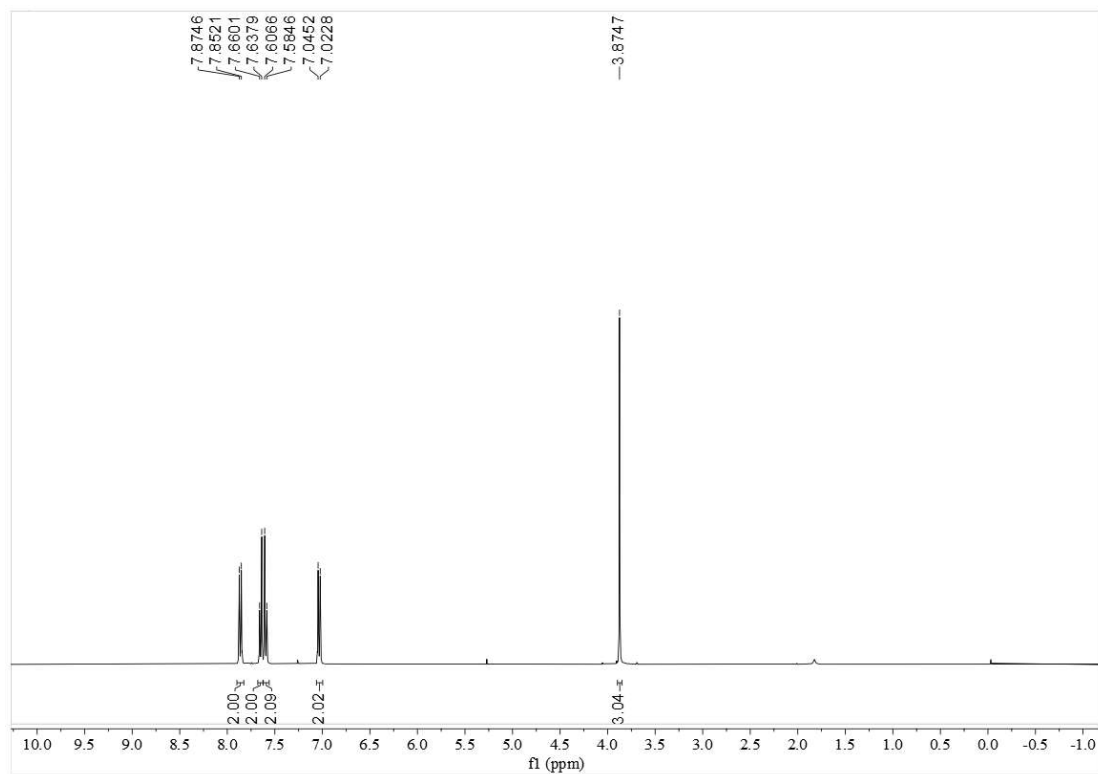

$^{13}\text{C}$  NMR (100 MHz,  $\text{CDCl}_3$ )

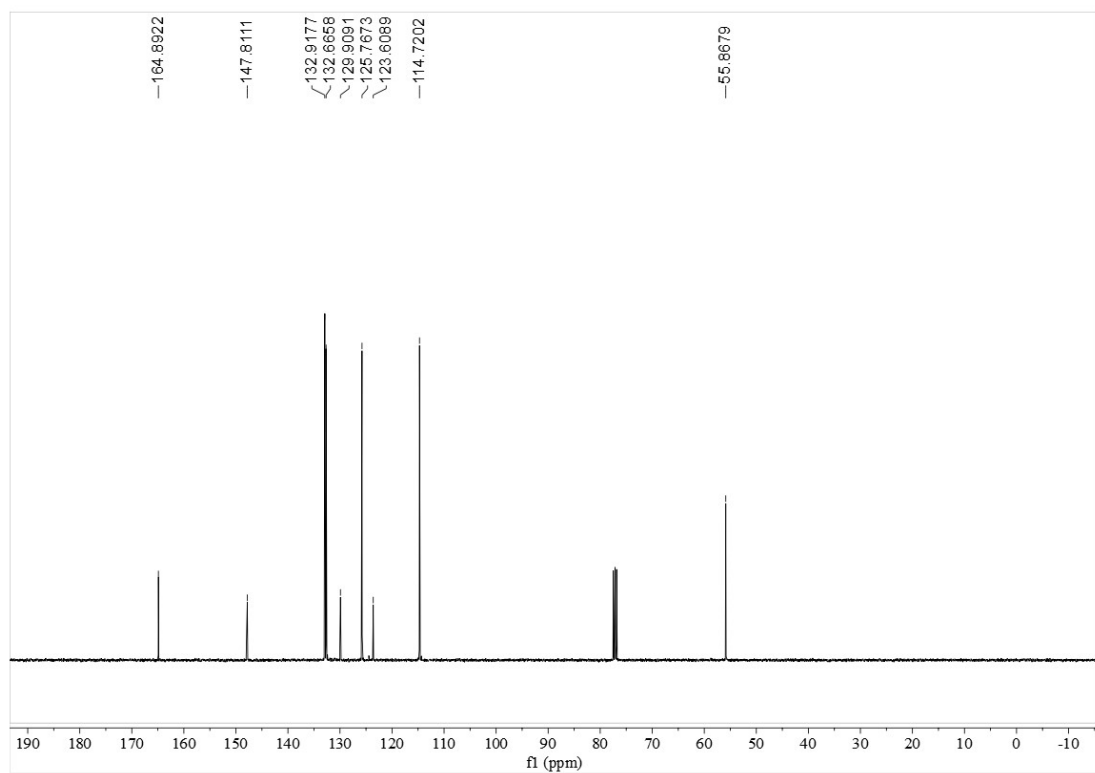

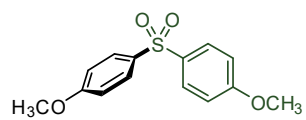

**4e**, 75%

$^1\text{H}$  NMR (400 MHz,  $\text{CDCl}_3$ )

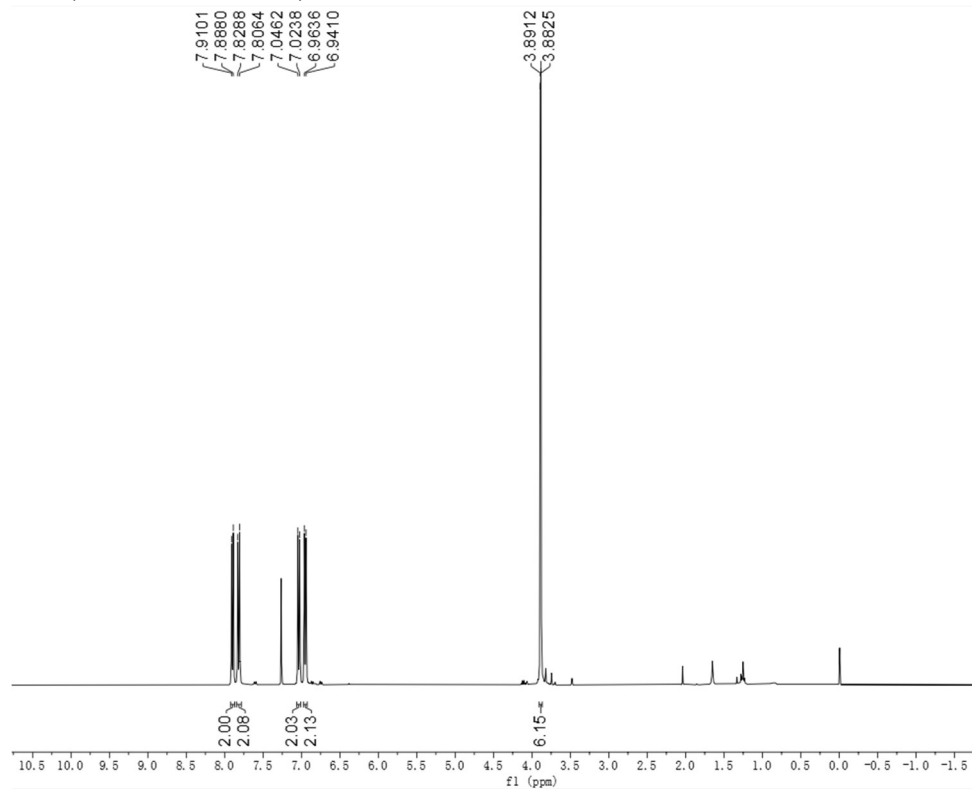

$^{13}\text{C}$  NMR (100 MHz,  $\text{CDCl}_3$ )

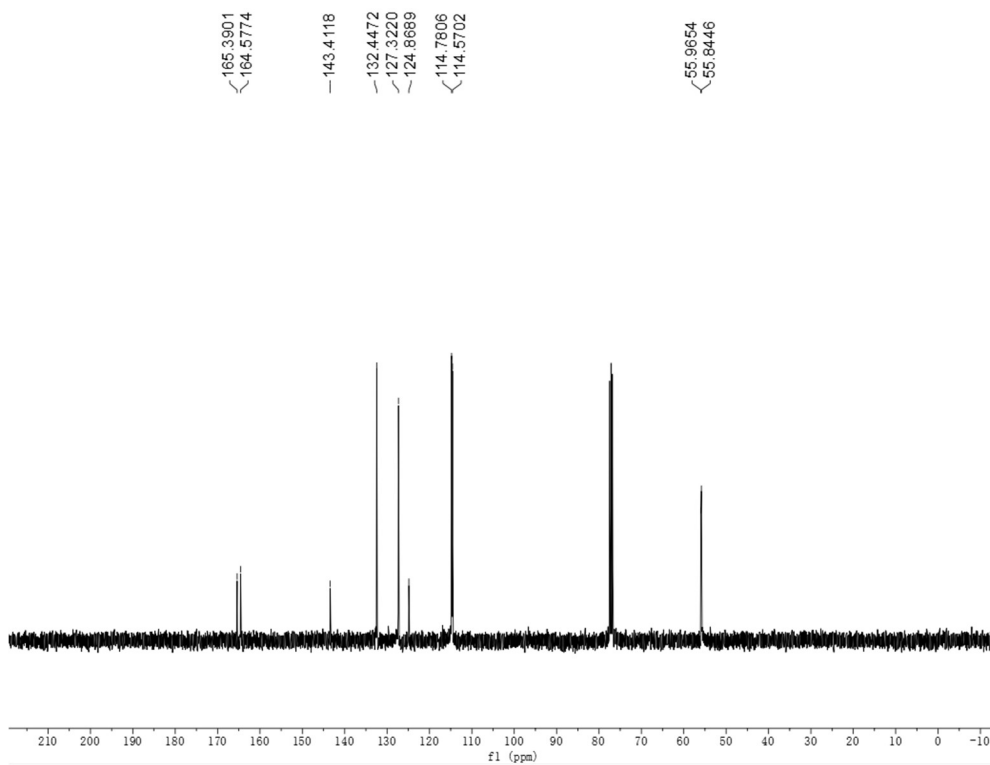

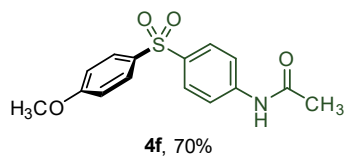

<sup>1</sup>H NMR (400 MHz, CDCl<sub>3</sub>)

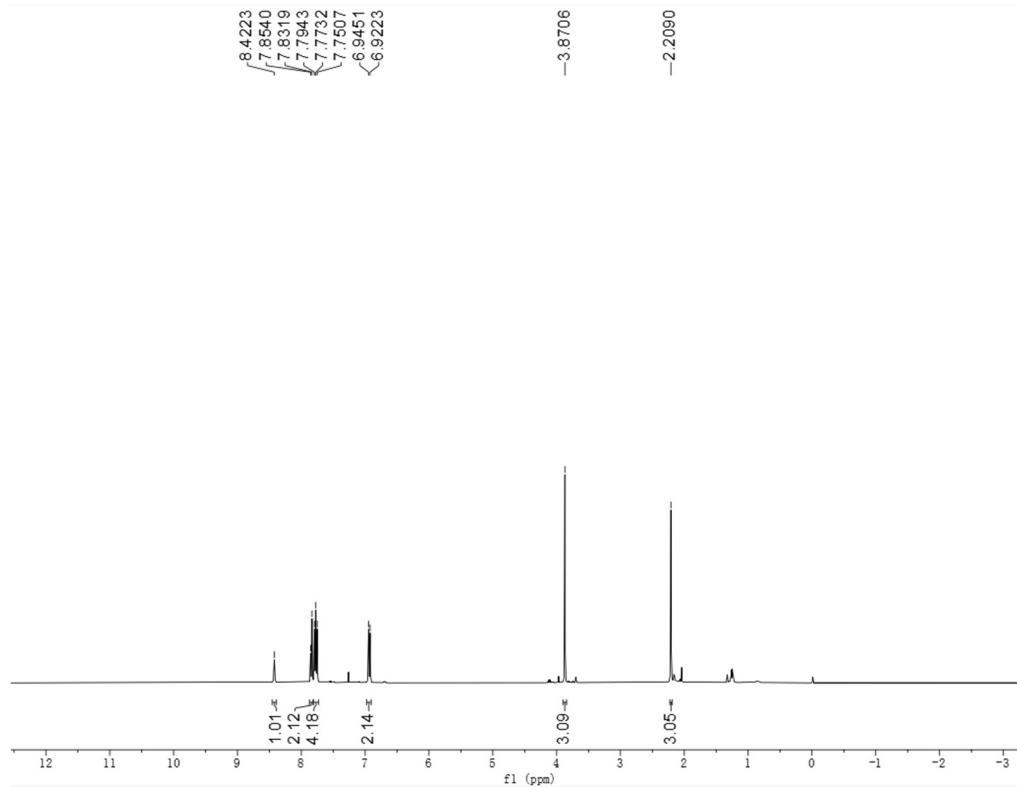

<sup>13</sup>C NMR (125 MHz, CDCl<sub>3</sub>)

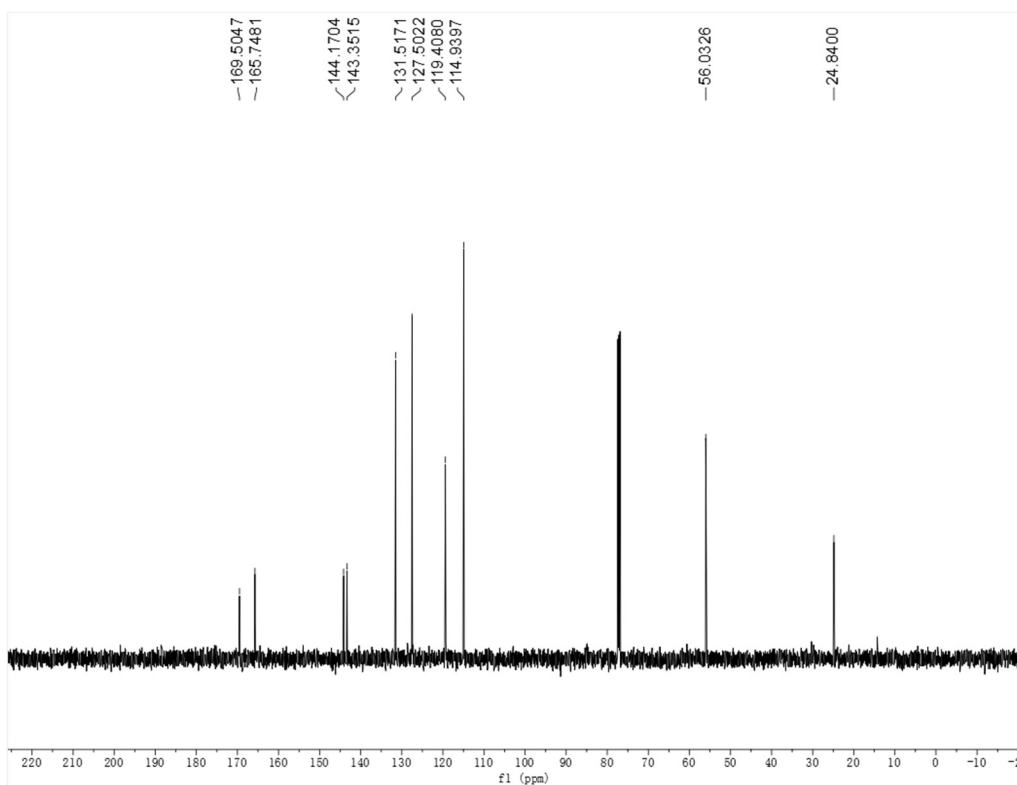

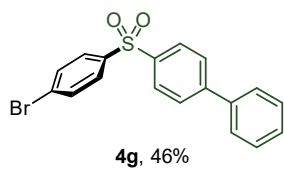

$^1\text{H NMR}$  (400 MHz,  $\text{CDCl}_3$ )

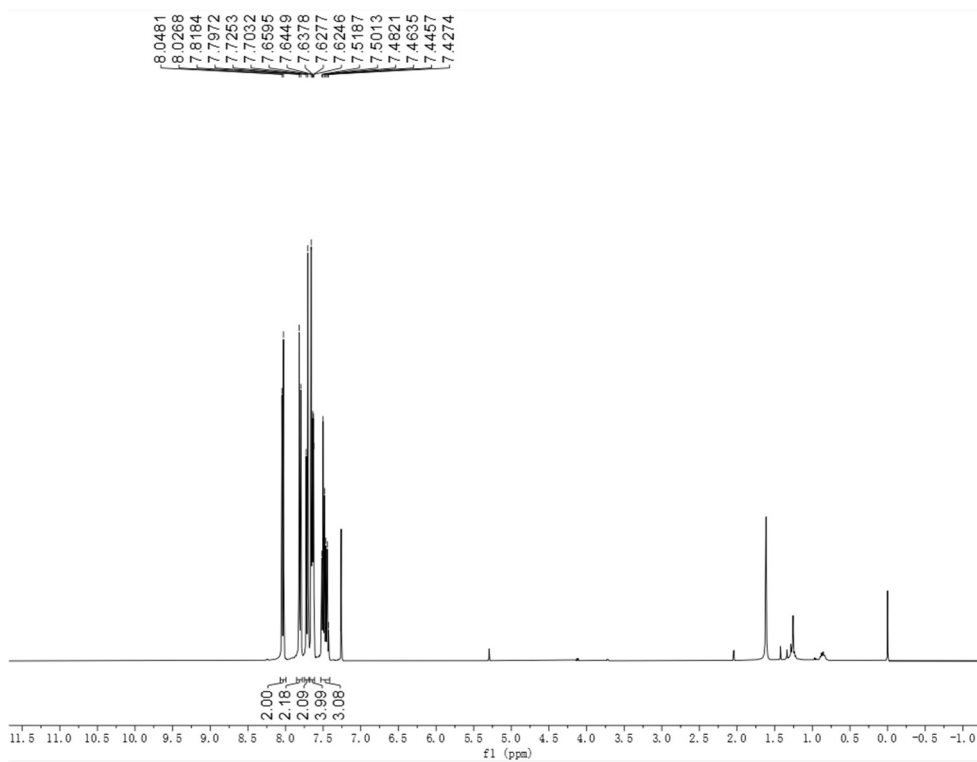

$^{13}\text{C NMR}$  (125 MHz,  $\text{CDCl}_3$ )

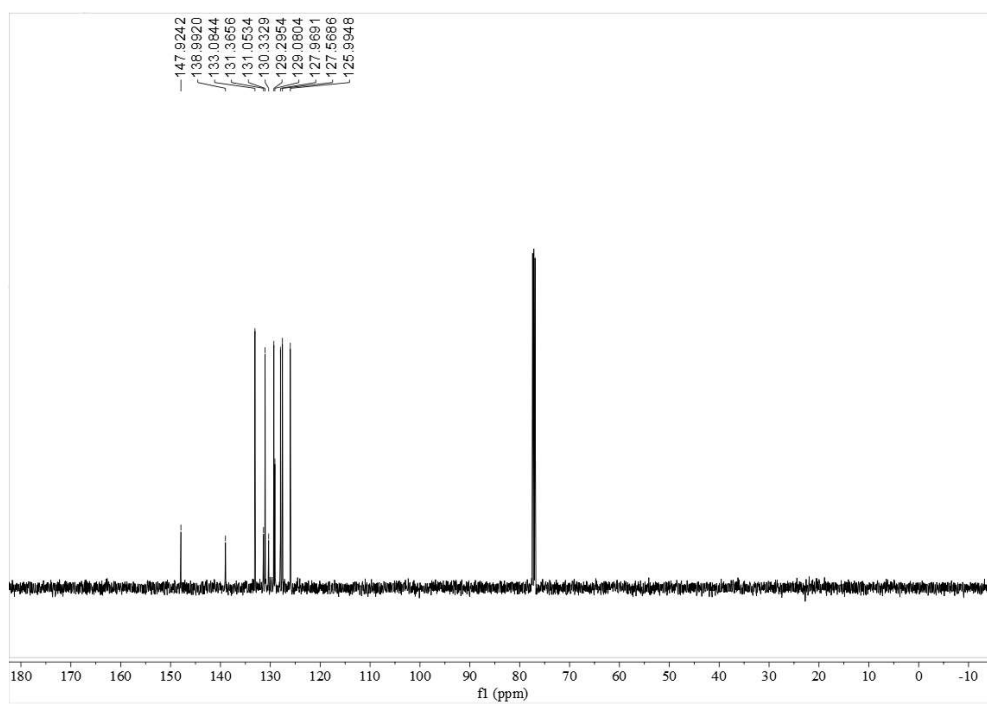



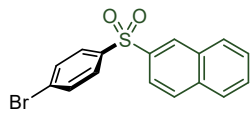

4h, 43%

$^1\text{H}$  NMR (400 MHz,  $\text{CDCl}_3$ )

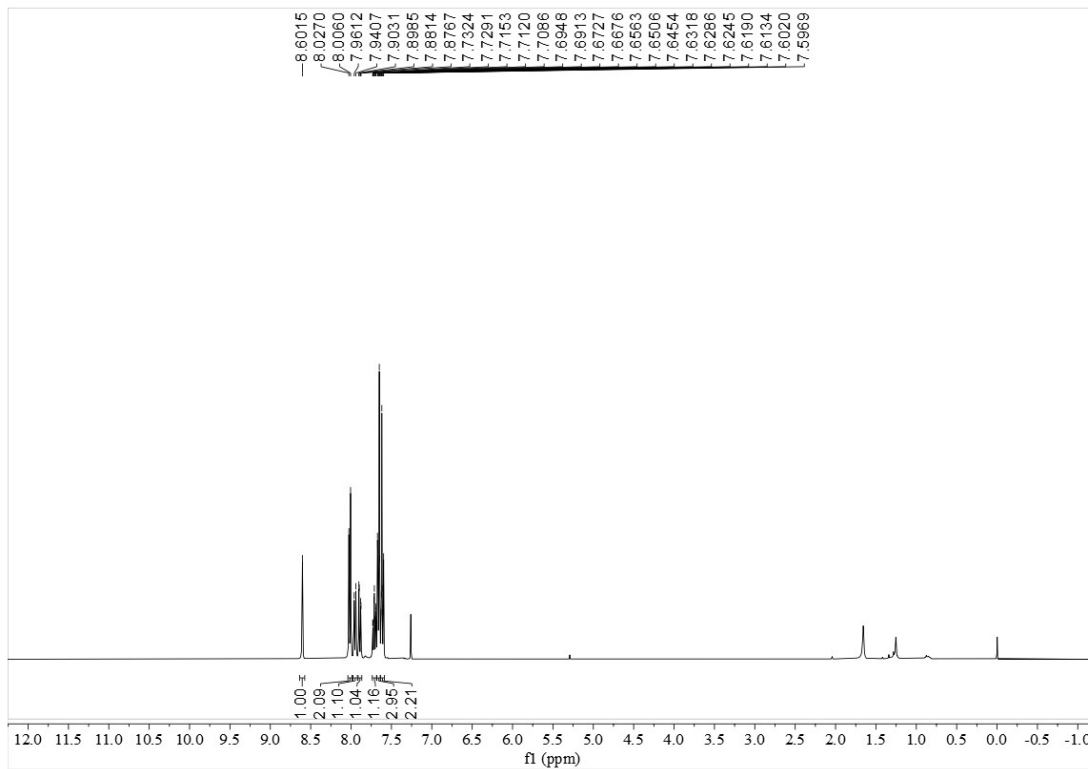

$^{13}\text{C}$  NMR (125 MHz,  $\text{CDCl}_3$ )

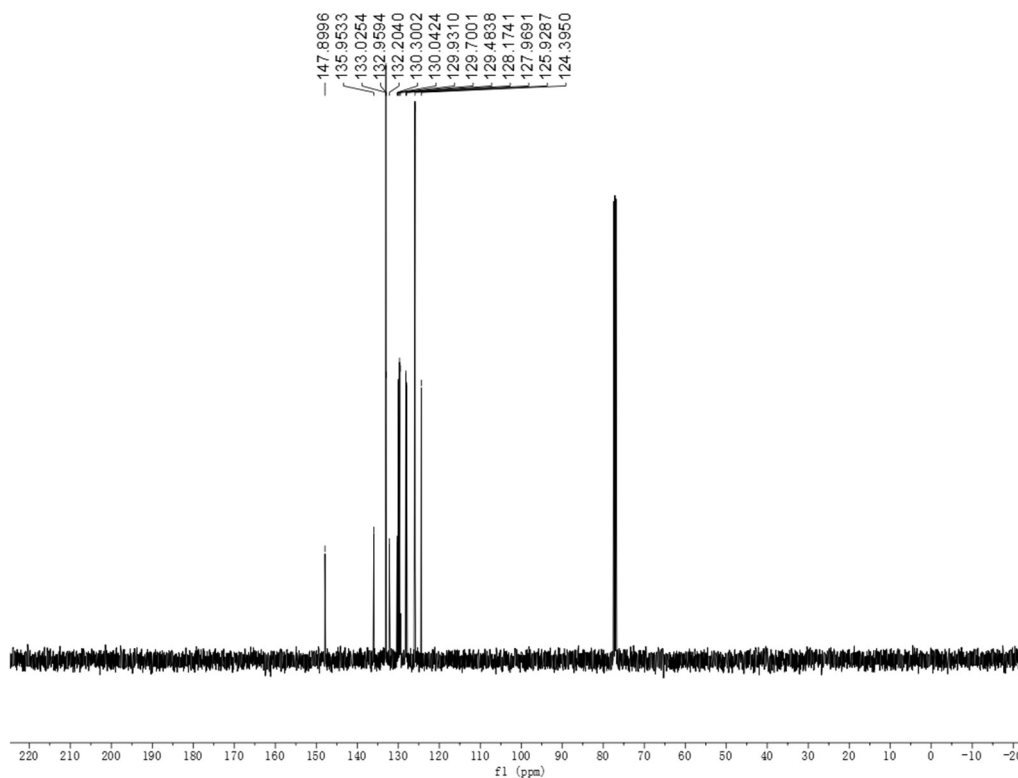

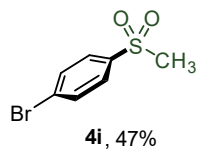

$^1\text{H}$  NMR (400 MHz,  $\text{CDCl}_3$ )

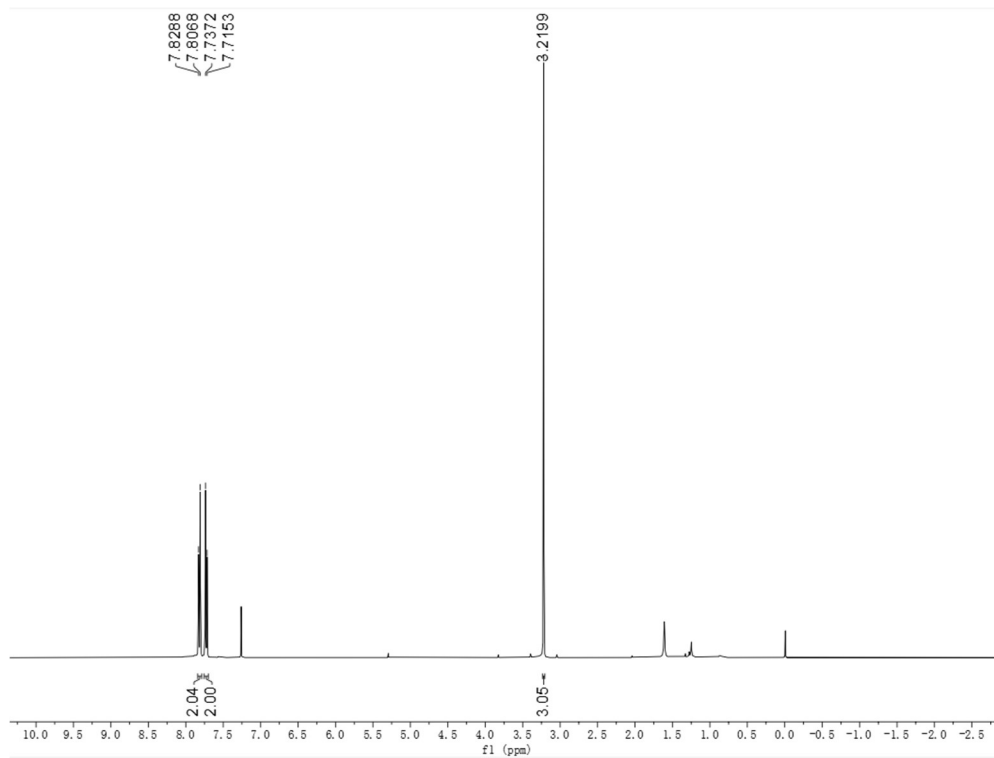

$^{13}\text{C}$  NMR (125 MHz,  $\text{CDCl}_3$ )

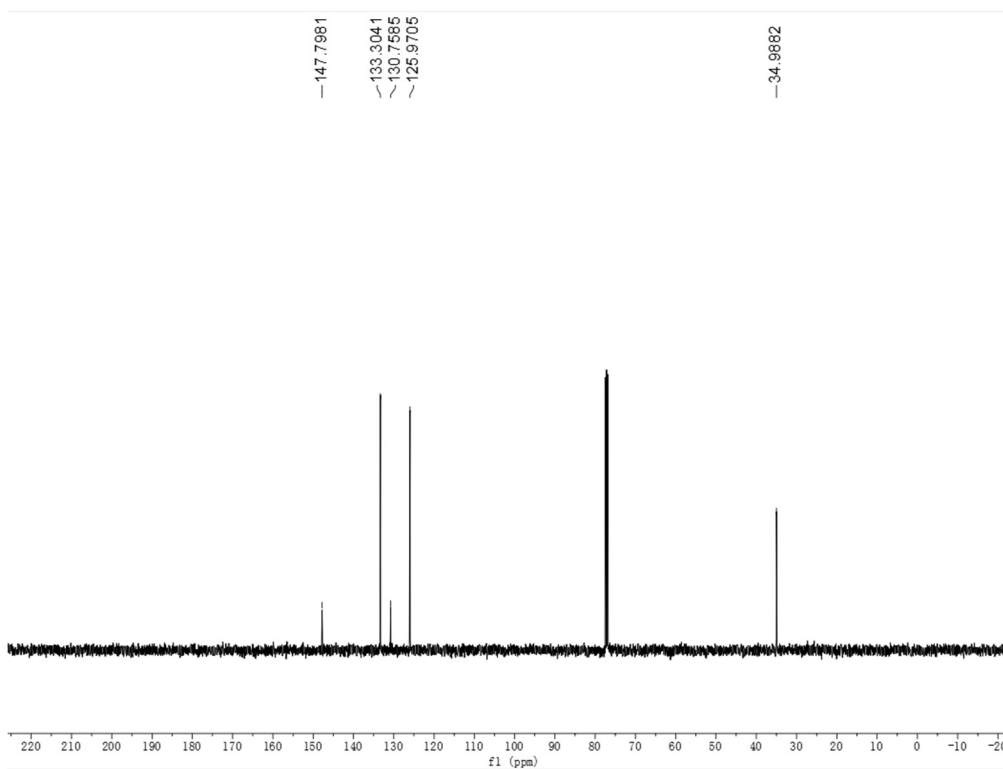

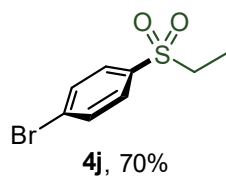

<sup>1</sup>H NMR (500 MHz, CDCl<sub>3</sub>)

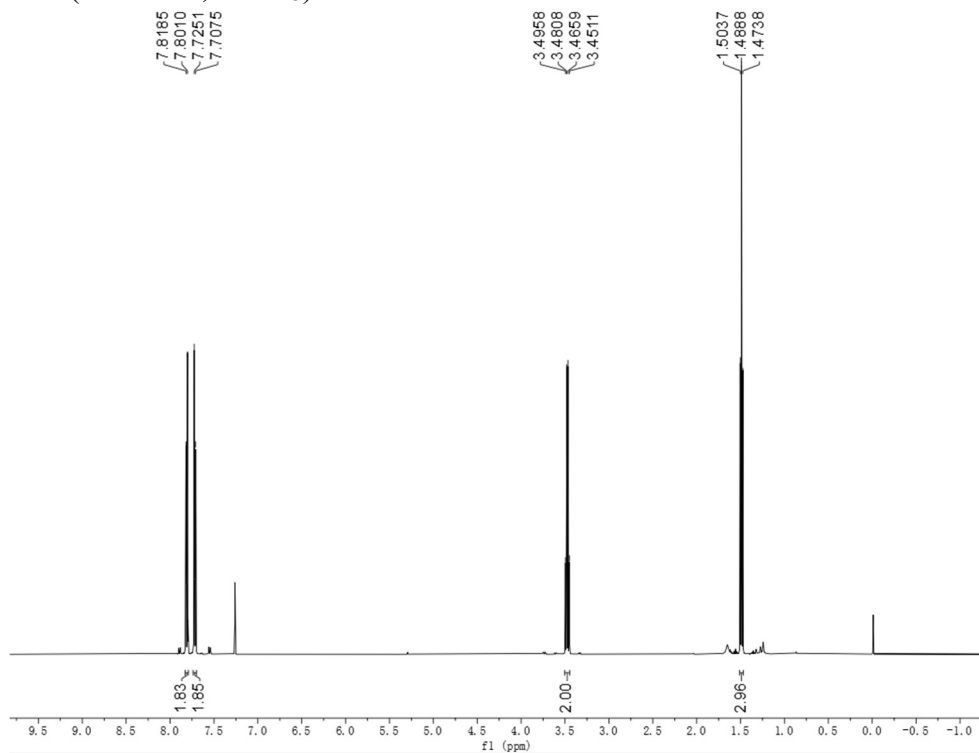

<sup>13</sup>C NMR (125 MHz, CDCl<sub>3</sub>)

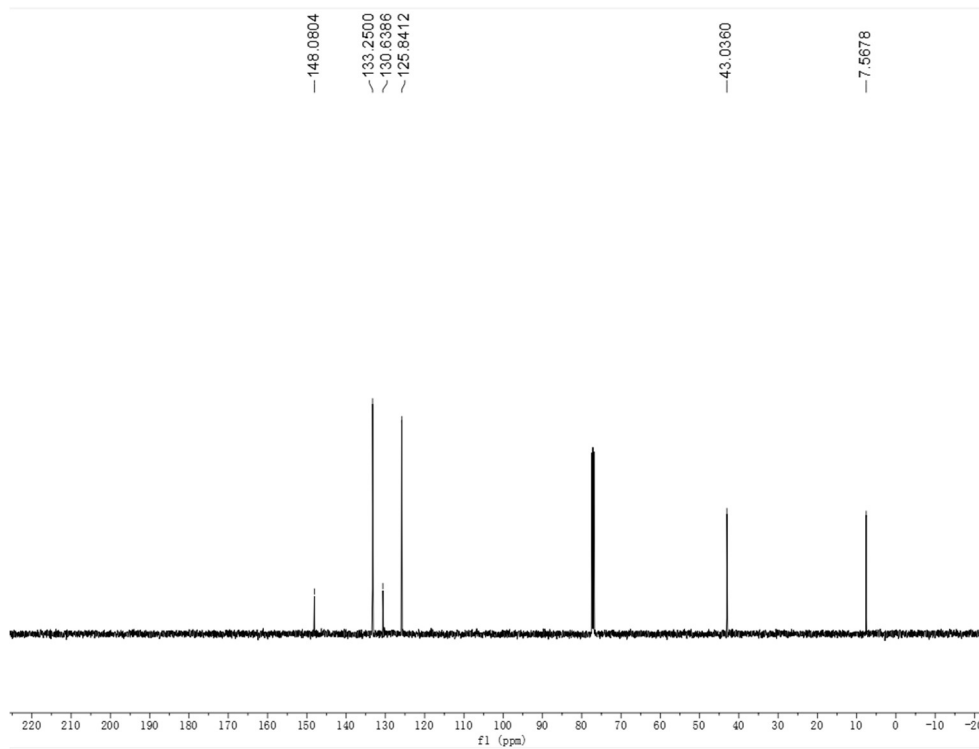

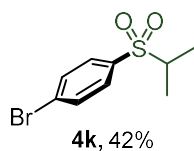

$^1\text{H}$  NMR (500 MHz,  $\text{CDCl}_3$ )

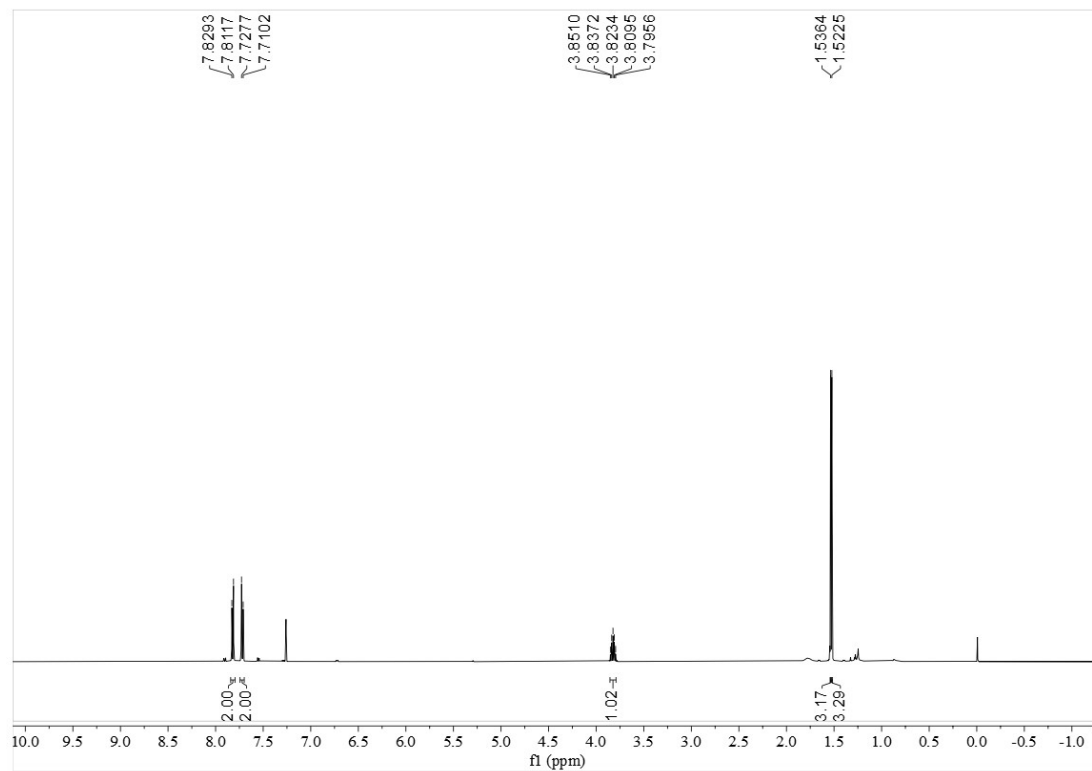

$^{13}\text{C}$  NMR (125 MHz,  $\text{CDCl}_3$ )

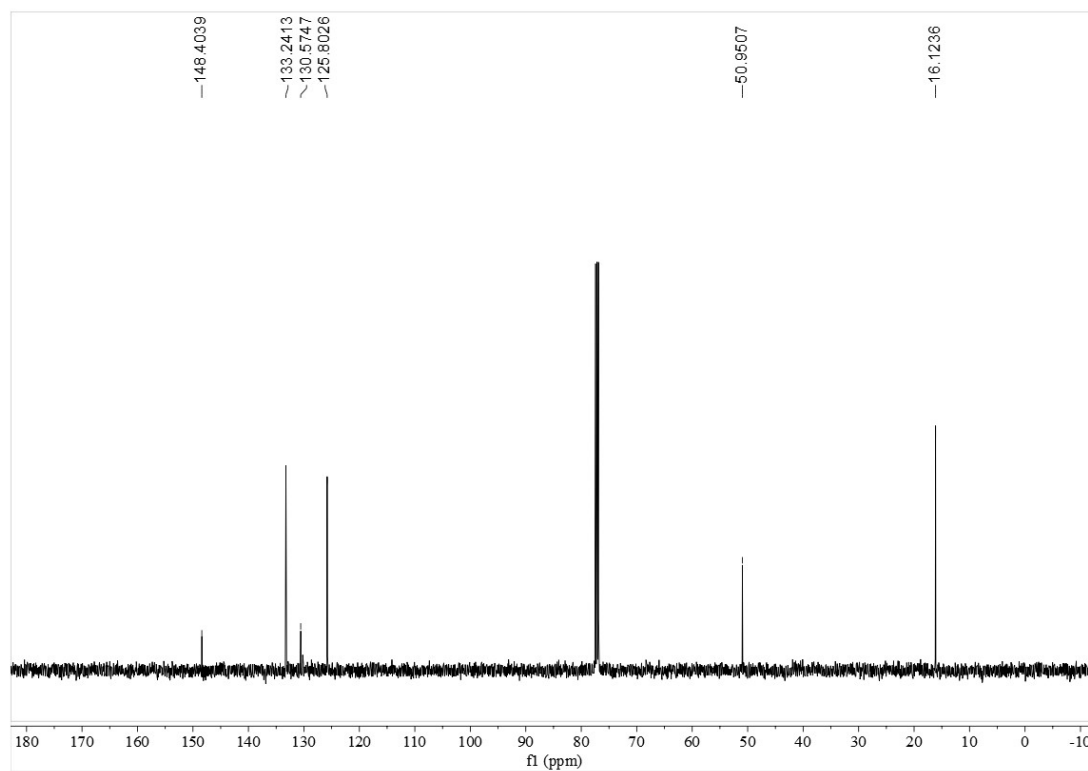

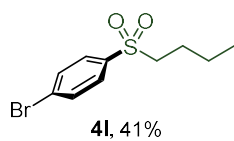

$^1\text{H}$  NMR (400 MHz,  $\text{CDCl}_3$ )

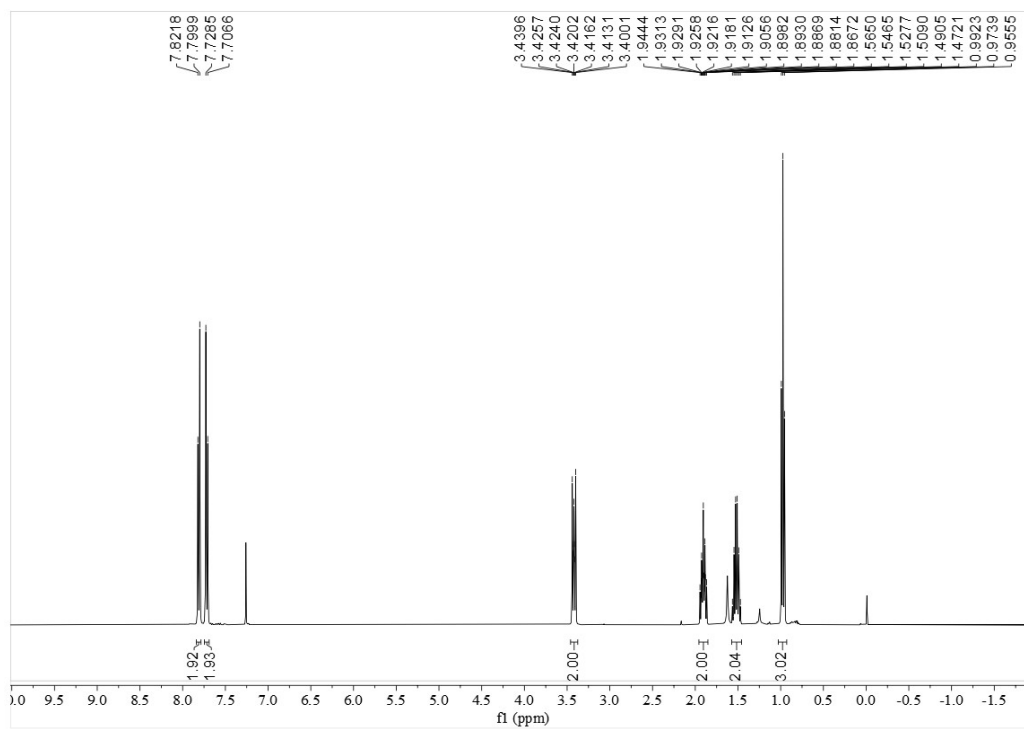

$^{13}\text{C}$  NMR (125 MHz,  $\text{CDCl}_3$ )

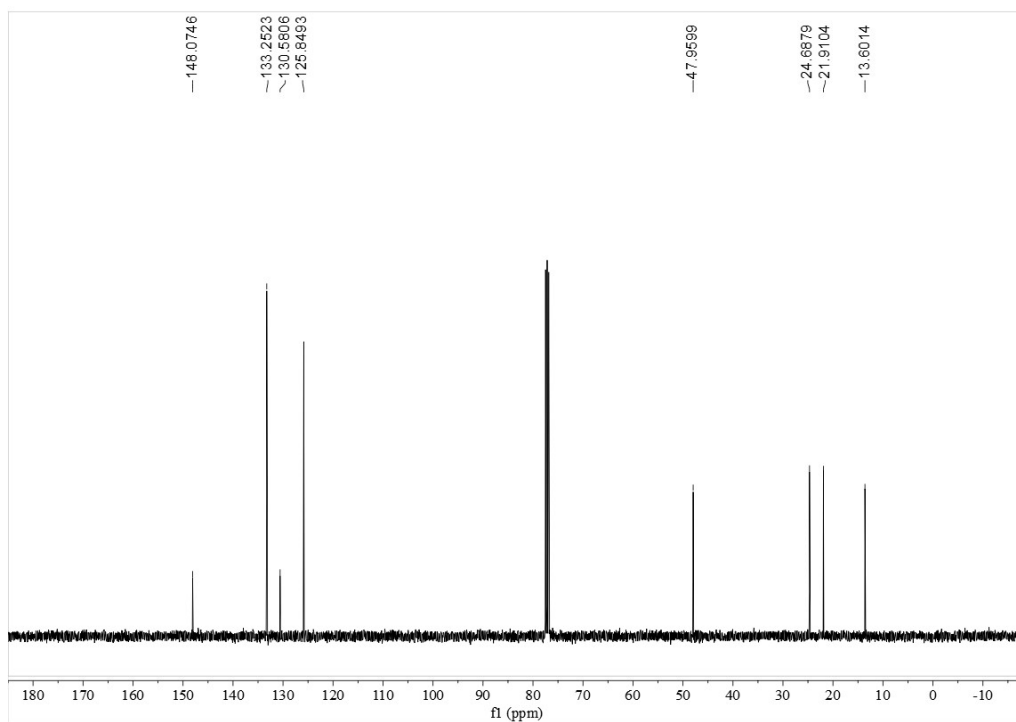

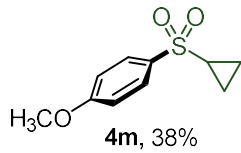

$^1\text{H}$  NMR (500 MHz, DMSO- $d_6$ )

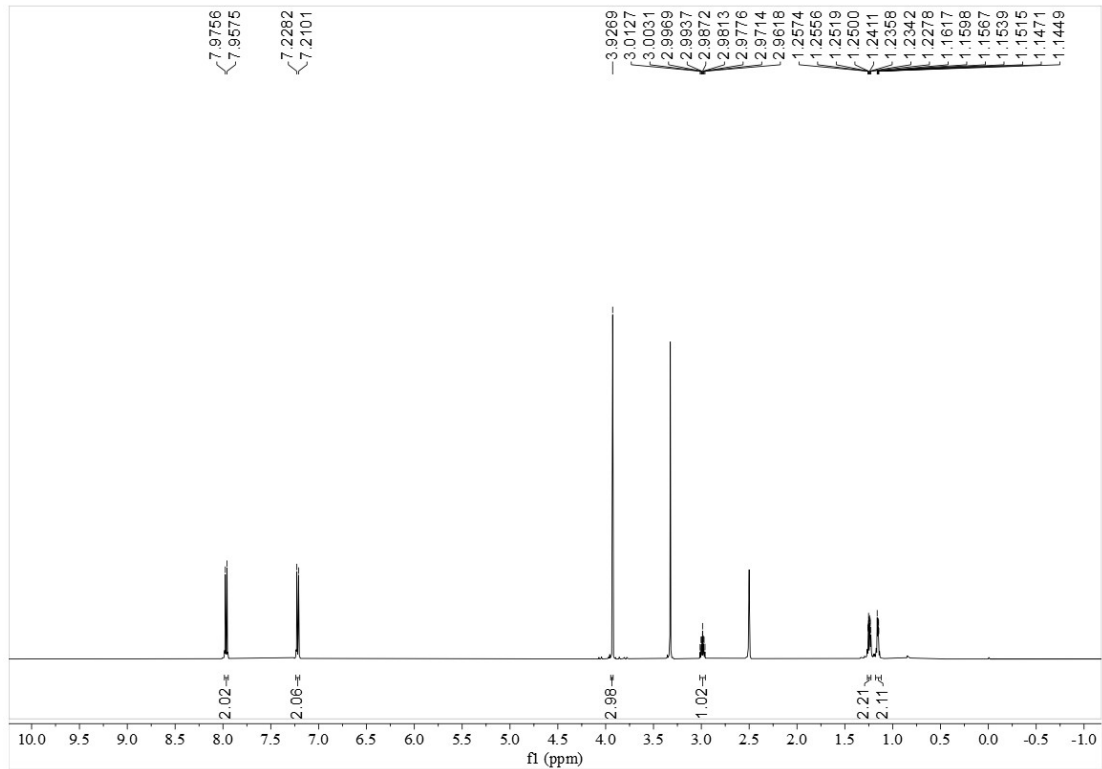

$^{13}\text{C}$  NMR (125 MHz, DMSO- $d_6$ )

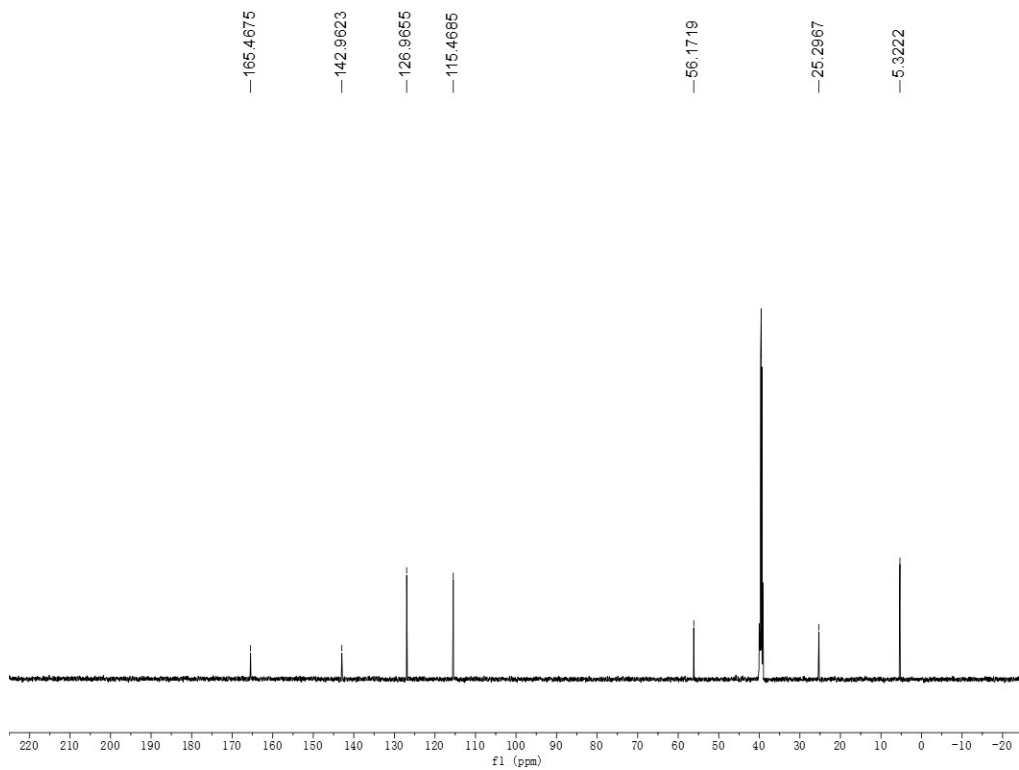

## 10. References

1. N. Zhang, Z.-J. Quan, Z. Zhang, Y.-X. Da and X.-C. Wang, *Chem. Commun.*, 2016, **52**, 14234-14237.
2. (a) L. K. Liu, Y. Chi and K.-Y. Jen, *J. Org. Chem.*, 1980, **45**, 406-410; (b) X. Zhou, J. Luo, J. Liu, S. Peng and G.-J. Deng, *Org. Lett.*, 2011, **13**, 1432-1435.
